# Supplementary material for: The synthesis and biological evaluation of a kabiramide C fragment modified with a WH2 consensus actin-binding motif as a potential disruptor of the actin cytoskeleton
Source: Royal Society of Chemistry journal article supplement (doi:10.1039/c5cc06081h), 2015-11-06
Supplement: c5cc06081h1.pdf [file c5cc06081h1.pdf]

## SUPPORTING INFORMATION

Daniel J. Tetlow, Steve J. Winder and Christophe Aïssa  
aïssa@liverpool.ac.uk  
s.winder@sheffield.ac.uk

**General.** Otherwise noted, all reactions were carried out in flame-dried glassware under dry nitrogen atmosphere. The solvents were purified with the solvent purification system Pure Solv MD-6 (THF, Et<sub>2</sub>O, CH<sub>2</sub>Cl<sub>2</sub>, benzene, toluene, hexane). Dry acetone was purchased from VWR. Flash chromatography: Merck silica gel 60 (230-400 mesh). NMR: Spectra were recorded on a Bruker DRX 500 and a Bruker DPX 400 spectrometers in CDCl<sub>3</sub>; chemical shifts ( $\delta$ ) are given in ppm. The solvent signals were used as references and the chemical shifts converted to the TMS scale (CDCl<sub>3</sub>:  $\delta_C = 77.0$  ppm; residual CHCl<sub>3</sub> in CDCl<sub>3</sub>:  $\delta_H = 7.26$  ppm); apparent splitting patterns are designated using the following abbreviations: s (singlet), d (doublet), t (triplet), q (quartet), quint. (quintuplet), m (multiplet), br (broad), and the appropriate combinations. IR: PerkinElmer Spectrum 100 FT-IR spectrometer, wavenumbers ( $\tilde{\nu}$ ) in cm<sup>-1</sup>. HRMS determined at the University of Liverpool on micromass LCT mass spectrometer (ES+) and Trio-1000 or Agilent QTOF 7200 mass spectrometers (CI). Melting points: Griffin melting point apparatus (not corrected). Elemental analyses: University of Liverpool. Optical rotations were measured on a PerkinElmer Model 343 plus polarimeter with a sodium lamp (D line, 589 nm) at ambient temperature (indicated in °C as superscript) using a 1 mL quartz cell of 100 mm length; solution concentration (c) are given in g/100 mL. All commercially available compounds were used as received.

|                                                                                                                           |     |
|---------------------------------------------------------------------------------------------------------------------------|-----|
| Preparation of compound <b>3a–3c</b>                                                                                      | S2  |
| Preparation of common intermediate <b>4</b>                                                                               | S8  |
| Preparation of compounds <b>5a–5c</b> , <b>6a–6c</b> and <b>7a–7c</b>                                                     | S11 |
| Preparation of compounds <b>8</b> and <b>9</b>                                                                            | S15 |
| Preparation of compounds <b>10</b> and <b>11</b>                                                                          | S19 |
| Bioassays conducted on <b>7a–7c</b> , <b>10</b> and <b>11</b>                                                             | S21 |
| NMR spectra of compounds <b>3a–c</b> , <b>SI-19–21</b> , <b>4</b> , <b>5a–c</b> , <b>6a–c</b> , <b>7a–c</b> , <b>8–11</b> | S24 |

### Preparation of compounds 3a–3c

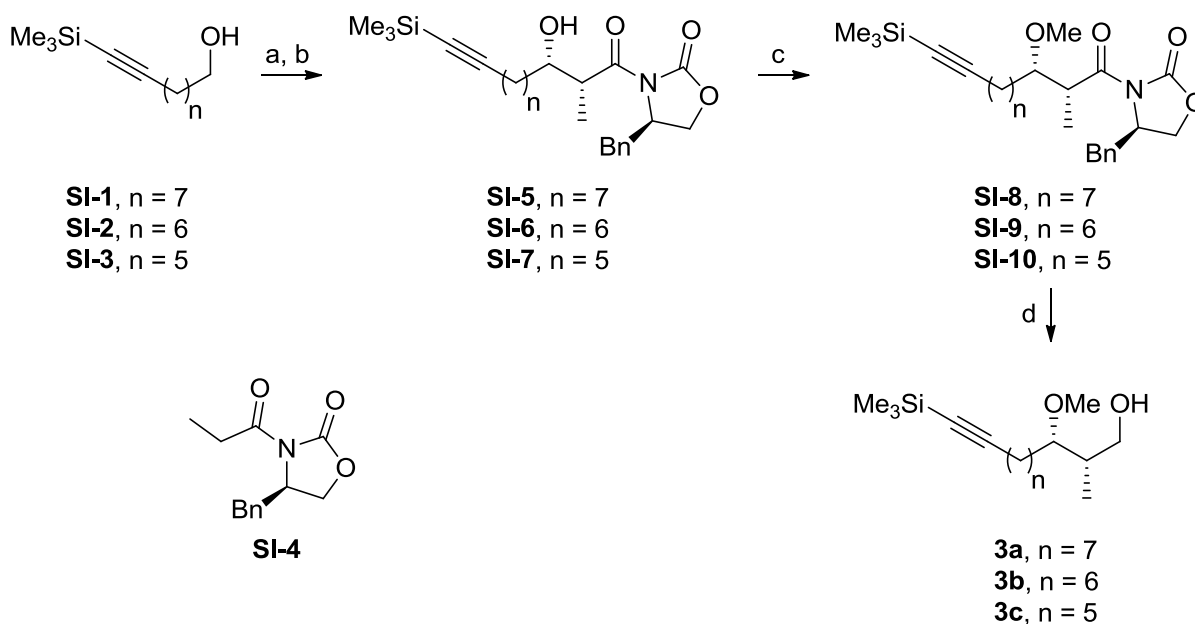

(a)  $(\text{COCl})_2$ , DMSO,  $\text{Et}_3\text{N}$ ,  $\text{CH}_2\text{Cl}_2$ , (b) i) **SI-4**,  $\text{Et}_3\text{N}$ ,  $\text{Bu}_2\text{BOTf}$ ,  $\text{CH}_2\text{Cl}_2$ ; ii) **SI-1–SI-3**; iii) pH 7-buffer,  $\text{H}_2\text{O}_2$ , MeOH. (c)  $\text{Me}_3\text{O}\cdot\text{BF}_4$ , proton sponge,  $\text{CH}_2\text{Cl}_2$ . (d)  $\text{LiAlH}_4$ ,  $\text{Et}_2\text{O}$ .

**Compound SI-1.** This compound was prepared according to a literature procedure.<sup>1</sup> To ethylenediamine (50 mL) at 0 °C under  $\text{N}_2$  was added NaH (2.07 g, 51.9 mmol, 60% in oil) portionwise. The reaction mixture was stirred at 0 °C for 15 minutes then at room temperature for 1 hour. The purple/brown reaction mixture was heated at 60 °C for 1 hour, cooled to 40 °C and 3-decyn-1-ol (2 g, 13.0 mmol) was added. The reaction was stirred at 40 °C for 1.5 hours then at 65 °C for 2 hours. The reaction mixture was cooled to 0 °C and quenched by addition of  $\text{H}_2\text{O}$  (50 mL) and 1M HCl (50 mL). The reaction was extracted with  $\text{Et}_2\text{O}$  (50 mL) and EtOAc (50 mL), the combined organics were washed with brine, dried ( $\text{Na}_2\text{SO}_4$ ) and the solvent removed under reduced pressure. Purification by flash chromatography ( $\text{SiO}_2$ , petroleum ether/ $\text{Et}_2\text{O}$ , 4:1 to 2:1) afforded 9-decyn-1-ol as a pale yellow oil (1.42 g, 71%). Some of this material (1.3 g, 8.44 mmol) was diluted in THF (42 mL) under  $\text{N}_2$  at 0 °C and  $\text{MeMgBr}$  (7.8 mL, 23.6 mmol, 3M in  $\text{Et}_2\text{O}$ ) was added dropwise. The reaction was warmed to ambient temperature and stirred for 16 hours. TMSCl (3.0 mL, 23.6 mmol) was added and the reaction stirred for 8 hours. 1M HCl (50 mL) was added carefully and the reaction stirred for 15 minutes. The mixture was extracted with  $\text{Et}_2\text{O}$  (2 x 100 mL), the combined organics dried ( $\text{Na}_2\text{SO}_4$ ) and the solvent removed under reduced pressure. Purification by flash column chromatography ( $\text{SiO}_2$ , petroleum ether: $\text{Et}_2\text{O}$ , 4:1) yielded **SI-1** as a pale yellow oil (960 mg, 50%).  $^1\text{H-NMR}$  ( $\text{CDCl}_3$ , 500 MHz)  $\delta$  3.63 (t,  $J = 6.6$  Hz, 2H), 2.18 (td,  $J = 7.2$  and 2.7 Hz, 2H), 1.94 (t,  $J = 2.7$  Hz, 1H), 1.59-1.49 (m, 4H) and 1.43-1.29 (m, 8H), 0.17 (s, 9H), in agreement with previously published data.<sup>2</sup>

<sup>1</sup> C. Melander. *Org. Biomol. Chem.*, 2011, **9**, 3041

<sup>2</sup> J. Robertson and J. N. Burrows, *Synthesis*, 1998, 63.

**Compound SI-2.** 8-nonyl-1-ol was prepared analogously from 3-nonyl-1-ol and **SI-2** (pale yellow oil, 55% over 2 steps) was then obtained following the same procedure as the one used for the preparation of **SI-1**. <sup>1</sup>H-NMR (CDCl<sub>3</sub>, 500 MHz) δ 3.66-3.60 (m, 2H), 2.21 (t, *J* = 7.1 Hz, 2H), 1.59-1.48 (m, 4H), 1.42-1.30 (m, 6H) and 0.13 (s, 9H), in agreement with previously published data.<sup>3</sup>

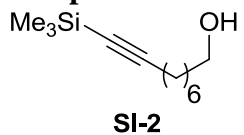

**Compound SI-3.** 7-octyn-1-ol (964 mg, 71%) was prepared analogously from 3-octyn-1-ol and **SI-3** (pale yellow oil, 85%) was then obtained following the same procedure as the one used for the preparation of **SI-1**. <sup>1</sup>H-NMR (CDCl<sub>3</sub>, 500 MHz) δ 3.67 (q, *J* = 6.8 Hz, 2H), 2.25 (t, *J* = 7.1 Hz, 2H), 1.63-1.52 (m, 4H), 1.47-1.37 (m, 4H), 1.27-1.23 (m, 1H), 0.17 (s, 9H) in agreement with previously published data.<sup>4</sup>

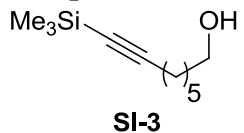

**Compound SI-5.** This compound was prepared from **SI-1** (344 mg, 1.29 mmol) using the same procedure as described for the preparation of **SI-7**. Colourless oil (442 mg, 75% over 2 steps). <sup>1</sup>H-NMR (500 MHz, CDCl<sub>3</sub>) δ = 7.38-7.34 (m, 2H), 7.33-7.30 (m, 1H), 7.24-7.21 (m, 2H), 4.73 (ddt, *J* = 9.4, 7.8 and 2.9 Hz, 1H), 4.25 (dd, *J* = 9.1 and 7.7 Hz, 1H), 4.21 (dd, *J* = 9.1 and 2.9 Hz, 1H), 3.99-3.95 (m, 1H), 3.77 (dq, *J* = 7.1 and 2.5 Hz, 1H), 3.27 (dd, *J* = 13.4 and 3.1 Hz, 1H), 2.89 (d, *J* = 2.3 Hz, 1H(OH)), 2.81 (dd, *J* = 13.3 and 9.5 Hz, 1H), 2.23 (t, *J* = 2.3 Hz, 2H), 1.60-1.47 (m, 4H), 1.46-1.30 (m, 8H), 1.28 (d, *J* = 7.3 Hz, 3H), 0.17 (s, 9H); <sup>13</sup>C-NMR (125 MHz, CDCl<sub>3</sub>) δ = 177.6, 153.0, 134.9, 129.4 (2C), 129.0 (2C), 127.4, 107.7, 84.2, 71.4, 66.2, 55.1, 42.1, 37.8, 33.8, 29.4, 29.0, 28.7, 28.6, 25.9, 19.8, 10.3, 0.2 (3C); IR (neat):  $\tilde{\nu}$  = 3517 (br), 3029, 2931, 2856, 2172, 1778, 1696, 1604, 1497, 1481, 1455, 1383, 1350, 1289, 1247, 1208, 1109, 1075, 1048, 1014, 970, 920, 760, 701 cm<sup>-1</sup>; HRMS (ES<sup>+</sup>) calcd for C<sub>26</sub>H<sub>39</sub>NO<sub>4</sub>SiNa 480.2546, found 480.2545; [ $\alpha$ ]<sub>D</sub><sup>20</sup> = -27.1 (*c* = 0.9, CHCl<sub>3</sub>).

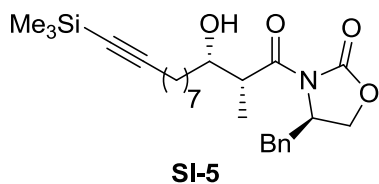

**Compound SI-6.** This compound was prepared from **SI-2** (495 mg, 2.33 mmol) using the same procedure as described for the preparation of **SI-7**. Colourless oil (438 mg, 49% over two steps). <sup>1</sup>H-NMR (500 MHz, CDCl<sub>3</sub>) δ = 7.36-7.32 (m, 2H), 7.30-7.27 (m, 1H), 7.22-7.19 (m, 2H), 4.74-4.68 (m, 1H), 4.23 (dd, *J* = 9.0 and 7.7 Hz, 1H), 4.19 (dd, *J* = 9.0 and 2.9 Hz, 1H), 3.97-3.92 (m, 1H), 3.76 (qd, *J* = 7.0 and 2.5 Hz, 1H), 3.25 (dd, *J* = 13.4 and 3.2 Hz, 1H), 2.88 (br s, 1H(OH)), 2.79 (dd, *J* = 13.4 and 9.4 Hz, 1H), 2.21 (t, *J* = 7.0 Hz, 2H), 1.59-1.47 (m, 4H), 1.44-1.29 (m, 6H), 1.25 (d, *J* = 7.0 Hz, 3H), 0.15 (s, 9H); <sup>13</sup>C-NMR (125 MHz, CDCl<sub>3</sub>) δ = 177.5, 153.0, 135.0, 129.4 (2C), 128.9 (2C), 127.4, 107.6, 84.2, 71.4, 66.1, 55.0, 42.1, 37.8, 33.7, 29.0, 28.7, 28.5, 25.8, 19.8, 10.3, 0.1 (3C); IR (neat):  $\tilde{\nu}$  = 3528 (br), 2932, 2857, 2172, 1779, 1695, 1497, 1455, 1384, 1350, 1289, 1247, 1209, 1107, 1048, 1013, 970, 842, 760, 701 cm<sup>-1</sup>; HRMS (ES<sup>+</sup>) calcd for C<sub>25</sub>H<sub>37</sub>NO<sub>4</sub>SiNa 466.2390, found 466.2387; [ $\alpha$ ]<sub>D</sub><sup>20</sup> = -25.9 (*c* = 1.25, CHCl<sub>3</sub>).

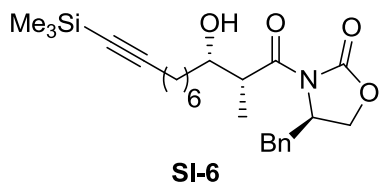

**Compound SI-7.** Under N<sub>2</sub> atmosphere, DMSO (0.96 mL, 13.47 mmol) was added via syringe to oxalylchloride (0.700 mL, 8.09 mmol) in CH<sub>2</sub>Cl<sub>2</sub> (50 mL) at -78 °C. The reaction was stirred for 10 minutes and **SI-3** (1.06 g, 5.39 mmol) in CH<sub>2</sub>Cl<sub>2</sub> (3 mL) was added dropwise. The reaction was stirred for 1 hour, Et<sub>3</sub>N (3.74 mL, 26.9 mmol) was added and the reaction warmed to room temperature. Saturated aqueous NH<sub>4</sub>Cl (30 mL) was added and the reaction mixture was extracted with CH<sub>2</sub>Cl<sub>2</sub> (3 × 50 mL). The combined organic layers were dried (Na<sub>2</sub>SO<sub>4</sub>) and the solvent removed under reduced pressure. The crude aldehyde was used without further purification in the next step. Under N<sub>2</sub> atmosphere, Bu<sub>2</sub>OTf (4.35 mL, 4.35

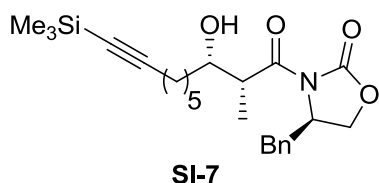

<sup>3</sup> M. G. Organ and H. Ghasemi, *J. Org. Chem.*, 2004, **69**, 695.

<sup>4</sup> M.-J. Wu, C.-L. Lee, Y.-C. Wu and C.-P. Chen, *Eur. J. Org. Chem.* **2008**, 854

mmol, 1M in CH<sub>2</sub>Cl<sub>2</sub>) was added dropwise to **SI-4** (930 mg, 3.99 mmol) in CH<sub>2</sub>Cl<sub>2</sub> (36 mL) at 0 °C. The reaction was stirred for 10 minutes and Et<sub>3</sub>N (0.655 mL, 4.71 mmol) was added. The mixture was cooled to -78 °C and a solution of the aldehyde previously obtained (0.711, 3.63 mmol) in CH<sub>2</sub>Cl<sub>2</sub> (2 mL) was added and the mixture was then stirred at -78 °C for 90 minutes. The reaction mixture was warmed to 0 °C and stirred for 90 minutes. A pH7 buffer (10 mL) in MeOH (30 mL) and H<sub>2</sub>O<sub>2</sub> (2 mL) in MeOH (10 mL) were added and the reaction mixture stirred at 0 °C for 1 hour. The volatiles were removed under reduced pressure and the reaction extracted with Et<sub>2</sub>O (3 × 50 mL). The combined organics were washed with saturated aqueous NaHCO<sub>3</sub> (50 mL) and brine (50 mL), dried (Na<sub>2</sub>SO<sub>4</sub>) and the solvent removed under reduced pressure. Purification by flash column chromatography on silica gel (petroleum ether/Et<sub>2</sub>O, 9:1 to 4:1 to 1:1) gave **SI-7** as a colourless oil (790 mg, 51%). <sup>1</sup>H-NMR (CDCl<sub>3</sub>, 500 MHz) δ 7.36-7.31 (m, 2H), 7.30-7.26 (m, 1H), 7.22-7.18 (m, 2H), 4.72-4.68 (m, 1H), 4.22 (dd, *J* = 9.1 and 7.7 Hz, 1H), 4.19 (dd, *J* = 9.1 and 3.0 Hz, 1H), 3.97-3.92 (m, 1H), 3.75 (qd, *J* = 7.1 and 2.6 Hz, 1H), 3.24 (dd, *J* = 13.4 and 3.3 Hz, 1H), 2.86 (br s, 1H(OH)), 2.79 (dd, *J* = 13.4 and 9.5 Hz, 1H), 2.21 (t, *J* = 7.1 Hz, 2H), 1.59-1.30 (m, 8H), 1.25 (d, *J* = 7.1 Hz, 3H) and 0.14 (s, 9H); <sup>13</sup>C-NMR (CDCl<sub>3</sub>, 125 MHz) δ 177.6, 153.0, 135.0, 129.4 (2C), 129.0 (2C), 127.4, 107.5, 84.4, 71.4, 66.2, 55.1, 42.1, 37.8, 33.7, 28.7, 28.5, 25.6, 19.8, 10.4, 0.2 (3C); IR (neat):  $\tilde{\nu}$  = 3517 (br), 3029, 2937, 2860, 2172, 1777, 1697, 1604, 1497, 1481, 1455, 1383, 1350, 1289, 1247, 1209, 1109, 1075, 1049, 1011, 977, 921, 840, 760, 700 cm<sup>-1</sup>; MS (ES<sup>+</sup>) *m/z* (rel. intensity) 452 (100 %, [M+Na]<sup>+</sup>); HRMS calcd for C<sub>24</sub>H<sub>35</sub>O<sub>4</sub>NSiNa 452.2233, found 452.2249; [ $\alpha$ ]<sub>D</sub><sup>20</sup> = -36.4 (*c* = 1, CHCl<sub>3</sub>).

**Compound SI-8.** This compound was prepared from **SI-5** (442 mg, 0.97 mmol) using the same

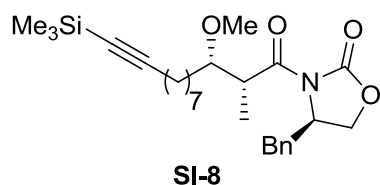

procedure as described for the preparation of **SI-10**. Colourless oil (295 mg, 65%). <sup>1</sup>H-NMR (500 MHz, CDCl<sub>3</sub>) δ = 7.37-7.33 (m, 2H), 7.31-7.28 (m, 1H), 7.25-7.22 (m, 2H), 4.67 (ddt, *J* = 9.9, 6.9 and 2.8 Hz, 1H), 4.21 (dd, *J* = 9.2 and 7.5 Hz, 1H), 4.18 (dd, *J* = 9.2 and 2.9 Hz, 1H), 4.10-4.02 (m, 1H), 3.43-3.39 (m, 1H), 3.38 (s, 3H), 3.32 (dd, *J* = 13.4 and 3.0 Hz, 1H), 2.78 (dd, *J* = 13.4 and 10.1 Hz, 1H), 2.22 (t, *J* = 7.2 Hz, 2H), 1.55-1.35 (m, 5H), 1.35-1.28 (m, 7H), 1.25 (d, *J* = 6.7 Hz, 3H), 0.16 (s, 9H); <sup>13</sup>C-NMR (125 MHz, CDCl<sub>3</sub>) δ = 175.4, 153.1, 135.3, 129.4 (2C), 128.9 (2C), 127.3, 107.7, 84.2, 82.7, 66.0, 58.4, 55.8, 41.0, 37.8, 31.9, 29.6, 29.0, 28.7, 28.6, 25.8, 19.8, 12.6, 0.2 (3C); IR (neat):  $\tilde{\nu}$  = 2931, 2856, 2172, 1779, 1696, 1497, 1481, 1379, 1349, 1289, 1247, 1208, 1194, 1107, 1050, 1013, 966, 921, 839, 759, 700 cm<sup>-1</sup>; MS (ES<sup>+</sup>) *m/z* (rel. intensity) 494 (100 %, [M+Na]<sup>+</sup>); HRMS (ES<sup>+</sup>) calcd for C<sub>27</sub>H<sub>41</sub>O<sub>4</sub>NSiNa 494.2703, found 494.2702; [ $\alpha$ ]<sub>D</sub><sup>20</sup> = -55.6 (*c* = 1.3, CHCl<sub>3</sub>).

**Compound SI-9.** This compound was prepared from **SI-6** (295 mg, 0.66 mmol) using the same

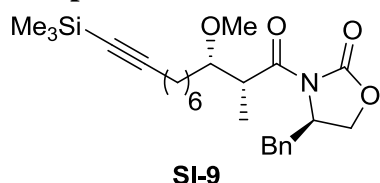

procedure as described for the preparation of **SI-10**. Colourless oil (195 mg, 65 %). <sup>1</sup>H-NMR (500 MHz, CDCl<sub>3</sub>) δ = 7.35-7.31 (m, 2H), 7.30-7.27 (m, 1H), 7.23-7.21 (m, 2H), 4.65 (ddt, *J* = 9.9, 7.0 and 2.9 Hz, 1H), 4.21-4.15 (m, 2H), 4.10-4.02 (m, 1H), 3.42-3.38 (m, 1H), 3.37 (s, 3H), 3.31 (dd, *J* = 13.0 and 3.1 Hz, 1H), 2.77 (dd, *J* = 13.0 and 9.8 Hz, 1H), 2.21 (t, *J* = 7.0 Hz, 2H), 1.55-1.28 (m, 10H), 1.24 (d, *J* = 7.0 Hz, 3H), 0.14 (s, 9H); <sup>13</sup>C-NMR (125 MHz, CDCl<sub>3</sub>) δ = 175.4, 153.1, 135.3, 129.4 (2C), 128.9 (2C), 127.3, 107.6, 84.3, 82.6, 65.9, 58.4, 55.7, 41.0, 37.8, 31.9, 29.2, 28.7, 28.5, 25.7, 19.8, 12.6, 0.1 (3C); IR (neat):  $\tilde{\nu}$  = 2933, 2858, 2172, 1779, 1696, 1604, 1497, 1481, 1455, 1379, 1349, 1288, 1247, 1208, 1194, 1106, 1050, 1014, 966, 924, 841, 760, 701 cm<sup>-1</sup>; MS (ES<sup>+</sup>) *m/z* (rel. intensity) 480 (100 %, [M+Na]<sup>+</sup>); HRMS calcd for C<sub>26</sub>H<sub>39</sub>NO<sub>4</sub>SiNa 480.2546, found 480.2557; [ $\alpha$ ]<sub>D</sub><sup>20</sup> = -49.5 (*c* = 0.85, CHCl<sub>3</sub>).

**Compound SI-10.** Under N<sub>2</sub> atmosphere, proton sponge (850 mg, 6.96 mmol) and Me<sub>3</sub>O•BF<sub>4</sub> (1.02 g, 6.96 mmol) were added to **SI-7** (750 mg, 1.74 mmol) in CH<sub>2</sub>Cl<sub>2</sub> (17.4 mL, 0.1M) in a flask covered with aluminium foil. The reaction was stirred in the dark at room temperature for 40 hours. The reaction mixture was diluted with CH<sub>2</sub>Cl<sub>2</sub> (30 mL), washed with saturated aqueous NH<sub>4</sub>Cl (20 mL) and brine (20 mL), dried (Na<sub>2</sub>SO<sub>4</sub>) and the solvent removed under reduced pressure. Purification by flash column chromatography on silica gel (petroleum ether/Et<sub>2</sub>O, 20:1) afforded **SI-10** as a pale yellow oil (632 mg, 82%). <sup>1</sup>H-NMR (500 MHz, CDCl<sub>3</sub>) δ = 7.35-7.30 (m, 2H), 7.28-7.25 (m, 1H), 7.22-7.19 (m, 2H), 4.65 (ddt, *J* = 9.9, 7.1 and 2.9 Hz, 1H), 4.21-4.15 (m, 2H), 4.10-4.02 (m, 1H), 3.41 (q, *J* = 5.9 Hz, 1H), 3.39 (s, 3H), 3.30 (dd, *J* = 13.4 and 3.2 Hz, 1H), 2.76 (dd, *J* = 13.4 and 9.8 Hz, 1H), 2.21 (t, *J* = 7.2 Hz, 2H), 1.55-1.28 (m, 8H), 1.24 (d, *J* = 7.0 Hz, 3H), 0.13 (s, 9H); <sup>13</sup>C-NMR (125 MHz, CDCl<sub>3</sub>) δ = 175.4, 153.1, 135.3, 129.4 (2C), 128.9 (2C), 127.3, 107.5, 84.3, 82.7, 66.0, 58.4, 55.7, 41.0, 37.8, 31.8, 28.8, 28.6, 25.3, 19.8, 12.7, 0.2 (3C); IR (neat):  $\tilde{\nu}$  = 3029, 2936, 2860, 2172, 1778, 1696, 1604, 1497, 1454, 1378, 1349, 1289, 1247, 1209, 1194, 1106, 1049, 1012, 967, 920, 840, 760, 701 cm<sup>-1</sup>; MS (ES<sup>+</sup>) *m/z* (rel. intensity) 444 (100 %, [M+H]<sup>+</sup>); HRMS calcd for C<sub>25</sub>H<sub>37</sub>O<sub>4</sub>NSi 444.2565, found 444.2583.

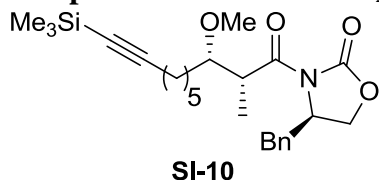

**Compound 3a.** This compound was prepared from **SI-8** (215 mg, 0.456 mmol) using the same procedure as described for the preparation of **3c**. Colourless oil (109 mg, 80%). <sup>1</sup>H-NMR (500 MHz, CDCl<sub>3</sub>) δ = 3.69 (ddd, *J* = 10.6, 7.5 and 3.4 Hz, 1H), 3.58 (dt, *J* = 10.6 and 4.8 Hz, 1H), 3.40 (s, 3H), 3.27-3.24 (m, 1H), 3.27-3.23 (m, 1H), 2.76-2.72 (m, 1H(OH)), 2.22 (t, *J* = 7.2 Hz, 2H), 2.10-2.00 (m, 1H), 1.60-1.49 (m, 3H), 1.46-1.24 (m, 9H), 0.87 (d, *J* = 7.3 Hz, 3H), 0.16 (s, 9H); <sup>13</sup>C-NMR (125 MHz, CDCl<sub>3</sub>) δ = 107.6, 85.0, 84.2, 66.4, 57.6, 36.3, 29.6 (2C), 29.0, 28.7, 28.6, 26.2, 19.8, 11.6, 0.1 (3C); IR (neat):  $\tilde{\nu}$  = 3407 (br), 2930, 2856, 2173, 1460, 1378, 1248, 1091, 1028, 841, 759, 698 cm<sup>-1</sup>; MS (ES<sup>+</sup>) *m/z* (rel. intensity) 321 (100 %, [M+Na]<sup>+</sup>); HRMS (ES<sup>+</sup>) calcd for C<sub>17</sub>H<sub>34</sub>O<sub>2</sub>SiNa 321.2226, found 321.2226; [ $\alpha$ ]<sub>D</sub><sup>20</sup> = +10.2 (*c* = 0.85, CHCl<sub>3</sub>).

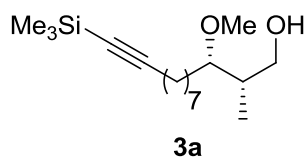

**Compound 3b.** This compound was prepared from **SI-9** (150 mg, 0.33 mmol) using the same procedure as described for the preparation of **3c**. Colourless oil (65 mg, 69%). <sup>1</sup>H-NMR (500 MHz, CDCl<sub>3</sub>) δ = 3.69 (dd, *J* = 10.5 and 7.6 Hz, 1H), 3.58 (dd, *J* = 10.8 and 4.7 Hz, 1H), 3.39 (s, 3H), 3.27-3.23 (m, 1H), 2.64 (brs, 1H (OH)), 2.22 (t, *J* = 7.2 Hz, 2H), 2.07-2.00 (m, 1H), 1.59-1.48 (m, 3H), 1.46-1.36 (m, 4H), 1.36-1.24 (m, 3H), 0.86 (d, *J* = 7.0 Hz, 3H), 0.15 (s, 9H); <sup>13</sup>C-NMR (125 MHz, CDCl<sub>3</sub>) δ = 107.4, 84.9, 84.4, 66.3, 57.7, 36.4, 29.5, 28.9, 28.5, 28.3, 25.7, 19.8, 11.6, 0.1 (3C); IR (neat):  $\tilde{\nu}$  = 3400 (br), 2933, 2858, 2174, 1461, 1379, 1248, 1194, 1157, 1091, 1029, 924, 839, 758, 694 cm<sup>-1</sup>; MS (ES<sup>+</sup>) *m/z* (rel. intensity) 307 (100 %, [M+Na]<sup>+</sup>); HRMS calcd for C<sub>16</sub>H<sub>32</sub>O<sub>2</sub>SiNa 307.2069, found 307.2076; [ $\alpha$ ]<sub>D</sub><sup>20</sup> = +8.0 (*c* = 0.15, CHCl<sub>3</sub>).

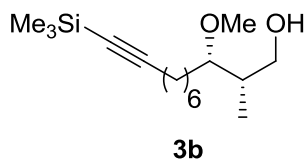

**Compound 3c.** Under N<sub>2</sub> atmosphere, **SI-10** (602 mg, 1.35 mmol) in Et<sub>2</sub>O (1 mL) was added dropwise via cannula to a suspension of LiAlH<sub>4</sub> (26 mg, 0.68 mmol) in Et<sub>2</sub>O (14 mL) at 0 °C. The reaction was stirred for 30 minutes at 0 °C and a second portion of LiAlH<sub>4</sub> (26 mg, 0.68 mmol) was added. The reaction was warmed slowly to room temperature and stirred for 2 hours. The reaction was diluted with Et<sub>2</sub>O (10 mL) and saturated aqueous Na<sub>2</sub>SO<sub>4</sub> was added dropwise (slowly) until a white precipitate had formed. The reaction mixture was filtered through Celite and the solvent removed under reduced pressure. Purification by flash column chromatography on silica gel (petroleum ether/Et<sub>2</sub>O, 10:1 to 2:1) afforded **3** as a pale yellow oil (235 mg, 64%). <sup>1</sup>H-NMR (500 MHz, CDCl<sub>3</sub>) δ = 3.69 (ddd, *J* = 10.8, 7.6 and 4.7 Hz, 1H), 3.58 (ddd, *J* = 10.7, 5.7 and 4.7 Hz, 1H), 3.40 (s, 3H), 3.28-3.23 (m, 1H), 2.65-2.61 (m, 1H(OH)), 2.23 (t, *J* = 7.1 Hz, 2H), 2.09-2.01 (m, 1H), 1.60-1.50 (m, 3H), 1.47-1.37 (m, 4H), 1.35-1.27 (m, 1H), 0.86 (d, *J* = 7.2 Hz, 3H), 0.15 (s, 9H); <sup>13</sup>C-NMR (125 MHz, CDCl<sub>3</sub>) δ = 107.4, 84.9,

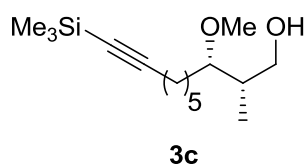

84.4, 66.3, 57.7, 36.4, 29.6, 28.9, 28.5, 25.7, 19.8, 11.6, 0.1 (3C); IR (neat):  $\tilde{\nu}$  = 3391 (br), 2934, 2173, 1459, 1379, 1248, 1193, 1161, 1091, 1032, 841, 759, 697  $\text{cm}^{-1}$ ; MS (ES<sup>+</sup>)  $m/z$  (rel. intensity) 293 (100 %, [M+Na]<sup>+</sup>); HRMS calcd for C<sub>15</sub>H<sub>30</sub>O<sub>2</sub>SiNa 293.1913, found 293.1913; [ $\alpha$ ]<sub>D</sub><sup>20</sup> = +8.2 ( $c$  = 1.1, CHCl<sub>3</sub>).

A Mosher ester analysis was performed with one derivative to ascertain the stereochemistry of the products.

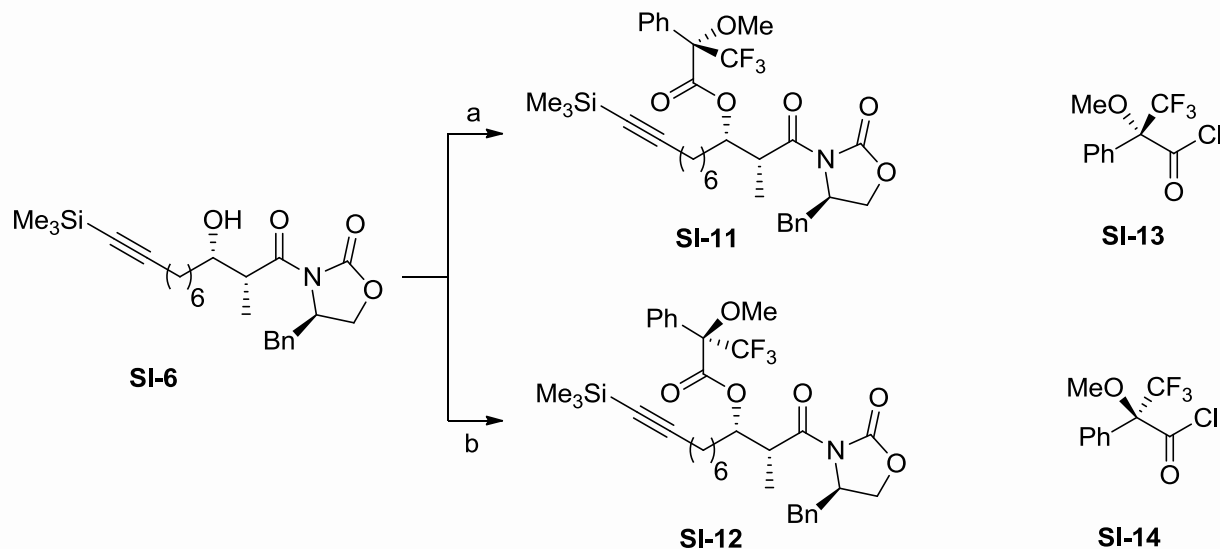

(<sup>a</sup>) **SI-13**, pyridine, CH<sub>2</sub>Cl<sub>2</sub>. (<sup>b</sup>) **SI-14**, pyridine, CH<sub>2</sub>Cl<sub>2</sub>.

**Compound SI-11.** A solution of **SI-6** (35 mg, 0.072 mmol), **SI-13** (24  $\mu\text{L}$ , 0.13 mmol) and pyridine (17  $\mu\text{L}$ , 0.22 mmol) in CH<sub>2</sub>Cl<sub>2</sub> (0.35 mL) was stirred for 12h at room temperature under N<sub>2</sub>. The mixture was quenched with water and extracted with Et<sub>2</sub>O (3  $\times$  5 mL). The combined organic layers were dried (Na<sub>2</sub>SO<sub>4</sub>) and the solvent removed under reduced pressure. Purification by flash column chromatography on silica gel (petroleum ether/Et<sub>2</sub>O, 20:1 to 10:1) afforded **SI-11** as a colourless oil (21 mg, 44%).<sup>5</sup>

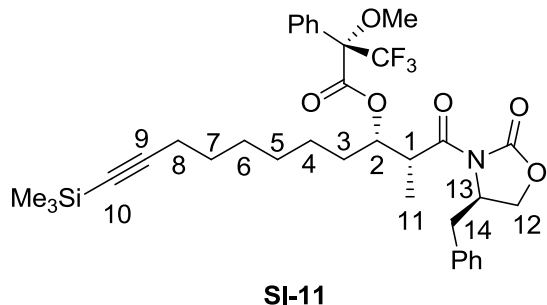

<sup>1</sup>H-NMR (500 MHz, CDCl<sub>3</sub>)  $\delta$  7.59-7.54 (m, 2H, ArH), 7.42-7.39 (m, 3H, ArH), 7.36-7.32 (m, 2H, ArH), 7.30-7.27 (m, 1H, ArH), 7.21-7.19 (m, 2H, ArH), 5.43 (ddd,  $J$  = 9.0, 4.0 and 2.9 Hz, 1H, H-2), 4.57-4.52 (m, 1H, H-13), 4.33 (t,  $J$  = 8.2 Hz, 1H, H-14<sup>A</sup>), 4.17 (dd,  $J$  = 8.9 and 2.2 Hz, 1H, H-14<sup>B</sup>), 4.02 (qd,  $J$  = 7.0 and 3.4 Hz, 1H, H-1), 3.64 (s, 3H, OMe), 3.29 (dd,  $J$  = 13.3 and 3.4 Hz, 1H, H-12<sup>A</sup>), 2.79 (dd,  $J$  = 13.4 and 9.6 Hz, 1H, H-12<sup>B</sup>), 2.17 (t,  $J$  = 7.1 Hz, 2H, H-8), 1.73-1.64 (m, 1H, H-3<sup>A</sup>), 1.59-1.50 (m, 1H, H-3<sup>B</sup>), 1.45-1.38 (m, 2H, H-7), 1.35-1.20 (m, 5H), 1.24 (d,  $J$  = 7.0 Hz, 3H, H-11), 1.20-1.04 (m, 1H), 0.15 (s, 9H, SiMe<sub>3</sub>).

<sup>5</sup> T. R. Hoye, C. S. Jeffrey and F. Shao, *Nature Protocols.*, 2007, 2, 2451.

**Compound SI-12.** This compound was prepared from **SI-6** (25 mg, 0.050 mmol) and **SI-14** (17  $\mu$ L, 0.095 mmol) using the same procedure as described for the preparation of **SI-11**. Colourless oil (16 mg, 48%).  $^1\text{H-NMR}$  (500 MHz,  $\text{CDCl}_3$ )  $\delta$  7.58-7.54 (m, 2H, ArH), 7.43-7.39 (m, 3H, ArH), 7.36-7.31 (m, 2H, ArH), 7.30-7.27 (m, 1H, ArH), 7.20-7.17 (m, 2H, ArH), 5.45-5.40 (m, 1H, H-2), 4.60-4.54 (m, 1H, H-13), 4.28 (t,  $J=8.3$  Hz, 1H, H-14<sup>A</sup>), 4.17 (dd,  $J=9.1$  and 2.3 Hz, 1H, H-14<sup>B</sup>), 4.00 (qd,  $J=7.0$  and 3.4 Hz, 1H, H-1), 3.55 (s, 3H, OMe), 3.28 (dd,  $J=13.4$  and 3.4 Hz, 1H, H-12<sup>A</sup>), 2.76 (dd,  $J=13.4$  and 9.8 Hz, 1H, H-12<sup>B</sup>), 2.21 (t,  $J=7.2$  Hz, 2H, H-8), 1.84-1.75 (m, 1H, H-3<sup>A</sup>), 1.70-1.62 (m, 1H, H-3<sup>B</sup>), 1.52-1.45 (m, 2H, H-7), 1.40-1.26 (m, 6H), 1.17 (d,  $J=7.0$  Hz, 3H, H-11), 0.15 (s, 9H,  $\text{SiMe}_3$ ).

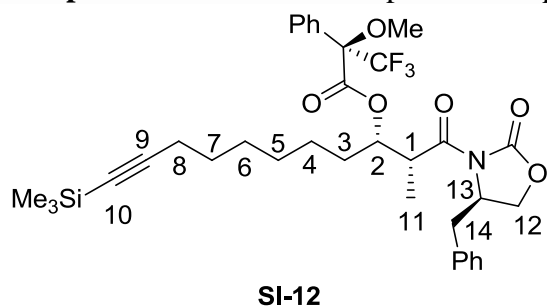

|                   | <b>SI-11</b>   | <b>SI-12</b>   | $\Delta\delta^{\text{SR}} (= \delta_{\text{SI-11}} - \delta_{\text{SI-12}})$ |       |
|-------------------|----------------|----------------|------------------------------------------------------------------------------|-------|
|                   | $\delta$ (ppm) | $\delta$ (ppm) | ppm                                                                          | Hz    |
| OMe               | 3.64           | 3.55           | +0.09                                                                        | +45   |
| H-11              | 1.23           | 1.17           | +0.06                                                                        | +30   |
| H-14 <sup>A</sup> | 4.33           | 4.28           | +0.044                                                                       | +22   |
| H-1               | 4.03           | 3.99           | +0.028                                                                       | +14   |
| H-12 <sup>A</sup> | 3.30           | 3.28           | +0.018                                                                       | +9    |
| H-14 <sup>B</sup> | 4.18           | 4.17           | +0.008                                                                       | +4    |
| H-2               | 5.43           | 5.43           | +0.007                                                                       | +3.5  |
| $\text{SiMe}_3$   | 0.15           | 0.15           | +0.005                                                                       | +2.5  |
| H-12 <sup>B</sup> | 2.79           | 2.79           | -0.003                                                                       | -1.5  |
| H-13              | 4.55           | 4.57           | -0.027                                                                       | -13.5 |
| H-8               | 2.17           | 2.21           | -0.034                                                                       | -17   |
| H-7               | 1.42           | 1.48           | -0.06                                                                        | -30   |
| H-3 <sup>A</sup>  | 1.69           | 1.79           | -0.102                                                                       | -51   |
| H-3 <sup>B</sup>  | 1.54           | 1.67           | -0.133                                                                       | -66.5 |

## Preparation of intermediate 4

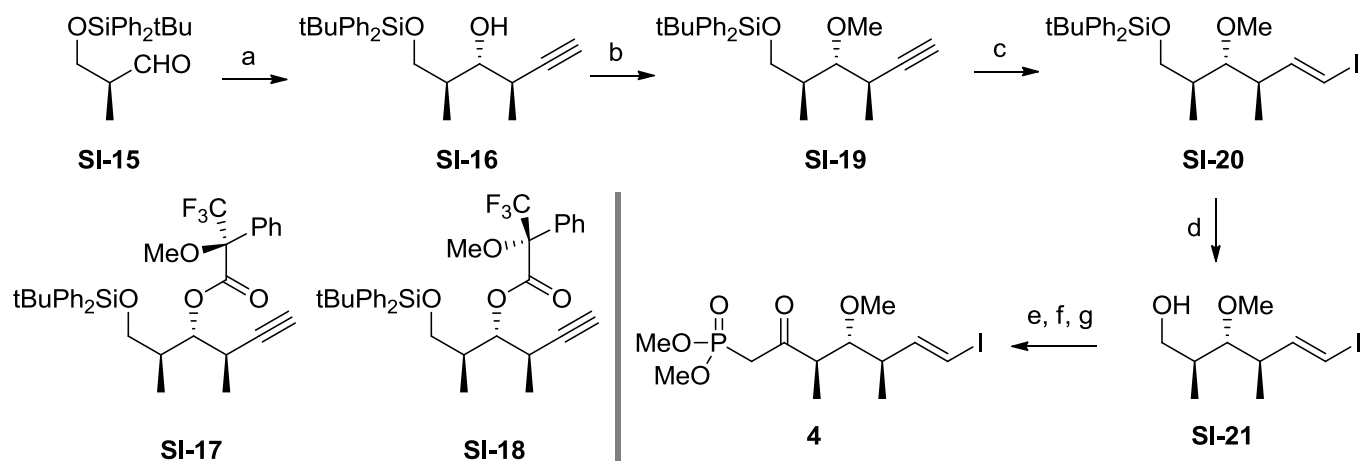

(<sup>a</sup>) Pd(OAc)<sub>2</sub>, PPh<sub>3</sub>, (*S*)-but-3-yn-2-yl methanesulfonate, Et<sub>2</sub>Zn, THF. (<sup>b</sup>) NaH, MeI, THF. (<sup>c</sup>) i) Cp<sub>2</sub>ZrHCl, THF; ii) *N*-iodosuccinimide. (<sup>d</sup>) Tetrabutylammonium fluoride, THF. (<sup>e</sup>) Dess-Martin periodinane, NaHCO<sub>3</sub>, CH<sub>2</sub>Cl<sub>2</sub>. (<sup>f</sup>) dimethyl methylphosphonate, nBuLi, THF. (<sup>g</sup>) Dess-Martin periodinane, NaHCO<sub>3</sub>, CH<sub>2</sub>Cl<sub>2</sub>.

**Compound SI-16.** Under N<sub>2</sub>, Pd(OAc)<sub>2</sub> (97 mg, 0.435 mmol, 5 mol%) was dissolved in degassed THF (90 mL). The reaction was cooled to -78 °C, then PPh<sub>3</sub> (113 mg, 0.435 mmol, 5 mol%), **SI-21**<sup>6</sup> (2.84 g, 8.7 mmol) in THF (5 mL) and (*S*)-but-3-yn-2-yl methanesulfonate<sup>7</sup> (1.54 g, 10.4 mmol) were added. Et<sub>2</sub>Zn (26.1 mL, 26.1 mmol, 1M in hexane) was then added dropwise to the reaction mixture which was stirred for ten minutes at -78 °C before warming to -20 °C. The reaction was stirred at this temperature for 16 hours. The reaction mixture was poured into a stirred mixture of NH<sub>4</sub>Cl (100 mL) and Et<sub>2</sub>O (100 mL) and stirred for 30 minutes. The layers were separated and the aqueous phase washed with Et<sub>2</sub>O (100 mL). The combined organics were washed with brine (100 mL), dried (Na<sub>2</sub>SO<sub>4</sub>), stirred with charcoal, and filtered through silica on a Celite plug. The solvent was removed under reduced pressure. Purification by flash column chromatography on silica gel (petroleum ether/Et<sub>2</sub>O, 20:1 to 10:1) afforded **SI-16** as a colourless oil (2.74 g, 7.23 mmol, 83%). <sup>1</sup>H-NMR (500 MHz, CDCl<sub>3</sub>) δ 7.73-7.70 (m, 4H), 7.49-7.40 (m, 6H), 3.80 (dd, *J* = 10.2 and 4.6 Hz, 1H), 3.72 (dd, *J* = 10.2 and 7.4 Hz, 1H), 3.53 (d, *J* = 4.6 Hz, 1H), 3.46-3.42 (m, 1H), 2.75-2.70 (m, 1H), 2.12 (d, *J* = 2.3 Hz, 1H), 2.11-2.04 (m, 2H), 1.34 (d, *J* = 7.3 Hz, 3H), 1.08 (s, 9H), 0.87 (d, *J* = 6.9 Hz, 3H), in agreement with literature data.<sup>8</sup> [ $\alpha$ ]<sub>D</sub><sup>20</sup> = +20.1 (*c* = 1.0, CHCl<sub>3</sub>).<sup>8</sup>

Mosher esters **SI-17** and **SI-18** of **SI-16** were prepared for confirmation of its stereochemistry.

**Compound SI-17.** This compound was prepared from **SI-16** (21 mg, 0.056 mmol) and **SI-13** (20 μL, 0.107 mmol) using the same procedure as described for the preparation of **SI-11**. Purification by flash column chromatography on silica gel (petroleum ether/Et<sub>2</sub>O, 50:1 to 20:1) afforded **SI-17** as a colourless oil (10.4 mg, 31%). <sup>1</sup>H-NMR (500 MHz, CDCl<sub>3</sub>) δ 7.65-7.58 (m, 6H, ArH), 7.47-7.33 (m, 7H, ArH), 7.30-7.26 (m, 2H, ArH), 5.19 (dd, *J* = 7.0 and 4.8 Hz, 1H, H<sup>3</sup>), 3.61 (dd, *J* = 10.3 and 5.2 Hz, 1H, H<sup>1A</sup>), 3.51 (s, 3H, OMe), 3.45 (dd, *J* = 10.2 and 6.4 Hz, 1H, H<sup>1B</sup>), 2.99 (qdd, *J* = 7.2, 4.8 and 2.5 Hz, 1H, H<sup>4</sup>), 2.25-2.18 (m, 1H, H<sup>2</sup>), 2.07 (d, *J* = 2.5 Hz, 1H, H<sup>6</sup>), 1.22 (d, *J* = 7.2 Hz, 3H, H<sup>8</sup>), 1.07 (s, 9H, <sup>t</sup>Bu),

<sup>6</sup> F. Arikan, J. Li and D. Menche, *Org. Lett.*, 2008, **10**, 3521.

<sup>7</sup> C. J. Elsevier, P. Vermeer, A Gedanken and W. Runge, *J. Org. Chem.*, 1985, **50**, 364.

<sup>8</sup> [ $\alpha$ ]<sub>D</sub><sup>20</sup> = -17.0 (*c* = 1.5, CHCl<sub>3</sub>) was reported for the enantiomer of **SI-22**, see J. A. Marshall and B. A. Johns, *J. Org. Chem.*, 2000, **65**, 1501.



0.98 (d,  $J = 7.0$  Hz, 3H, H<sup>7</sup>).

**Compound SI-18.** This compound was prepared from **SI-16** (17 mg, 0.045 mmol) and **SI-14** (16  $\mu$ L, 0.085 mmol) using the same procedure as described for the preparation of **SI-11**.

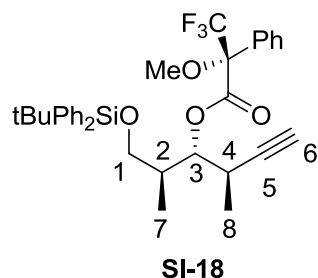

afforded **SI-18** as a colourless oil (10 mg, 37%). <sup>1</sup>H-NMR (500 MHz, CDCl<sub>3</sub>)  $\delta$  7.66-7.63 (m, 4H, ArH), 7.57 (d,  $J = 7.4$  Hz, 2H, ArH), 7.46-7.31 (m, 9H, ArH), 5.18 (dd,  $J = 6.9$  and 4.7 Hz, 1H, H<sup>3</sup>), 3.67 (dd,  $J = 10.4$  and 5.0 Hz, 1H, H<sup>1A</sup>), 3.50 (dd,  $J = 10.4$  and 6.4 Hz, 1H, H<sup>1B</sup>), 3.43 (s, 3H, OMe), 2.94 (qdd,  $J = 7.2$ , 4.7 and 2.4 Hz, 1H, H<sup>4</sup>), 2.28-2.20 (m, 1H, H<sup>2</sup>), 1.97 (d,  $J = 2.4$  Hz, 1H, H<sup>6</sup>), 1.14 (d,  $J = 7.2$  Hz, 3H, H<sup>8</sup>), 1.07 (s, 9H, <sup>t</sup>Bu), 1.04 (d,  $J = 7.0$  Hz, 3H, H<sup>7</sup>).

|                 | <b>SI-17</b><br>$\delta$ (ppm) | <b>SI-18</b><br>$\delta$ (ppm) | $\Delta\delta^{\text{SR}}$ ( $=\delta_{\text{SI-17}}-\delta_{\text{SI-18}}$ ) |     |
|-----------------|--------------------------------|--------------------------------|-------------------------------------------------------------------------------|-----|
|                 |                                |                                | ppm                                                                           | Hz  |
| H <sup>6</sup>  | 2.07                           | 1.97                           | +0.1                                                                          | +47 |
| OMe             | 3.51                           | 3.43                           | +0.08                                                                         | +40 |
| H <sup>8</sup>  | 1.22                           | 1.14                           | +0.08                                                                         | +36 |
| H <sup>4</sup>  | 2.99                           | 2.94                           | +0.05                                                                         | +26 |
| H <sup>3</sup>  | 5.19                           | 5.18                           | +0.01                                                                         | +9  |
| <sup>t</sup> Bu | 1.07                           | 1.07                           | 0                                                                             | 0   |
| H <sup>2</sup>  | 2.22                           | 2.24                           | -0.02                                                                         | -13 |
| H <sup>1B</sup> | 3.45                           | 3.50                           | -0.05                                                                         | -30 |
| H <sup>1A</sup> | 3.61                           | 3.67                           | -0.06                                                                         | -32 |
| H <sup>7</sup>  | 0.98                           | 1.04                           | -0.06                                                                         | -32 |

**Compound SI-19.** Sodium hydride (560 mg, 14.0 mmol, 60% dispersion in mineral oil) was added to a solution of **SI-16** (2.65 g, 7.0 mmol) and iodomethane (5.9 mL, 42.0 mmol) in THF (70 ml) at 0 °C under N<sub>2</sub>. The reaction was slowly warmed to room temperature and stirred for 4 hours. The reaction was carefully quenched with saturated aqueous NH<sub>4</sub>Cl (50 mL) and extracted with EtOAc (3  $\times$  100 mL). The combined organic layers were dried (Na<sub>2</sub>SO<sub>4</sub>) and stirred over charcoal before filtration and removal of the solvent under reduced pressure. Purification by flash column chromatography on silica gel (petroleum ether/Et<sub>2</sub>O, 20:1) afforded **SI-19** as a pale yellow oil (2.40 g, 87%).



as a pale yellow oil (2.40 g, 87%). <sup>1</sup>H-NMR (500 MHz, CDCl<sub>3</sub>)  $\delta$  7.72-7.67 (m, 4H), 7.47-7.43 (m, 2H), 7.42-7.38 (m, 4H), 3.86 (dd,  $J = 9.9$  and 4.8 Hz, 1H), 3.70 (dd,  $J = 9.9$  and 3.6 Hz, 1H), 3.47 (s, 3H), 3.10 (dd,  $J = 8.5$  and 3.6 Hz, 1H), 2.80-2.75 (m, 1H), 2.08 (d,  $J = 2.4$  Hz, 1H), 2.07-1.99 (m, 2H), 1.31 (d,  $J = 7.0$  Hz, 3H), 1.10 (m, 9H), 1.03 (d,  $J = 7.0$  Hz, 3H); <sup>13</sup>C-NMR (125 MHz, CDCl<sub>3</sub>)  $\delta = 135.7$  (2C), 135.6 (2C), 133.8, 133.7, 129.6 (2C), 127.56 (2C), 127.55 (2C), 85.7, 85.0, 69.7, 65.3, 61.0, 39.1, 29.0, 26.9 (3C), 19.3, 18.2, 14.4; IR (neat):  $\tilde{\nu} = 3309$ , 3071, 2960, 2931, 2857, 1589, 1472, 1427, 1389, 1391, 1191, 1111, 1089, 1007, 936, 823, 739, 702 cm<sup>-1</sup>; MS (ES<sup>+</sup>)  $m/z$  (rel. intensity) 417 (100 %, [M+Na]<sup>+</sup>); HRMS calcd for C<sub>25</sub>H<sub>34</sub>O<sub>2</sub>SiNa 417.2226, found 417.2242;  $[\alpha]_D^{20} = -11.3$  ( $c = 1.1$ , CHCl<sub>3</sub>).

**Compound SI-20.** A solution of **SI-19** (2.40 g, 6.10 mmol) in THF (5 mL) was added dropwise to a stirred suspension of Cp<sub>2</sub>ZrHCl (2.04 g, 7.94 mmol) in THF (60 mL) at 0 °C in the dark and under N<sub>2</sub>. The reaction was stirred for 90 minutes at 0 °C. *N*-iodosuccinimide (2.73 g, 12.2 mmol) was then added in one portion and the mixture was stirred for 30 minutes. Saturated aqueous Na<sub>2</sub>S<sub>2</sub>O<sub>3</sub> solution (50 mL) was added and after 15 minutes stirring at room temperature, the reaction mixture was extracted with EtOAc (3  $\times$  70 mL). The combined organic layers were washed with brine (50 mL), dried (Na<sub>2</sub>SO<sub>4</sub>) and the solvent removed under reduced pressure. Purification by flash column chromatography on silica gel (petroleum ether/Et<sub>2</sub>O, 100:0 to 30:1) afforded **SI-20** as a pale yellow gum (2.29 g, 75%).



as a pale yellow gum (2.29 g, 75%). <sup>1</sup>H-NMR (500 MHz, CDCl<sub>3</sub>)  $\delta$  7.66-7.62 (m, 4H), 7.42-7.34 (m, 6H), 6.50 (dd,  $J = 14.4$

and 8.6 Hz, 1H), 5.94 (d,  $J = 14.4$  Hz, 1H), 3.71 (dd,  $J = 9.9$  and 5.3 Hz, 1H), 3.63 (dd,  $J = 9.9$  and 4.0 Hz, 1H), 3.35 (s, 3H), 2.97 (dd,  $J = 7.8$  and 3.5 Hz, 1H), 2.47-2.39 (m, 1H), 1.77-1.68 (m, 1H), 1.05-1.04 (m, 12H), 0.89 (d,  $J = 6.9$  Hz, 3H);  $^{13}\text{C}$ -NMR (125 MHz,  $\text{CDCl}_3$ )  $\delta = 148.2, 135.70$  (2C), 135.65 (2C), 133.8, 133.7, 129.6, 129.5, 127.6 (4C), 86.1, 74.7, 65.3, 61.1, 43.1, 38.7, 26.9 (3C), 19.3, 17.7, 14.2; IR (neat):  $\tilde{\nu} = 3070, 3048, 2960, 2929, 2894, 2857, 1600, 1589, 1471, 1460, 1427, 1389, 1361, 1268, 1240, 1180, 1138, 1103, 1092, 1066, 1008, 971, 952, 907, 863, 822, 791, 738, 698$   $\text{cm}^{-1}$ ; MS ( $\text{ES}^+$ )  $m/z$  (rel. intensity) 545 (100 %,  $[\text{M}+\text{Na}]^+$ ); HRMS calcd for  $\text{C}_{25}\text{H}_{35}\text{IO}_2\text{SiNa}$  545.1349, found 545.1364;  $[\alpha]_D^{20} = -1.9$  ( $c = 0.65$ ,  $\text{CHCl}_3$ ).

**Compound SI-21.** TBAF (2.0 mL, 2.04 mmol, 1M in THF) was added to **SI-20** (510 mg, 1.02 mmol) in THF (5 mL) at 0 °C under  $\text{N}_2$ . The reaction was stirred at room temperature for 16 hours. The volatiles were removed under reduced pressure and the crude residue was purified by flash column chromatography on silica gel (petroleum ether/ $\text{Et}_2\text{O}$ , 10:1 to 4:1 to 1:1) to yield **SI-21** as a colourless oil (223 mg, 77%).  $^1\text{H}$ -NMR (500 MHz,  $\text{CDCl}_3$ )  $\delta$  6.56 (dd,  $J = 14.5$  and 8.4 Hz, 1H), 6.07 (d,  $J = 14.5$  Hz, 1H), 3.70-3.59 (m, 2H), 3.48 (s, 3H), 2.95 (dd,  $J = 7.5$  and 4.4 Hz, 1H), 2.57 (dd,  $J = 6.5$  and 4.7 Hz, 1H(OH)), 2.54-2.47 (m, 1H), 1.85-1.76 (m, 1H), 1.10 (d,  $J = 7.1$  Hz, 3H), 0.93 (d,  $J = 7.0$  Hz, 3H);  $^{13}\text{C}$ -NMR (125 MHz,  $\text{CDCl}_3$ )  $\delta = 147.9, 89.9, 75.3, 66.1, 61.4, 43.6, 37.7, 16.9, 14.8$ ; IR (neat):  $\tilde{\nu} = 3397$  (br), 3047, 2963, 2929, 2828, 1600, 1455, 1427, 1372, 1268, 1178, 1149, 1060, 1031, 969, 952, 905, 859, 820, 741, 702  $\text{cm}^{-1}$ ; MS ( $\text{CI}(\text{NH}_3)$ )  $m/z$  (rel. intensity) 285 (100 %,  $[\text{M}+\text{H}]^+$ ); HRMS calcd for  $\text{C}_9\text{H}_{17}\text{IO}_2$  285.0346, found 285.0349;  $[\alpha]_D^{20} = -11.2$  ( $c = 0.9$ ,  $\text{CHCl}_3$ ).

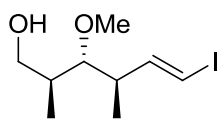

**SI-21**

**Compound 4.** Dess-Martin periodinane (958 mg, 2.94 mmol) was added in one portion to **SI-21** (642 mg, 2.26 mmol) and  $\text{NaHCO}_3$  (379 mg, 4.52 mmol) in  $\text{CH}_2\text{Cl}_2$  (23 mL, 0.1M) at 0 °C. The reaction was stirred at room temperature for 2 hours. Saturated aqueous  $\text{NaHCO}_3$  (10 mL) and saturated aqueous  $\text{Na}_2\text{S}_2\text{O}_3$  (10 mL) were added. After stirring for 15 minutes, the mixture was diluted with  $\text{CH}_2\text{Cl}_2$  (30 mL), and the aqueous layer washed with  $\text{CH}_2\text{Cl}_2$  ( $2 \times 50$  mL). The combined organic phases were dried ( $\text{Na}_2\text{SO}_4$ ) and concentrated under reduced pressure. The crude aldehyde was used without further purification in the next step. A solution of  $^n\text{BuLi}$  (2.4 mL, 6.10 mmol, 2.5M in hexanes) was added dropwise to freshly distilled dimethyl methylphosphonate (0.60 mL, 5.65 mmol) in THF (22 mL) at -78 °C under  $\text{N}_2$ . The cloudy solution was stirred at this temperature for 30 minutes and a solution of the aldehyde obtained previously in THF (2 mL) was added dropwise to give a yellow solution. The reaction was stirred at -78 °C for 1 hour and quenched by addition of saturated aqueous  $\text{NH}_4\text{Cl}$  (50 mL). The reaction was warmed to room temperature and extracted with  $\text{EtOAc}$  ( $3 \times 70$  mL). The combined organic layers were dried ( $\text{Na}_2\text{SO}_4$ ) and the solvent removed under reduced pressure. Purification by flash column chromatography on silica gel (petroleum ether/ $\text{Et}_2\text{O}$ , 2:1 to 0:1) afforded a secondary alcohol (0.832 g, 73 % over two steps, pale yellow oil, 1:1 mixture of diastereoisomers). Dess-Martin periodinane (869 mg, 2.05 mmol) was added in one portion to a fraction of this material (800 mg, 1.58 mmol) and  $\text{NaHCO}_3$  (265 mg, 3.16 mmol) in  $\text{CH}_2\text{Cl}_2$  (16 mL) at 0 °C, as described above. After the same aqueous work-up as described above, purification by flash chromatography on silica gel (petroleum ether/ $\text{EtOAc}$ , 4:1 to  $\text{EtOAc}$  only) afforded **4** as colourless oil (701 mg, 87%).  $^1\text{H}$ -NMR (500 MHz,  $\text{CDCl}_3$ )  $\delta$  6.53 (dd,  $J = 14.5$  and 9.0 Hz, 1H), 6.03 (d,  $J = 14.5$  Hz, 1H), 3.80 (d,  $J_P = 9.0$  Hz, 3H), 3.78 (d,  $J_P = 9.0$  Hz, 3H), 3.28 (s, 3H), 3.27 (dd,  $J = 22.0$  and 14.5 Hz, 1H), 3.13 (dd,  $J = 9.5$  and 9.0 Hz, 1H), 3.07 (dd,  $J = 22.0$  and 14.5 Hz, 1H), 2.88 (dq,  $J = 9.0$  and 7.0 Hz, 1H), 2.39 (ddq,  $J = 14.3, 7.0$  and 2.9 Hz, 1H), 1.08 (d,  $J = 7.0$  Hz, 3H), 0.94 (d,  $J = 7.0$  Hz, 3H);  $^{13}\text{C}$ -NMR (125 MHz,  $\text{CDCl}_3$ )  $\delta = 205.7$  (d,  $J_P = 7.5$  Hz), 146.8, 87.5, 75.8, 61.2, 53.0 (d,  $J_P = 23.8$  Hz), 52.9 (d,  $J_P = 23.1$  Hz), 49.5, 43.1, 42.8 (d,  $J_P = 128.5$  Hz), 17.2, 13.3; IR (neat):  $\tilde{\nu} = 2929, 2850, 1712, 1601, 1456, 1374, 1351, 1255, 1179, 1088, 971, 954, 925, 880, 808, 738, 705$   $\text{cm}^{-1}$ ; MS ( $\text{ES}^+$ )  $m/z$  (rel. intensity) 427 (100 %,  $[\text{M}+\text{Na}]^+$ ); HRMS calcd for  $\text{C}_{12}\text{H}_{22}\text{O}_5\text{IPNa}$  427.0147, found 427.0161;  $[\alpha]_D^{20} = -99.1$  ( $c = 1.14$ ,  $\text{CHCl}_3$ ).

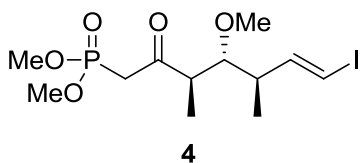

**4**

### Preparation of compounds 5a–5c, 6a–6c and 7a–7c

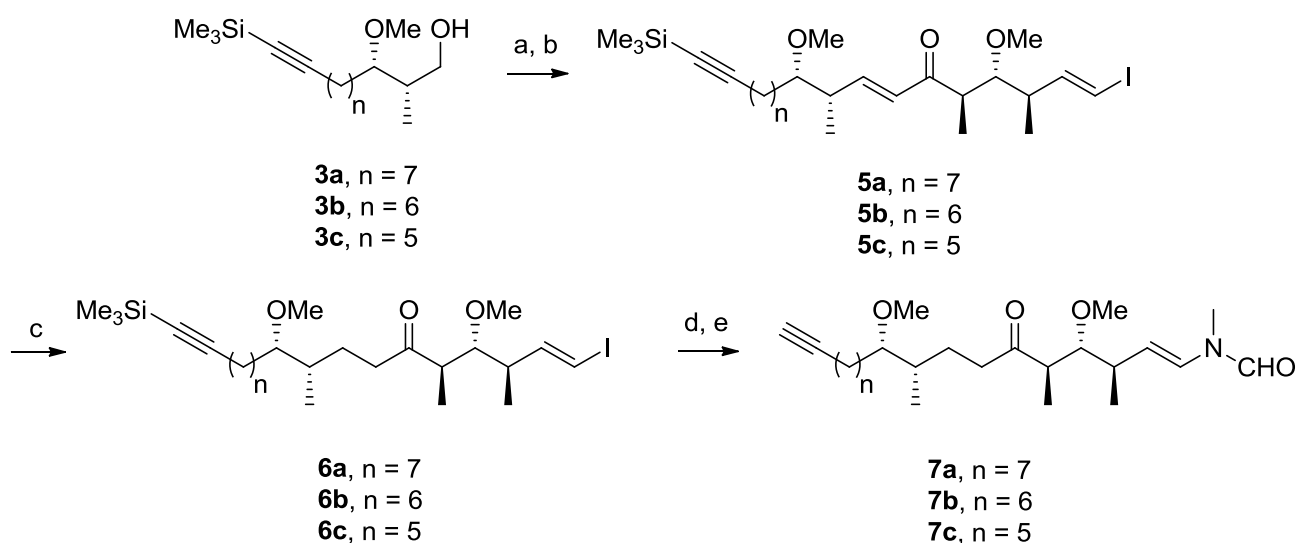

(a) Dess-Martin periodinane, NaHCO<sub>3</sub>, CH<sub>2</sub>Cl<sub>2</sub>. (b) i) **4**, Ba(OH)<sub>2</sub>, THF; ii) aldehydes, THF/water (40:1), rt. (c) [CuHPPH<sub>3</sub>]<sub>6</sub>, toluene, water. (d) CuI (0.2 equiv), 1,2-*trans*-cyclohexyldiamine (0.4 equiv), K<sub>3</sub>PO<sub>4</sub> (2 equiv), MeNCHO (10 equiv), 1,4-dioxane, 80 °C. (e) AgNO<sub>3</sub> (4 equiv), THF/EtOH/water/2,6-lutidine (1:1:1:0.1), rt, 48h.

**Compound 5a.** This compound was prepared from **3a** (108 mg, 0.36 mmol) using the same procedure as

described for the preparation of **5c**. Colourless oil (121 mg, 59% over two steps). <sup>1</sup>H-NMR (500 MHz, CDCl<sub>3</sub>) δ 6.88 (dd,  $J = 16.0$  and  $7.5$  Hz, 1H), 6.60 (dd,  $J = 14.6$  and  $9.2$  Hz, 1H), 6.16 (dd,  $J = 16.0$  and  $0.9$  Hz, 1H), 6.07 (d,  $J = 14.6$  Hz, 1H), 3.37 (s, 3H), 3.31-3.27 (m, 4H (MeO + 1H)), 3.11-3.07 (m, 1H), 2.96 (dq,  $J = 9.5$  and  $7.0$  Hz, 1H), 2.63-2.55 (m, 1H), 2.48-2.40 (m, 1H), 2.20 (t,  $J = 7.2$  Hz, 2H), 1.53-1.46 (m, 2H), 1.45-1.21 (m, 10H), 1.12 (d,  $J = 7.6$  Hz, 3H), 1.07 (d,  $J = 7.1$  Hz, 3H), 0.94 (d,  $J = 7.1$  Hz, 3H), 0.14 (s, 9H); <sup>13</sup>C-NMR (125 MHz, CDCl<sub>3</sub>) δ = 203.2, 149.9, 147.1, 129.8, 107.6, 86.6, 84.4, 84.2, 75.4, 61.1, 57.8, 46.4, 43.1, 39.6, 31.3, 29.6, 29.0, 28.7, 28.6, 25.6, 19.8, 17.6, 14.7, 13.8, 0.1 (3C); IR (neat):  $\tilde{\nu} = 2931, 2856, 2173, 1693, 1668, 1624, 1456, 1373, 1248, 1179, 1093, 971, 953, 841, 759, 698$  cm<sup>-1</sup>; MS (ES<sup>+</sup>)  $m/z$  (rel. intensity) 597 (100 %, [M+Na]<sup>+</sup>); HRMS (ES<sup>+</sup>) calcd for C<sub>27</sub>H<sub>47</sub>IO<sub>3</sub>SiNa 597.2237, found 597.2235;  $[\alpha]_D^{20} = -92.3$  ( $c = 1.02$ , CHCl<sub>3</sub>).

**Compound 5b.** This compound was prepared from **3b** (65 mg, 0.23 mmol) using the same procedure as

described for the preparation of **5c**. Colourless oil (79 mg, 46% over two steps). <sup>1</sup>H-NMR (500 MHz, CDCl<sub>3</sub>) δ 6.86 (dd,  $J = 15.9$  and  $7.8$  Hz, 1H), 6.60 (dd,  $J = 14.7$  and  $9.5$  Hz, 1H), 6.17 (dd,  $J = 15.9$  and  $1.2$  Hz, 1H), 6.07 (d,  $J = 14.7$  Hz, 1H), 3.37 (s, 3H), 3.30 (s, 3H), 3.30-3.27 (m, 1H), 3.12-3.07 (m, 1H), 2.96 (dq,  $J = 9.9$  and  $6.8$  Hz, 1H), 2.63-2.56 (m, 1H), 2.45 (dq,  $J = 9.0, 7.0$  and  $2.6$  Hz, 1H), 2.20 (t,  $J = 7.0$  Hz, 2H), 1.58-1.47 (m, 2H), 1.45-1.34 (m, 6H), 1.33-1.26 (m, 2H), 1.12 (d,  $J = 6.7$  Hz, 3H), 1.08 (d,  $J = 6.7$  Hz, 3H), 0.95 (d,  $J = 7.0$  Hz, 3H), 0.14 (s, 9H); <sup>13</sup>C-NMR (125 MHz, CDCl<sub>3</sub>) δ = 203.1, 149.8, 147.2, 129.8, 107.6, 86.7, 84.4, 84.3, 75.4, 61.2, 57.9, 46.4, 43.2, 39.6, 31.3, 29.2, 28.7, 28.6, 25.6, 19.8, 17.6, 14.7, 13.8, 0.2 (3C); IR (neat):  $\tilde{\nu} = 2932, 2857, 2172, 1692, 1667, 1623, 1456, 1373, 1354, 1248, 1179, 1093, 971, 953, 842, 760, 733, 697$  cm<sup>-1</sup>; MS (ES<sup>+</sup>)  $m/z$  (rel. intensity) 583 (100 %, [M+Na]<sup>+</sup>); HRMS calcd for C<sub>26</sub>H<sub>45</sub>IO<sub>3</sub>SiNa 583.2080, found 583.2079;  $[\alpha]_D^{20} = -76.6$  ( $c = 1.33$ , CHCl<sub>3</sub>).

**Compound 5c.** Dess-Martin periodinane (369 mg, 0.87 mmol) was added in one portion to **3c** (127 mg, 0.47 mmol) and NaHCO<sub>3</sub> (79 mg, 0.94 mmol) in CH<sub>2</sub>Cl<sub>2</sub> (5 mL) at 0 °C. The reaction was stirred at room temperature for 2 hours. Saturated aqueous NaHCO<sub>3</sub> (10 mL) and saturated aqueous Na<sub>2</sub>S<sub>2</sub>O<sub>3</sub> (10 mL) were added. After stirring for 15 minutes, the mixture was diluted with CH<sub>2</sub>Cl<sub>2</sub> (30 mL), and

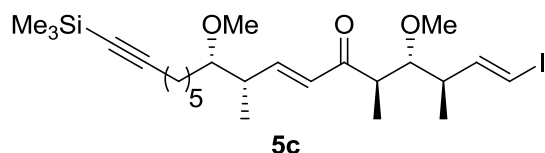

the aqueous layer washed with CH<sub>2</sub>Cl<sub>2</sub> (2 × 30 mL). The combined organic phases were dried (Na<sub>2</sub>SO<sub>4</sub>) and concentrated under reduced pressure. The crude aldehyde thus obtained was passed through a short silica plug (eluting with 10:1 petroleum ether/Et<sub>2</sub>O) to remove residual impurities and was used without further purification (100 mg, 0.37 mmol) in the next step. Under N<sub>2</sub>, Ba(OH)<sub>2</sub> (70 mg, 0.41 mmol)<sup>9</sup> was added to **4** (150 mg, 0.37 mmol) in THF (3 mL). The mixture was stirred for 30 minutes at room temperature, before adding the aldehyde prepared above (100 mg, 0.37 mmol) as a THF/H<sub>2</sub>O (40:1, 1 mL) solution. After stirring for 1 hour, the reaction was diluted with CH<sub>2</sub>Cl<sub>2</sub> (10 mL) and saturated aqueous NaHCO<sub>3</sub> (10 mL) was added and the mixture was stirred for 15 minutes. The mixture was separated and the aqueous layer washed with CH<sub>2</sub>Cl<sub>2</sub> (2 × 20 mL). The combined organic layers were dried (Na<sub>2</sub>SO<sub>4</sub>) and the solvent removed under reduced pressure. Purification by flash column chromatography (SiO<sub>2</sub>, petroleum ether/Et<sub>2</sub>O, 4:1) yielded **5c** as a colourless oil (142 mg, 55% over two steps). <sup>1</sup>H-NMR (500 MHz, CDCl<sub>3</sub>) δ 6.85 (dd, *J* = 15.9 and 7.6 Hz, 1H), 6.59 (dd, *J* = 14.6 and 9.3 Hz, 1H), 6.16 (dd, *J* = 15.9 and 1.0 Hz, 1H), 6.06 (d, *J* = 14.6 Hz, 1H), 3.37 (s, 3H), 3.30 (s, 3H), 3.30-3.26 (m, 1H), 3.12-3.07 (m, 1H), 2.95 (dq, *J* = 9.5 and 7.0 Hz, 1H), 2.64-2.56 (m, 1H), 2.44 (dq, *J* = 9.3, 6.8 and 2.0 Hz, 1H), 2.20 (t, *J* = 7.2 Hz, 2H), 1.51 (quint, *J* = 7.2 Hz, 2H), 1.46-1.26 (m, 6H), 1.12 (d, *J* = 7.0 Hz, 3H), 1.01 (d, *J* = 6.9 Hz, 3H), 0.94 (d, *J* = 7.0 Hz, 3H), 0.13 (s, 9H); <sup>13</sup>C-NMR (125 MHz, CDCl<sub>3</sub>) δ = 203.1, 149.7, 147.2, 129.9, 107.5, 86.6, 84.4, 84.3, 75.4, 61.2, 57.9, 46.4, 43.2, 39.6, 31.3, 28.9, 28.5, 25.2, 19.8, 17.6, 14.7, 13.8, 0.2 (3C); IR (neat):  $\tilde{\nu}$  = 2934, 2830, 2172, 1692, 1667, 1623, 1456, 1373, 1353, 1248, 1179, 1093, 971, 908, 842, 759, 733, 698 cm<sup>-1</sup>; MS (ES<sup>+</sup>) *m/z* (rel. intensity) 569 (100 %, [M+Na]<sup>+</sup>); HRMS calcd for C<sub>25</sub>H<sub>43</sub>IO<sub>3</sub>SiNa 569.1924, found 569.1938; [α]<sub>D</sub><sup>20</sup> = -83.3 (*c* = 1.0, CHCl<sub>3</sub>).

**Compound 6a.** This compound was prepared from **5a** (97 mg, 0.17 mmol) using the same procedure as described for the preparation of **6c**. Colourless oil (68 mg, 70 %).

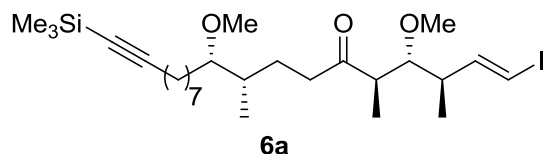

<sup>1</sup>H-NMR (500 MHz, CDCl<sub>3</sub>) δ 6.57 (dd, *J* = 14.6 and 9.1 Hz, 1H), 6.04 (d, *J* = 14.6 Hz, 1H), 3.34 (s, 3H), 3.30 (s, 3H), 3.25 (dd, *J* = 9.6 and 2.4 Hz, 1H), 2.99-2.94 (m, 1H), 2.68 (dq, *J* = 9.6 and 7.0 Hz, 1H), 2.54-2.48 (m, 1H), 2.45-2.37 (m, 1H), 2.20 (t, *J* = 7.2 Hz, 2H), 1.78-1.68 (m, 1H), 1.68-1.60 (m, 1H), 1.55-1.46 (m, 2H), 1.46-1.33 (m, 6H), 1.32-1.23 (m, 6H), 1.11 (d, *J* = 6.9 Hz, 3H), 0.90 (d, *J* = 7.0 Hz, 3H), 0.85 (d, *J* = 6.8 Hz, 3H), 0.14 (s, 9H); <sup>13</sup>C-NMR (125 MHz, CDCl<sub>3</sub>) δ = 214.2, 147.1, 107.8, 86.6, 85.3, 84.3, 75.4, 61.3, 57.9, 48.9, 43.1, 42.3, 34.8, 30.4, 29.8, 29.1, 28.8, 28.7, 26.1, 26.0, 19.9, 17.5, 14.7, 13.5, 0.2 (3C); IR (neat):  $\tilde{\nu}$  = 2930, 2855, 2173, 1713, 1601, 1457, 1407, 1373, 1248, 1179, 1153, 1091, 969, 954, 922, 841, 759, 698 cm<sup>-1</sup>; MS (ES<sup>+</sup>) *m/z* (rel. intensity) 599 (100 %, [M+Na]<sup>+</sup>); HRMS calcd for C<sub>27</sub>H<sub>49</sub>IO<sub>3</sub>SiNa 599.2393, found 599.2384; [α]<sub>D</sub><sup>20</sup> = -53.1 (*c* = 1.0, CHCl<sub>3</sub>).

**Compound 6b.** This compound was prepared from **5b** (55 mg, 0.098 mmol) using the same procedure as

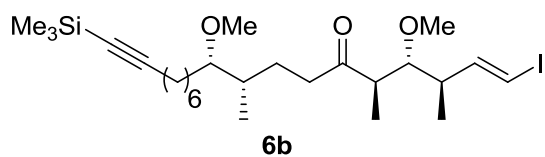

described for the preparation of **6c**. The material thus obtained contained approximately 12% of desilylated analogue and 10% of PPh<sub>3</sub> and was not fully characterised before being used in the following step (colourless oil, 47 mg, yield = 71% after correction). <sup>1</sup>H-NMR (500 MHz, CDCl<sub>3</sub>) δ 6.57 (dd, *J* = 14.6 and 9.1 Hz, 1H), 6.05 (d, *J* = 14.6 Hz, 1H), 3.35 (s, 3H), 3.31 (s, 3H), 3.25 (dd, *J* = 9.6

<sup>9</sup> Ba(OH)<sub>2</sub>·8H<sub>2</sub>O was dried at 120 °C under vacuum for 2h prior to use, see I. Paterson, K.-S. Yeung and J. B. Smiell, *Synlett*, 1993, 774

and 2.4 Hz, 1H), 3.01-2.96 (m, 1H), 2.69 (dq,  $J = 9.6$  and  $7.0$  Hz, 1H), 2.55-2.49 (m, 1H), 2.47-2.38 (m, 1H), 2.21 (t,  $J = 7.2$  Hz, 2H), 1.79-1.70 (m, 1H), 1.69-1.61 (m, 1H), 1.56-1.49 (m, 2H), 1.48 (m, 9H), 1.33-1.23 (m, 2H), 1.12 (d,  $J = 7.0$  Hz, 3H), 0.91 (d,  $J = 7.2$  Hz, 3H), 0.86 (d,  $J = 6.8$  Hz, 3H), 0.14 (s, 9H); HRMS (ES<sup>+</sup>) calcd for C<sub>26</sub>H<sub>47</sub>IO<sub>3</sub>SiNa 585.2237, found 585.2236.

**Compound 6c.** [CuHPPPh<sub>3</sub>]<sub>6</sub> (123 mg, 0.063 mmol) was added to a solution of **5c** (117 mg, 0.21 mmol) in toluene (4.3 mL, 0.05M) followed by deionised H<sub>2</sub>O (38 μL, 2.10 mmol) was added. After stirring at room temperature for 2 hours, the reaction was filtered through deactivated neutral alumina and the solvent removed under reduced pressure.

Purification by flash column chromatography on silica gel (petroleum ether/Et<sub>2</sub>O, 100:1 to 50:1 to 40:1) afforded **6** as a colourless oil (83 mg, contains 12% of desilylated analogue; yield = 64% after correction). <sup>1</sup>H-NMR (500 MHz, CDCl<sub>3</sub>) δ 6.57 (dd,  $J = 14.6$  and  $9.1$  Hz, 1H), 6.05 (d,  $J = 14.6$  Hz, 1H), 3.36 (s, 3H), 3.31 (s, 3H), 3.25 (dd,  $J = 9.8$  and  $2.5$  Hz, 1H), 3.00-2.96 (m, 1H), 2.69 (dq,  $J = 9.6$  and  $7.0$  Hz, 1H), 2.55-2.50 (m, 1H), 2.46-2.39 (m, 1H), 2.22 (t,  $J = 6.7$  Hz, 2H), 1.78-1.70 (m, 1H), 1.69-1.62 (m, 1H), 1.56-1.49 (m, 2H), 1.48 (m, 7H), 1.33-1.23 (m, 2H), 1.12 (d,  $J = 7.0$  Hz, 3H), 0.91 (d,  $J = 7.2$  Hz, 3H), 0.86 (d,  $J = 7.0$  Hz, 3H), 0.15 (s, 9H); <sup>13</sup>C-NMR (125 MHz, CDCl<sub>3</sub>) δ = 214.1, 147.1, 107.6, 86.6, 85.2, 84.3, 75.4, 61.2, 57.8, 48.8, 43.0, 42.3, 34.8, 30.3, 29.0, 28.6, 25.9, 25.6, 19.8, 17.4, 14.7, 13.5, 0.2 (3C); IR (neat):  $\tilde{\nu} = 2933, 2173, 1713, 1601, 1457, 1407, 1373, 1248, 1180, 1155, 1090, 970, 954, 922, 840, 759, 697$  cm<sup>-1</sup>; MS (ES<sup>+</sup>)  $m/z$  (rel. intensity) 571 (100 %, [M+Na]<sup>+</sup>); HRMS calcd for C<sub>25</sub>H<sub>45</sub>IO<sub>3</sub>SiNa 571.2080, found 571.2065;  $[\alpha]_D^{20} = -63.9$  ( $c = 0.9$ , CHCl<sub>3</sub>).

**Compound 7a.**<sup>10</sup> This compound was prepared from **6a** (65 mg, 0.11 mmol) using the same procedure as described for the preparation of **7c**. Colourless oil (29 mg, 60% over 2 steps, d.r. = 90:10).

<sup>1</sup>H-NMR (500 MHz, CDCl<sub>3</sub>) δ 8.27 (s, 0.65H, H<sup>1</sup>), 8.06 (s, 0.35H, H<sup>1</sup>), 7.12 (d,  $J = 14.7$  Hz, 0.35H, H<sup>2</sup>), 6.44 (d,  $J = 14.4$  Hz, 0.65H, H<sup>2</sup>), 5.14-5.06 (m, 1H, H<sup>3</sup>), 3.34 (s, 6H, H<sup>C</sup> + H<sup>F</sup>), 3.35-3.29 (m, 1H, H<sup>5</sup>), 3.06 (s, 1.05H, H<sup>A</sup>), 3.03 (s, 1.95H, H<sup>A</sup>), 2.99-2.94 (m, 1H, H<sup>11</sup>), 2.68 (dq,  $J = 9.7$  and  $7.1$  Hz, 0.65H<sup>6</sup>), 2.65 (dq,  $J = 9.8$  and  $7.0$  Hz, 0.35H<sup>6</sup>), 2.56-2.46 (m, 2H, H<sup>8</sup>), 2.45-2.34 (m, 1H, H<sup>4</sup>), 2.16 (td,  $J = 7.0$  and  $2.6$  Hz, 2H, H<sup>18</sup>), 1.92 (t,  $J = 2.6$  Hz, 1H, H<sup>20</sup>), 1.79-1.70 (m, 1H, H<sup>9a</sup>), 1.69-1.61 (m, 1H, H<sup>10</sup>), 1.57-1.50 (m, 2H, H<sup>17</sup>), 1.47-1.25 (m, 11H, H<sup>9β</sup> + H<sup>12</sup> + H<sup>13</sup> + H<sup>14</sup> + H<sup>15</sup> + H<sup>16</sup>), 1.15 (d,  $J = 6.9$  Hz, 3H, H<sup>B</sup>), 0.91 (d,  $J = 7.0$  Hz, 1.8H, H<sup>D</sup>), 0.90 (d,  $J = 7.0$  Hz, 1.2H, H<sup>D</sup>), 0.85 (d,  $J = 7.0$  Hz, 1.8H, H<sup>E</sup>), 0.84 (d,  $J = 7.0$  Hz, 1.2H, H<sup>E</sup>); <sup>13</sup>C-NMR (125 MHz, CDCl<sub>3</sub>) δ = 214.3 (C<sup>7min</sup>), 214.2 (C<sup>7maj</sup>), 162.1 (C<sup>1maj</sup>), 160.8 (C<sup>1min</sup>), 128.7 (C<sup>2maj</sup>), 124.7 (C<sup>2min</sup>), 113.1 (C<sup>3min</sup>), 111.3 (C<sup>3maj</sup>), 87.4 (C<sup>5min</sup>), 87.3 (C<sup>5maj</sup>), 85.3 (C<sup>11</sup>), 84.7 (C<sup>19</sup>), 68.0 (C<sup>20</sup>), 61.4 (C<sup>Cmin</sup>), 61.3 (C<sup>Cmaj</sup>), 57.7 (C<sup>F</sup>), 49.1 (C<sup>6min</sup>), 49.0 (C<sup>6maj</sup>), 42.3 (C<sup>8maj</sup>), 42.2 (C<sup>8min</sup>), 37.6 (C<sup>4min</sup>), 37.4 (C<sup>4maj</sup>), 35.0 (C<sup>10min</sup>), 34.77 (C<sup>10maj</sup>), 33.1 (C<sup>Amin</sup>), 30.4 (C<sup>12min</sup>), 30.3 (C<sup>12maj</sup>), 29.7 (C<sup>14</sup>), 29.0 (C<sup>15</sup>), 28.7 (C<sup>16</sup>), 28.4 (C<sup>17</sup>), 27.6 (C<sup>Amaj</sup>), 26.06 (C<sup>13</sup>), 26.03 (C<sup>9min</sup>), 26.00 (C<sup>9maj</sup>), 19.4 (C<sup>Bmaj</sup>), 19.3 (C<sup>Bmin</sup>), 18.2 (C<sup>18</sup>), 14.7 (C<sup>Emaj</sup>), 14.6 (C<sup>Emin</sup>), 13.6 (C<sup>Dmin</sup>), 13.5 (C<sup>Dmaj</sup>); IR (neat):  $\tilde{\nu} = 3265, 2930, 2856, 1692, 1653, 1457, 1371, 1318, 1274, 1194, 1155, 1090, 1069, 939, 877, 725, 686$  cm<sup>-1</sup>; MS (ES<sup>+</sup>)  $m/z$  (rel. intensity) 458 (100 %, [M+Na]<sup>+</sup>); HRMS calcd for C<sub>26</sub>H<sub>45</sub>NO<sub>4</sub>Na 458.3246, found 428.3239;  $[\alpha]_D^{20} = -63.3$  ( $c = 1.35$ , CHCl<sub>3</sub>).

**Compound 7b.**<sup>10</sup> This compound was prepared from **6b** (46 mg, 0.082 mmol) using the same procedure as described for the preparation of **7a**. Colourless oil (19 mg, 55% over 2 steps, d.r. = 92:8).

<sup>1</sup>H-NMR (500 MHz, CDCl<sub>3</sub>) δ 8.21 (s, 0.65H, H<sup>1</sup>), 8.06 (s, 0.35H, H<sup>1</sup>), 7.12 (d,  $J = 14.6$  Hz, 0.35H, H<sup>2</sup>), 6.44 (d,  $J = 14.3$  Hz,

0.65H, H<sup>2</sup>), 5.15-5.06 (m, 1H, H<sup>3</sup>), 3.33 (s, 6H, H<sup>C</sup> + H<sup>F</sup>), 3.33-3.29 (m, 1H, H<sup>5</sup>), 3.06 (s, 1.05H, H<sup>A</sup>), 3.03 (s, 1.95H, H<sup>A</sup>), 3.00-2.93 (m, 1H, H<sup>11</sup>), 2.68 (dq,  $J = 9.6$  and  $7.0$  Hz, 0.65H<sup>6</sup>), 2.65 (dq,  $J = 9.7$  and  $7.0$  Hz, 0.35H<sup>6</sup>), 2.56-2.47 (m, 2H, H<sup>8</sup>), 2.47-2.34 (m, 1H, H<sup>4</sup>), 2.18 (td,  $J = 7.0$  and  $2.6$  Hz, 2H, H<sup>17</sup>), 1.94 (t,  $J = 2.6$  Hz, 1H, H<sup>19</sup>), 1.80-1.70 (m, 1H, H<sup>9a</sup>), 1.69-1.61 (m, 1H, H<sup>10</sup>), 1.58-1.50 (m, 2H, H<sup>16</sup>), 1.47-1.25 (m, 9H, H<sup>9b</sup> + H<sup>12</sup> + H<sup>13</sup> + H<sup>14</sup> + H<sup>15</sup>), 1.15 (d,  $J = 7.0$  Hz, 3H, H<sup>B</sup>), 0.92 (d,  $J = 7.0$  Hz, 1.8H, H<sup>D</sup>), 0.91 (d,  $J = 7.0$  Hz, 1.2H, H<sup>D</sup>), 0.85 (d,  $J = 7.0$  Hz, 1.8H, H<sup>E</sup>), 0.84 (d,  $J = 7.0$  Hz, 1.2H, H<sup>E</sup>); <sup>13</sup>C-NMR (125 MHz, CDCl<sub>3</sub>)  $\delta = 214.31$  (C<sup>7min</sup>), 214.25 (C<sup>7maj</sup>), 162.1 (C<sup>1maj</sup>), 160.8 (C<sup>1min</sup>), 128.7 (C<sup>2maj</sup>), 124.7 (C<sup>2min</sup>), 113.1 (C<sup>3min</sup>), 111.3 (C<sup>3maj</sup>), 87.4 (C<sup>5min</sup>), 87.3 (C<sup>5maj</sup>), 85.3 (C<sup>11</sup>), 84.7 (C<sup>18</sup>), 68.1 (C<sup>19</sup>), 61.41 (C<sup>Cmin</sup>), 61.38 (C<sup>Cmaj</sup>), 57.8 (C<sup>F</sup>), 49.1 (C<sup>6min</sup>), 49.0 (C<sup>6maj</sup>), 42.3 (C<sup>8maj</sup>), 42.2 (C<sup>8min</sup>), 37.6 (C<sup>4min</sup>), 37.4 (C<sup>4maj</sup>), 34.77 (C<sup>10min</sup>), 34.74 (C<sup>10maj</sup>), 33.1 (C<sup>Amin</sup>), 30.33 (C<sup>12min</sup>), 30.29 (C<sup>12maj</sup>), 29.3 (C<sup>14</sup>), 28.7 (C<sup>15</sup>), 28.4 (C<sup>16</sup>), 27.6 (C<sup>Amin</sup>), 26.0 (C<sup>9min</sup> + C<sup>13</sup>), 25.97 (C<sup>9maj</sup>), 19.40 (C<sup>Bmaj</sup>), 19.37 (C<sup>Bmin</sup>), 18.4 (C<sup>17</sup>), 14.73 (C<sup>Emaj</sup>), 14.67 (C<sup>Emin</sup>), 13.6 (C<sup>Dmin</sup>), 13.5 (C<sup>Dmaj</sup>); IR (neat):  $\tilde{\nu} = 3262, 2931, 2858, 1693, 1655, 1457, 1371, 1319, 1274, 1194, 1156, 1092, 1070, 938, 726, 686$  cm<sup>-1</sup>; MS (ES<sup>+</sup>)  $m/z$  (rel. intensity) 444 (100 %, [M+Na]<sup>+</sup>); HRMS calcd for C<sub>25</sub>H<sub>43</sub>O<sub>4</sub>Na 444.3090, found 444.3082; [ $\alpha$ ]<sub>D</sub><sup>20</sup> = -102 ( $c = 0.43$ , CHCl<sub>3</sub>).

**Compound 7c.**<sup>10</sup> CuI (2.5 mg, 0.013 mmol), K<sub>3</sub>PO<sub>4</sub> (28 mg, 0.13 mmol), 1,2-trans-cyclohexyldiamine (2.9 mg, 0.025 mmol) and MeNCHO (38 mg, 0.65 mmol) were added to a dried resealable J-Young Schlenk tube in a glovebox. The tube was removed from the glovebox and **6c** (36 mg, 0.065 mmol) in dioxane (2 mL) was added. The tube was then sealed and heated at 80 °C for 16 hours. The reaction was cooled to room temperature, diluted

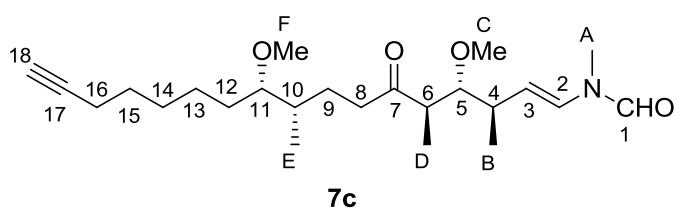

with EtOAc and filtered through a short pad of Celite. The solvent was removed under reduced pressure and the crude residue was diluted in THF:EtOH:H<sub>2</sub>O:2,6-lutidine (2 mL, 1:1:1:0.1) before adding added AgNO<sub>3</sub> (44 mg, 0.26 mmol). The reaction mixture was stirred at room temperature in the dark for 48 hours. The reaction mixture was then diluted and filtered through a pad of Celite. The solvent was removed under reduced pressure. Purification by flash column chromatography on silica gel (petroleum ether/Et<sub>2</sub>O, 2:1 to 1:2) gave **7c** as a colourless oil (11.3 mg, 43% over 2 steps, d.r. = 88:12). <sup>1</sup>H-NMR (500 MHz, CDCl<sub>3</sub>)  $\delta$  8.29 (s, 0.6H, H<sup>1</sup>), 8.08 (s, 0.4H, H<sup>1</sup>), 7.13 (d,  $J = 14.9$  Hz, 0.4H, H<sup>2</sup>), 6.46 (d,  $J = 14.3$  Hz, 0.6H, H<sup>2</sup>), 5.17-5.07 (m, 1H, H<sup>3</sup>), 3.35 (s, 6H, H<sup>C</sup> + H<sup>F</sup>), 3.33-3.29 (m, 1H, H<sup>5</sup>), 3.08 (s, 1.2H, H<sup>A</sup>), 3.04 (s, 1.8H, H<sup>A</sup>), 3.00-2.95 (m, 1H, H<sup>11</sup>), 2.68 (dq,  $J = 9.5$  and  $7.0$  Hz, 0.6H<sup>6</sup>), 2.65 (dq,  $J = 9.8$  and  $7.1$  Hz, 0.4H<sup>6</sup>), 2.56-2.47 (m, 2H, H<sup>8</sup>), 2.47-2.34 (m, 1H, H<sup>4</sup>), 2.19 (td,  $J = 7.1$  and  $2.7$  Hz, 2H, H<sup>16</sup>), 1.94 (t,  $J = 2.7$  Hz, 1H, H<sup>18</sup>), 1.80-1.70 (m, 1H, H<sup>9a</sup>), 1.69-1.61 (m, 1H, H<sup>10</sup>), 1.58-1.50 (m, 2H, H<sup>15</sup>), 1.48-1.30 (m, 7H, H<sup>9b</sup> + H<sup>12</sup> + H<sup>13</sup> + H<sup>14</sup>), 1.16 (d,  $J = 7.0$  Hz, 3H, H<sup>B</sup>), 0.93 (d,  $J = 7.0$  Hz, 1.8H, H<sup>D</sup>), 0.92 (d,  $J = 7.0$  Hz, 1.2H, H<sup>D</sup>), 0.86 (d,  $J = 7.0$  Hz, 1.8H, H<sup>E</sup>), 0.85 (d,  $J = 7.0$  Hz, 1.2H, H<sup>E</sup>); <sup>13</sup>C-NMR (125 MHz, CDCl<sub>3</sub>)  $\delta = 214.3$  (C<sup>7min</sup>), 214.2 (C<sup>7maj</sup>), 162.1 (C<sup>1maj</sup>), 160.8 (C<sup>1min</sup>), 128.7 (C<sup>2maj</sup>), 124.7 (C<sup>2min</sup>), 113.1 (C<sup>3min</sup>), 111.3 (C<sup>3maj</sup>), 87.4 (C<sup>5min</sup>), 87.3 (C<sup>5maj</sup>), 85.2 (C<sup>11</sup>), 84.6 (C<sup>17</sup>), 68.1 (C<sup>18</sup>), 61.4 (C<sup>Cmin</sup>), 61.3 (C<sup>Cmaj</sup>), 57.8 (C<sup>F</sup>), 49.1 (C<sup>6min</sup>), 48.9 (C<sup>6maj</sup>), 42.3 (C<sup>8maj</sup>), 42.2 (C<sup>8min</sup>), 37.6 (C<sup>4min</sup>), 37.4 (C<sup>4maj</sup>), 34.77 (C<sup>10min</sup>), 34.75 (C<sup>10maj</sup>), 33.1 (C<sup>Amin</sup>), 30.24 (C<sup>12min</sup>), 30.20 (C<sup>12maj</sup>), 28.9 (C<sup>14</sup>), 28.4 (C<sup>15</sup>), 27.6 (C<sup>Amin</sup>), 26.0 (C<sup>9min</sup>), 25.9 (C<sup>9maj</sup>), 25.6 (C<sup>13</sup>), 19.4 (C<sup>Bmaj</sup>), 19.3 (C<sup>Bmin</sup>), 18.3 (C<sup>16</sup>), 14.7 (C<sup>Emaj</sup>), 14.6 (C<sup>Emin</sup>), 13.6 (C<sup>Dmin</sup>), 13.5 (C<sup>Dmaj</sup>); IR (neat):  $\tilde{\nu} = 3262, 2930, 1693, 1655, 1456, 1372, 1274, 1193, 1092, 1070, 969, 726, 686$  cm<sup>-1</sup>; MS (ES<sup>+</sup>)  $m/z$  (rel. intensity) 430 (100%, [M+Na]<sup>+</sup>); HRMS calcd for C<sub>24</sub>H<sub>41</sub>NO<sub>4</sub>Na 430.2933, found 430.2932; [ $\alpha$ ]<sub>D</sub><sup>20</sup> = -66.2 ( $c = 1.1$ , CHCl<sub>3</sub>).

<sup>10</sup> Two rotamers were observed at room temperature. In the description of the <sup>13</sup>C NMR spectrum, the signals specific to each rotamer are indicated with the terms maj and min for the major and minor rotamer, respectively.

## Preparation of compounds 8 and 9

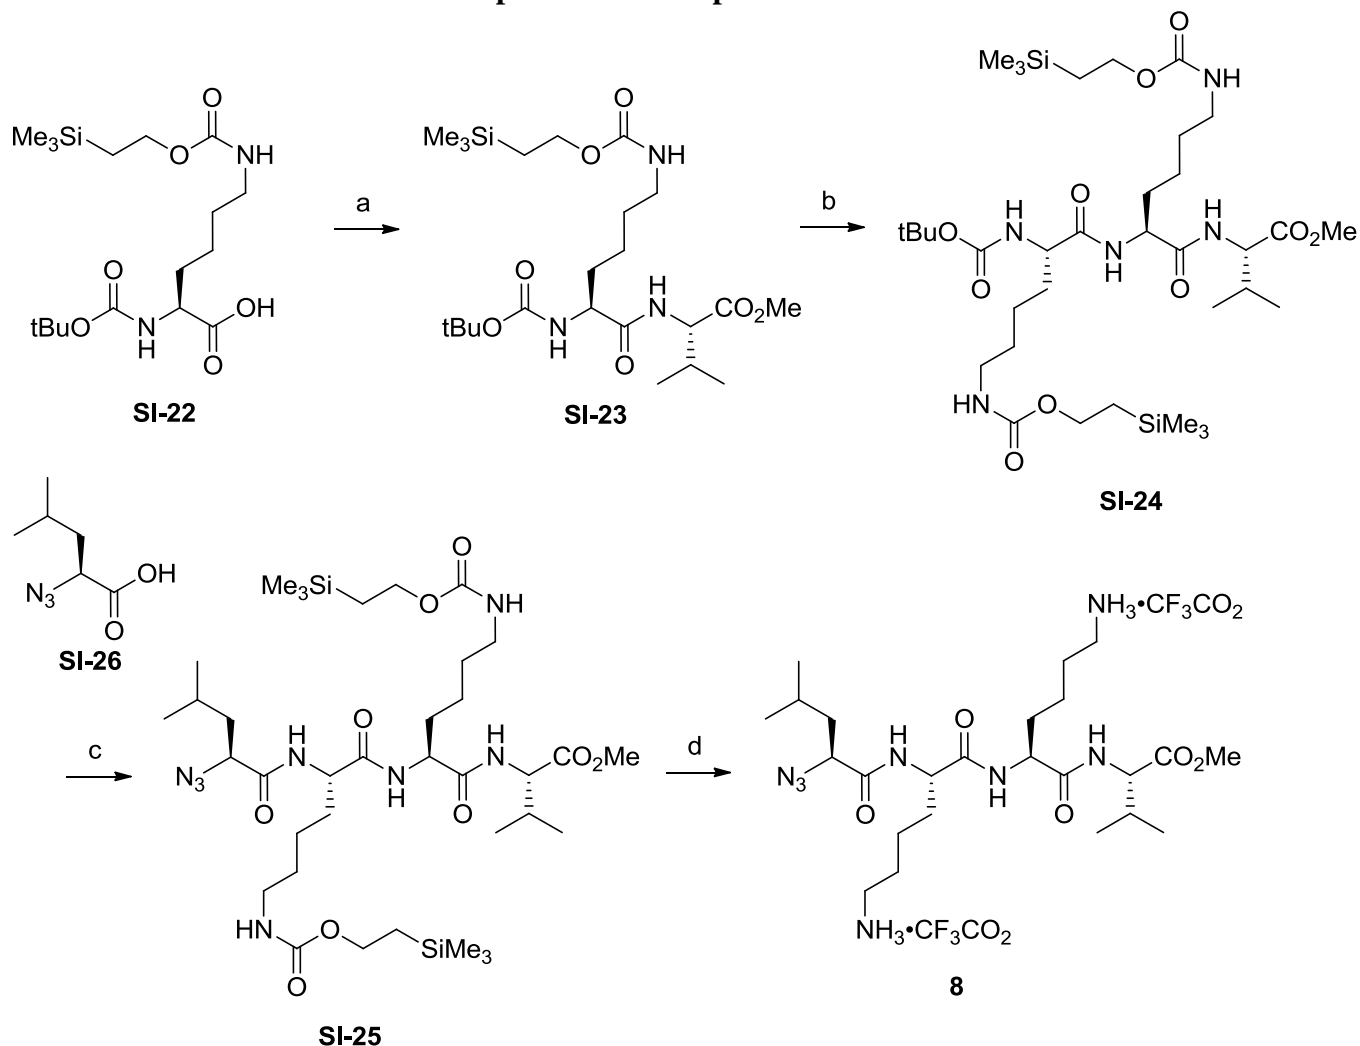

(a)  $\text{HCl}\cdot\text{H}_2\text{NValOMe}$ , hydroxybenzotriazole, 1-ethyl-3-(3-dimethylaminopropyl)carbodiimide hydrochloride,  $\text{Et}_3\text{N}$ ,  $\text{CH}_2\text{Cl}_2$ . (b) i) pTsOH,  $\text{Et}_2\text{O}$ ; ii) **SI-22**, hydroxybenzotriazole, 1-ethyl-3-(3-dimethylaminopropyl)carbodiimide hydrochloride,  $\text{Et}_3\text{N}$ ,  $\text{CH}_2\text{Cl}_2$ . (c) i) pTsOH,  $\text{Et}_2\text{O}$ ; ii) **SI-26**, hydroxybenzotriazole, 1-ethyl-3-(3-dimethylaminopropyl)carbodiimide hydrochloride,  $\text{Et}_3\text{N}$ ,  $\text{CH}_2\text{Cl}_2$ . (d)  $\text{CH}_2\text{Cl}_2$ , trifluoroacetic acid.

**Compound SI-23.** Compound **SI-22** was suspended in  $\text{CH}_2\text{Cl}_2$  (15 mL) with the hydrochloride salt of

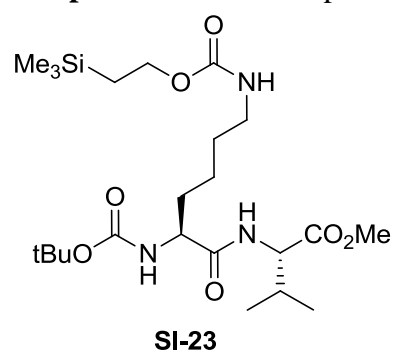

$\text{H}_2\text{NValOMe}$  (227 mg, 1.66 mmol), hydroxybenzotriazole (224 mg, 1.66 mmol) and 1-ethyl-3-(3-dimethylaminopropyl)carbodiimide hydrochloride (317 mg, 1.66 mmol), before adding  $\text{Et}_3\text{N}$  (0.42 mL, 3.02 mmol). The reaction mixture was stirred at room temperature for 16 hours. The reaction was diluted with  $\text{EtOAc}$  (50 mL), washed sequentially with citric acid (0.5M, 50 mL) and saturated aqueous  $\text{NaHCO}_3$  (50 mL). The organic phase was dried ( $\text{Na}_2\text{SO}_4$ ) and the solvent removed under reduced pressure to give the title compound as a colourless oil (737 mg, 1.47 mmol, 97%), which was used without further purification in the following step.  $^1\text{H-NMR}$  (500 MHz,  $\text{CDCl}_3$ )  $\delta$

6.67-6.49 (m, 1H(NH)), 5.17-4.94 (m, 1H(NH)), 4.82-4.66 (m, 1H(NH)), 4.52 (dd,  $J = 8.8$  and  $4.9$  Hz, 1H), 4.19-4.03 (m, 3H), 3.73 (s, 3H), 3.21-3.07 (m, 2H), 2.22-2.12 (m, 1H), 1.88-1.71 (m, 1H), 1.67-1.57 (m, 1H), 1.56-1.47 (m, 2H), 1.44 (s, 9H), 1.43-1.33 (m, 2H), 1.01-0.91 (m, 2H), 0.92 (d,  $J = 6.7$  Hz, 3H), 0.89 (d,  $J = 6.9$  Hz, 3H), 0.02 (s, 9H); IR (neat):  $\tilde{\nu} = 3320$  (br), 2954, 1742, 1691, 1662, 1521, 1456, 1438, 1392, 1366, 1337, 1248, 1212, 1171, 1045, 1022, 937, 859, 837, 778, 733, 694  $\text{cm}^{-1}$ ; MS ( $\text{ES}^+$ )  $m/z$  (rel. intensity) 526 (100 %,  $[\text{M}+\text{Na}]^+$ ); HRMS calcd for  $\text{C}_{23}\text{H}_{45}\text{N}_3\text{O}_7\text{SiNa}$  526.2924, found 526.2924.

**Compound SI-24.** *p*-toluenesulfonic acid (293 g, 1.54 mmol) was added to a solution of **SI-23** (706 mg, 1.40 mmol) in Et<sub>2</sub>O (50 mL). The reaction was held at 30 °C for 30 minutes. The solvent was removed under reduced pressure at 30 °C and held at this temperature under vacuum for 1 hour. The crude product was kept under high vacuum for 16 hours to give a glass residue (MS (ES<sup>+</sup>) *m/z* (rel. intensity) 404 (100 %, [M+H]<sup>+</sup>), 426 (50 %, [M+Na]<sup>+</sup>); HRMS calcd for C<sub>18</sub>H<sub>38</sub>N<sub>3</sub>O<sub>5</sub>Si 404.2581, found 404.2578) which was suspended in CH<sub>2</sub>Cl<sub>2</sub> (14 mL) with **SI-22** (491 mg, 1.26 mmol), hydroxybenzotriazole (207 mg, 1.54 mmol) and 1-ethyl-3-(3-dimethylaminopropyl)carbodiimide hydrochloride (294 mg, 1.54 mmol) before adding Et<sub>3</sub>N (0.39 mL, 2.8 mmol). The same procedure as described for the preparation of **SI-23** was then applied to give crude **SI-24** as a colourless oil (926 mg, 85%), which was used without further purification in the following step.

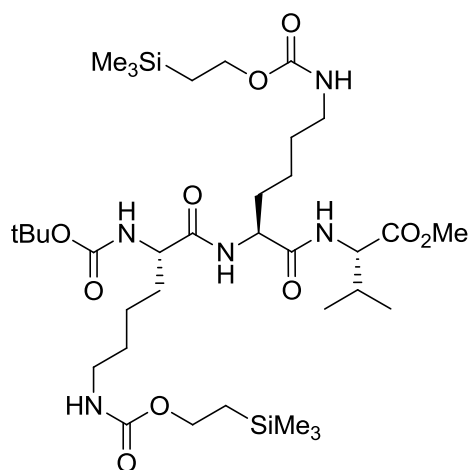

**SI-24**

<sup>1</sup>H-NMR (500 MHz, CDCl<sub>3</sub>) δ 4.52 (dd, *J* = 8.8 and 4.9 Hz, 1H), 4.46-4.38 (m, 1H), 4.22-4.03 (m, 5H), 3.73 (s, 3H), 3.24-3.03 (m, 4H), 2.22-2.12 (m, 1H), 1.92-1.73 (m, 2H), 1.73-1.58 (m, 2H), 1.58-1.46 (m, 4H), 1.43 (s, 9H), 1.42-1.31 (m, 4H), 1.05-0.90 (m, 4H), 0.91 (d, *J* = 6.7 Hz, 3H), 0.89 (d, *J* = 6.9 Hz, 3H), 0.03 (s, 18H);<sup>11</sup> IR (neat):  $\tilde{\nu}$  = 3311 (br), 2953, 1693, 1648, 1524, 1457, 1438, 1392, 1366, 1337, 1249, 1172, 1059, 912, 859, 836, 778, 731, 694 cm<sup>-1</sup>; MS (ES<sup>+</sup>) *m/z* (rel. intensity) 798 (100 %, [M+Na]<sup>+</sup>); HRMS calcd for C<sub>35</sub>H<sub>69</sub>N<sub>5</sub>O<sub>10</sub>Si<sub>2</sub>Na 798.4481, found 798.4501.

**Compound 8.** *p*-toluenesulfonic acid (224 mg, 1.28 mmol) was added to a solution of **SI-24** (914 mg, 1.17 mmol) in Et<sub>2</sub>O (40 mL). The reaction was held at 30 °C for 30 minutes. The solvent was removed under reduced pressure at 30 °C and held at this temperature under vacuum for 1 hour. The crude product was kept under high vacuum for 16 hours to give a glass residue (MS (ES<sup>+</sup>) *m/z* (rel. intensity) 698 (100 %, [M+Na]<sup>+</sup>); HRMS calcd for C<sub>30</sub>H<sub>61</sub>N<sub>5</sub>O<sub>8</sub>Si<sub>2</sub>Na 698.3964, found 698.3956) which was suspended in CH<sub>2</sub>Cl<sub>2</sub> (12 mL) with **SI-26**<sup>12</sup> (239 mg, 1.52 mmol), hydroxybenzotriazole (197 mg, 1.29 mmol) and 1-ethyl-3-(3-dimethylaminopropyl)carbodiimide hydrochloride (244 mg, 1.29 mmol), before adding Et<sub>3</sub>N (0.30 mL, 2.34 mmol). The reaction mixture was stirred at room temperature for 16 hours. The reaction was diluted with EtOAc (40 mL), washed sequentially with citric acid (0.5M, 40 mL) and saturated aqueous NaHCO<sub>3</sub> (40 mL). The organic phase was dried (Na<sub>2</sub>SO<sub>4</sub>) and the solvent removed under reduced pressure to give **SI-25** as a colourless oil (MS (ES<sup>+</sup>) *m/z* (rel. intensity) 837 (100 %, [M+Na]<sup>+</sup>); HRMS calcd for C<sub>36</sub>H<sub>70</sub>N<sub>8</sub>O<sub>9</sub>Si<sub>2</sub>Na 837.4702, found 837.4711). This crude material was then diluted in CH<sub>2</sub>Cl<sub>2</sub>/TFA (18 mL, 4:1, 0.1M) at 0 °C. After stirring at room temperature for 2 hours, the solvent was removed under reduced pressure. Purification by flash chromatography on deactivated silica gel<sup>13</sup> (CH<sub>2</sub>Cl<sub>2</sub> then CH<sub>2</sub>Cl<sub>2</sub>/MeOH, 9:1) afforded **8** as a pale orange glass residue (441 mg, 50%). <sup>1</sup>H-NMR (500 MHz, CD<sub>3</sub>OD) δ 4.45-4.39 (m, 1H), 4.35-4.27 (m, 2H), 3.85 (dd, *J* = 8.5 and 6.0 Hz, 1H), 3.71 (s, 3H), 3.01-2.90 (m, 4H), 2.18-2.11 (m,

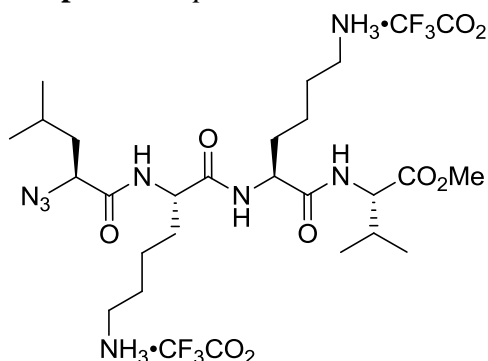

**8**

4.45-4.39 (m, 1H), 4.35-4.27 (m, 2H), 3.85 (dd, *J* = 8.5 and 6.0 Hz, 1H), 3.71 (s, 3H), 3.01-2.90 (m, 4H), 2.18-2.11 (m,

<sup>11</sup> Not all the rapidly exchangeable protons are visible in CDCl<sub>3</sub>. However, several poorly resolved signals were visible between 6.89 and 4.83 ppm: 6.89-4.83 (m, 0.7H), 6.73-6.60 (m, 0.7H), 5.30-5.18 (m, 0.8H), 5.08-4.85 (m, 1.7H).

<sup>12</sup> J. T. Lundquist IV and J. C. Pelletier, *Org. Lett.*, 2001, **3**, 781

<sup>13</sup> The silica was treated with EtSiCl<sub>3</sub> prior to the chromatography. See: P. Panne and M. J. Fox, *J. Am. Chem. Soc.*, 2007, **129**,







## Preparation of compounds 10 and 11

**Compound 10.**<sup>16</sup> Compound **7c** (7.4 mg, 0.017 mmol), **8** (12.8 mg, 0.017 mmol), CuSO<sub>4</sub> (0.017 mL, 0.1M in water, 10 mol%) and sodium-L-ascorbate (0.6 mg, 0.0034 mmol, 40 mol%) were stirred in *t*BuOH (0.17 mL, 0.1M) for 48 hours at 35 °C. The reaction mixture was diluted with ethanol and filtered through a short pad of celite. The solvent was removed under reduced pressure and the crude residue purified by flash column chromatography on silylated silica gel<sup>12</sup> (EtOAc/EtOH, 20:1 to 1:1) to give **10** as a gum (8.0 mg, 39%, d.r. =

87:13). <sup>1</sup>H-NMR (500 MHz, CD<sub>3</sub>OD) δ 8.32 (s, 0.65H, H<sup>1</sup>), 8.06 (s, 0.35H, H<sup>1</sup>), 7.93-7.85 (m, 1H, H<sup>20</sup>), 7.10 (d, *J* = 14.8 Hz, 0.35H, H<sup>2</sup>), 6.71 (d, *J* = 14.2 Hz, 0.65H, H<sup>2</sup>), 5.50-5.40 (m, 1H, H<sup>G</sup>), 5.26 (dd, *J* = 14.7 and 9.4 Hz, 0.35H, H<sup>3</sup>), 5.19 (dd, *J* = 14.1 and 9.2 Hz, 0.65H, H<sup>3</sup>), 4.43 (dd, *J* = 8.8 and 5.6 Hz, 1H, H<sup>I</sup>/H<sup>K</sup>), 4.36-4.27 (m, 2H, H<sup>M</sup> + H<sup>I</sup>/H<sup>K</sup>), 3.72 (s, 3H, H<sup>O</sup>), 3.36 (s, 6H, H<sup>C</sup> + H<sup>F</sup>), 3.11 (s, 1.05H, H<sup>A</sup>), 3.06-2.99 (m, 1H, H<sup>5</sup>), 3.03 (s, 1.95H<sup>A</sup>), 2.98-2.93 (m, 2H, H<sup>W</sup>/H<sup>W'</sup>), 2.92-2.87 (m, 2H, H<sup>W</sup>/H<sup>W'</sup>), 2.80-2.74 (m, 1H, H<sup>6</sup>), 2.74-2.66 (m, 2H, H<sup>18</sup>), 2.59-2.53 (m, 2H, H<sup>8</sup>), 2.51-2.43 (m, 1H, H<sup>4</sup>), 2.20-2.12 (m, 1H, H<sup>X</sup>), 2.12-2.02 (m, 1H, H<sup>P</sup>), 2.02-1.94 (m, 1H, H<sup>P</sup>), 1.89-1.78 (m, 2H, H<sup>Tα</sup> + H<sup>Tα'</sup>), 1.77-1.57 (m, 10H, H<sup>9α</sup> + H<sup>10</sup> + H<sup>17</sup> + H<sup>V</sup> + H<sup>V'</sup> + H<sup>Tβ</sup> + H<sup>Tβ'</sup>), 1.55-1.25 (m, 19H, H<sup>9β</sup> + H<sup>12</sup> + H<sup>13</sup> + H<sup>14</sup> + H<sup>15</sup> + H<sup>16</sup> + H<sup>Q</sup> + H<sup>U</sup> + H<sup>U'</sup>), 1.17 (d, *J* = 7.0 Hz, 3H, H<sup>B</sup>), 1.01-0.88 (m, 15H, H<sup>D</sup> + H<sup>R</sup> + H<sup>S</sup> + H<sup>Y</sup> + H<sup>Z</sup>), 0.85 (d, *J* = 6.8 Hz, 3H, H<sup>E</sup>); MS (ES<sup>+</sup>) *m/z* (rel. intensity) 962 (100 %, [M+H]<sup>+</sup>); IR (neat):  $\tilde{\nu}$  = 3306 (br), 3068, 2934, 2870, 1740, 1652, 1547, 1459, 1438, 1373, 1275, 1202, 1180, 1136, 1094, 972, 835, 799, 722 cm<sup>-1</sup>; HRMS calcd for C<sub>50</sub>H<sub>92</sub>N<sub>9</sub>O<sub>9</sub> 962.7018, found 962.7047.

<sup>16</sup> Two rotamers were visible in the <sup>1</sup>H NMR spectrum. The signal for H<sup>11</sup> is masked by CD<sub>3</sub>OD. The rapidly exchangeable protons were mostly invisible in CD<sub>3</sub>OD and are therefore not listed in the description.

**Compound 11.**<sup>15</sup> This compound was obtained from **7c** (5.0 mg, 0.011 mmol) and **9** (6.7 mg, 0.011 mmol) using the same procedure as described for the preparation of **10**. Gum (7.1 mg, 63%, d.r. = 87:13).

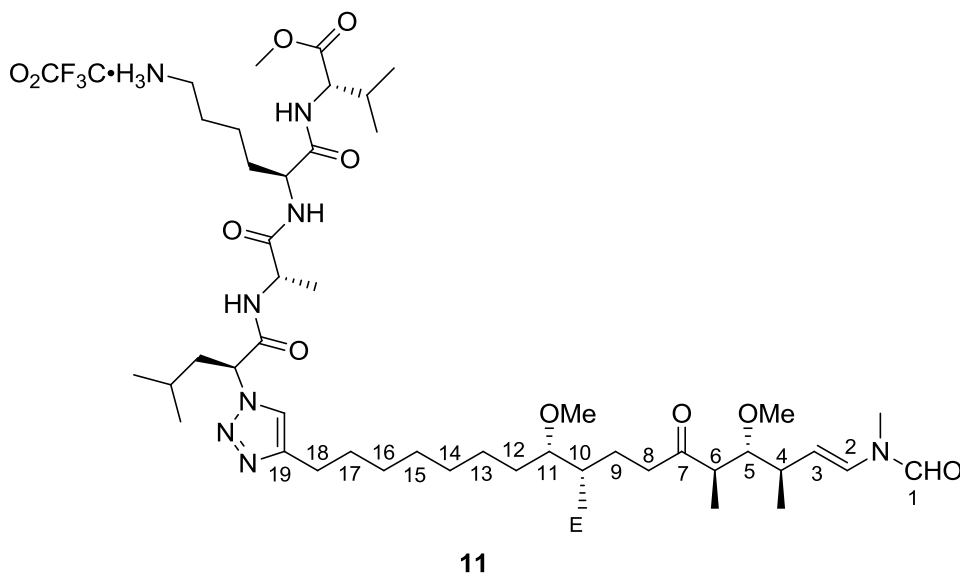

(7.1 mg, 63%, d.r. = 87:13). <sup>1</sup>H-NMR (500 MHz, CD<sub>3</sub>OD) δ 8.32 (s, 0.65H, H<sup>1</sup>), 8.09 (s, 0.35H, H<sup>1</sup>), 7.90-7.82 (m, 1H, H<sup>20</sup>), 7.10 (d, *J* = 14.6 Hz, 0.35H, H<sup>2</sup>), 6.70 (d, *J* = 14.2 Hz, 0.65H, H<sup>2</sup>), 5.45-5.38 (m, 1H, H<sup>G</sup>), 5.26 (dd, *J* = 14.6 and 9.0 Hz, 0.35H, H<sup>3</sup>), 5.19 (dd, *J* = 14.2 and 9.3 Hz, 0.65H, H<sup>3</sup>), 4.44 (dd, *J* = 8.4 and 5.4 Hz, 1H, H<sup>K</sup>), 4.32 (d, *J* = 7.0 Hz, 1H,

H<sup>M</sup>), 4.26 (q, *J* = 6.9 Hz, H<sup>1</sup>), 3.72 (s, 3H, H<sup>O</sup>), 3.36 (s, 6H, H<sup>C</sup> + H<sup>F</sup>), 3.11 (s, 1.05H, H<sup>A</sup>), 3.06-2.99 (m, 1H, H<sup>5</sup>), 3.03 (s, 1.95H<sup>A</sup>), 2.98-2.93 (m, 2H, H<sup>W</sup>), 2.80-2.74 (m, 1H, H<sup>6</sup>), 2.74-2.66 (m, 2H, H<sup>18</sup>), 2.58-2.52 (m, 2H, H<sup>8</sup>), 2.51-2.42 (m, 1H, H<sup>4</sup>), 2.20-2.12 (m, 1H, H<sup>X</sup>), 2.12-2.02 (m, 1H, H<sup>P</sup>), 2.02-1.94 (m, 1H, H<sup>P</sup>), 1.89-1.78 (m, 1H, H<sup>Tα</sup>), 1.76-1.62 (m, 7H, H<sup>9α</sup> + H<sup>10</sup> + H<sup>17</sup> + H<sup>V</sup> + H<sup>Tβ</sup>), 1.55-1.25 (m, 18H, H<sup>9β</sup> + H<sup>12</sup> + H<sup>13</sup> + H<sup>14</sup> + H<sup>15</sup> + H<sup>16</sup> + H<sup>Q</sup> + H<sup>U</sup> + H<sup>Z</sup>), 1.17 (d, *J* = 7.0 Hz, 3H, H<sup>B</sup>), 1.01-0.88 (m, 15H, H<sup>D</sup> + H<sup>R</sup> + H<sup>S</sup> + H<sup>Y</sup> + H<sup>Z</sup>), 0.85 (d, *J* = 6.8 Hz, 3H, H<sup>E</sup>); IR (neat):  $\tilde{\nu}$  = 3306 (br), 3302 (br), 2930, 2414, 1793, 1740, 1651, 1547, 1457, 1371, 1272, 1202, 1148, 1092, 723 cm<sup>-1</sup>; MS (ES<sup>+</sup>) *m/z* (rel. intensity) 905 (100 %, [M+H]<sup>+</sup>); HRMS calcd for C<sub>47</sub>H<sub>85</sub>N<sub>8</sub>O<sub>9</sub> 905.6440, found 905.6470.

### Bioassays conducted on 7a–7c, 10 and 11

Rabbit muscle actin was prepared as described in Winder and Walsh 1990.<sup>17</sup> For G-actin interaction assays, actin was labelled with acrylodan according to a previously published method.<sup>18</sup> Compounds were incubated with 2 $\mu$ M prodan-actin and following excitation at 380nm any interaction was monitored by scanning the emission between 400 and 650nm using a Varian Cary Eclipse fluorescence spectrophotometer.

The effect of compounds on 6 $\mu$ M F-actin in vitro was determined following a high speed centrifugation pelleting assay and SDS-PAGE analysis of resultant supernatant (G-actin) and pellet (F-actin) fractions as described previously. SDS-gels were scanned with a Biorad ChemiDoc XRS+ and quantified with Image Lab software using volume integration and local background subtraction.<sup>19</sup> Representative results are depicted in Figure S1.

Actin polymerisation assays were conducted with varying concentrations of compounds using 5 $\mu$ M pyrenyl G-actin in a Varian fluorescence spectrophotometer according to previously described procedures.<sup>20</sup> Representative results are depicted in Figure S2.

REF52 rat embryo fibroblasts were grown in DMEM with 10% FCS as described previously.<sup>21</sup> Cells were seeded in flat bottomed 96 well tissue culture plates and incubated with various concentrations of the compounds for either 2 or 24 hours. Following incubation, cells were fixed with 3.7% formaldehyde in PBS (10 min) permeabilised in 0.1% Triton X-100 in PBS (1 min) and incubated with 1 $\mu$ g/ml rhodamine phalloidin for one hour. Following 3 washes in PBS cells were mounted directly in the 96 well plate by addition of 20 $\mu$ l of Hydromount containing DAPI. Cells were visualised on a Leica DMIRE2 microscope and images captured using Leica Q-fluoro software.

---

<sup>17</sup> S. J. Winder and M. P. Walsh, *J Biol Chem.*, 1990, **265**, 10148.

<sup>18</sup> G. Marriott, K. Zechel K and T. M. Jovin, *Biochem.*, 1988, **27**, 6214.

<sup>19</sup> S. J. Winder, L. Hemmings, S. K. Maciver, S. J. Bolton, J. M. Tinsley, K. E. Davies, D. R. Critchley and J. Kenderick-Jones, *J Cell Sci.*, 1995, **108**, 63.

<sup>20</sup> M. Pfuhl, S. J. Winder and A. Pastore, *EMBO J.*, 1994, **13**, 1782.

<sup>21</sup> Y.-J. Chen, H. J. Spence, J. M. Cameron, T. Jess, J. L. Ilsley and S. J. Winder, *Biochem J.*, 2003, **375**, 329.

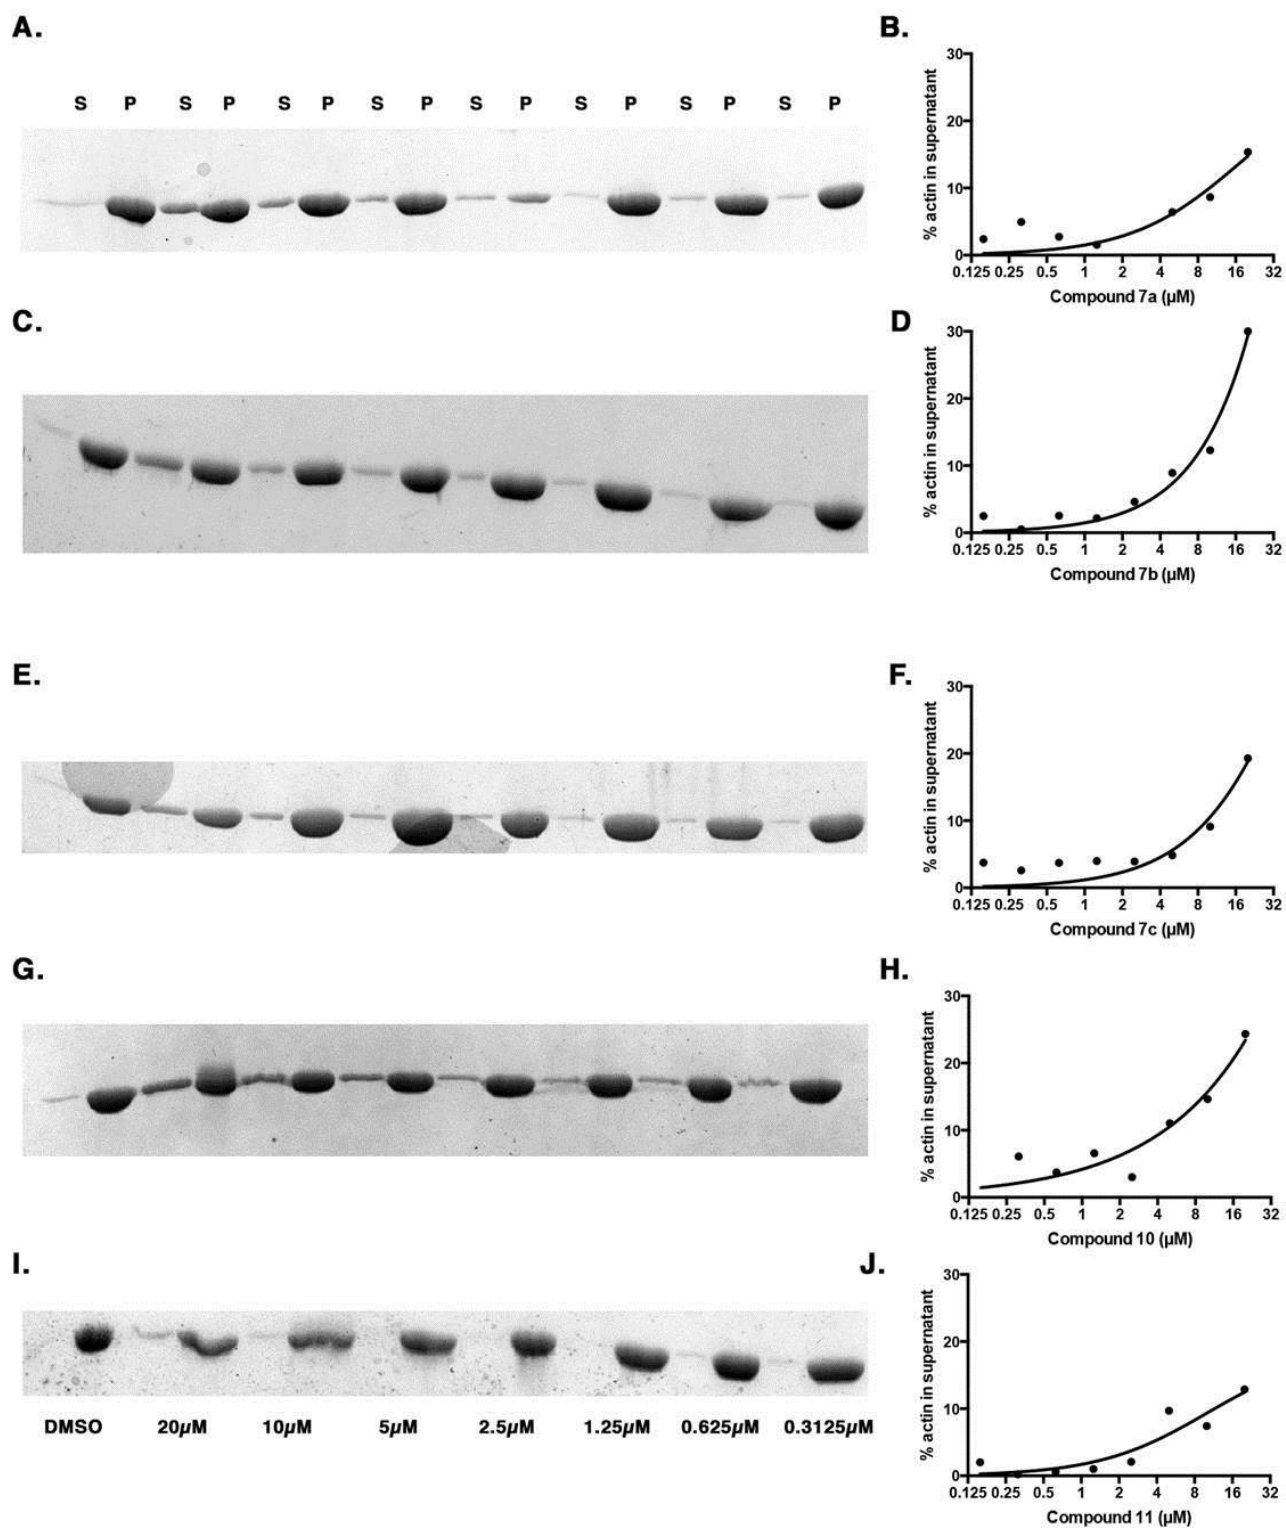

**Figure S1.** Coomassie blue stained SDS gel of equivalent volumes of supernatant (S) and pellet (P) fractions following incubation of 6 $\mu\text{M}$  F-actin with the indicated concentrations of compounds and separation by high speed centrifugation {7a (A), 7b (C), 7c (E), 10 (G) and 11 (I)}. At higher concentrations of 10, there is a clear shift of actin from pellet to supernatant fraction indicative of depolymerisation of F-actin. Quantification of the amount of actin in the supernatant was performed for 7a-c, 10, 11 and DMSO control. In the presence of DMSO only, between 1 and 2% of actin in is the supernatant fraction. A compound was deemed to have a significant effect at a concentration that resulted in 5% of actin in the supernatant fraction. Quantification of the gels in A, C, E, G and I is shown in B, D, F, H and J, respectively.

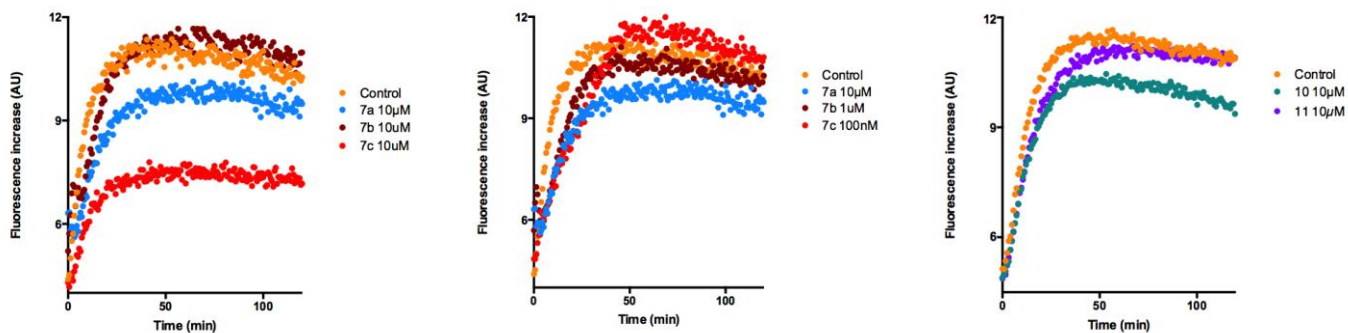

**Figure S2.** Effect of compounds **7a-c**, **10** and **11** on the polymerisation rate of 2 $\mu$ M pyrenyl actin as monitored by the increase in pyrenyl fluorescence at 384nm on polymerisation. Reactions were monitored for 120 minutes and recorded as arbitrary fluorescence units. The initial rate of polymerisation is the most reliable parameter to determine an effect of a compound on simple actin polymerisation. Rates were calculated for compounds in the initial linear phase of polymerisation up to 20 minutes. The minimum concentration that reduced the polymerisation rate by 10% compared to DMSO control was deemed significant and is indicated in Table 1 of the manuscript.

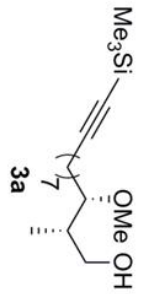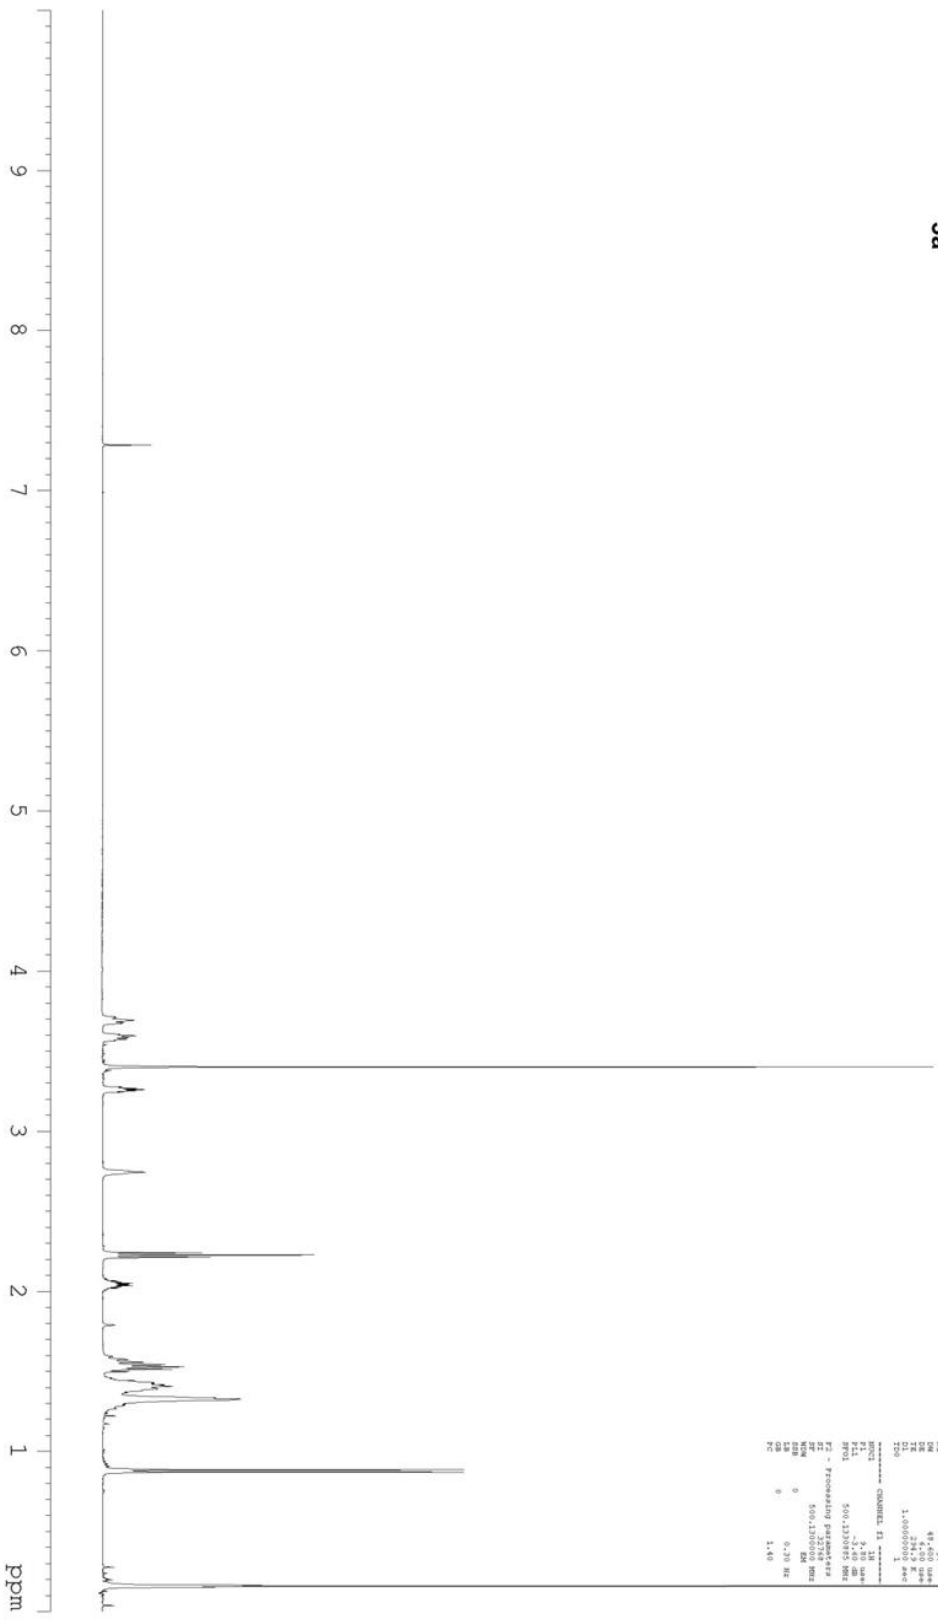

```

Current Data Parameters
NAME      D17-02-21-01
PROCNO    1
F2 - Acquisition Parameters
Time      20:05:43
Date_     02/21/17
PROBHD    5 mm PABBO 5H-1
PULPROG   zgpg30
TD         65536
SOLVENT    CDCl3
NS         1
DS         4
SWH        10218.402 MHz
FIDRES     0.121693 MHz
AQ         3.114668000 sec
RG         481.57 um
DE         4.00 um
TE         300.2 K
DIL        1.000000000
===== CHANNEL f1 =====
NUC1       13C
P1         2.00 usec
PL1        0 dB
PRF1       500.1250000 MHz
F2 - Processing parameters
SI         32768
SF         500.1250000 MHz
WDW        EM
SSB        0
LB         0.30 Hz
GB         0
PC         1.00
  
```



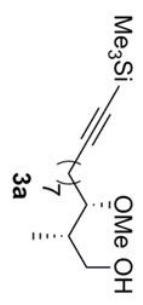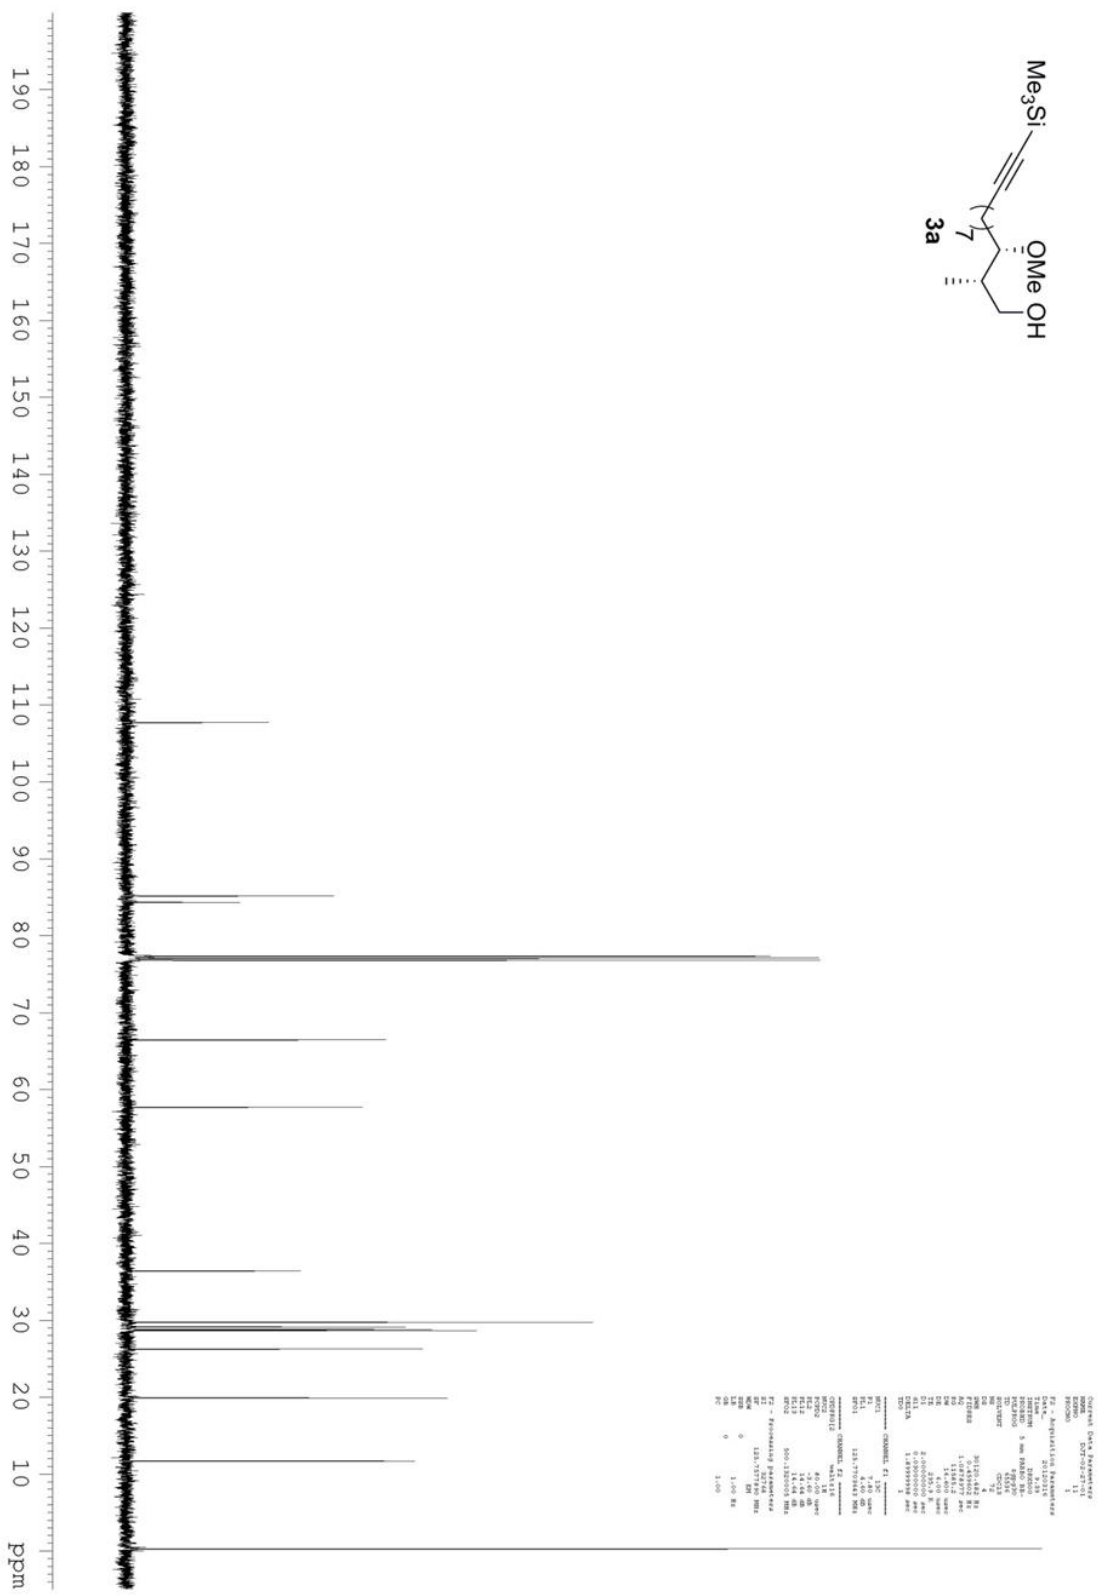

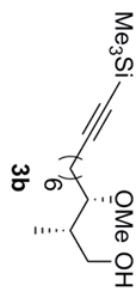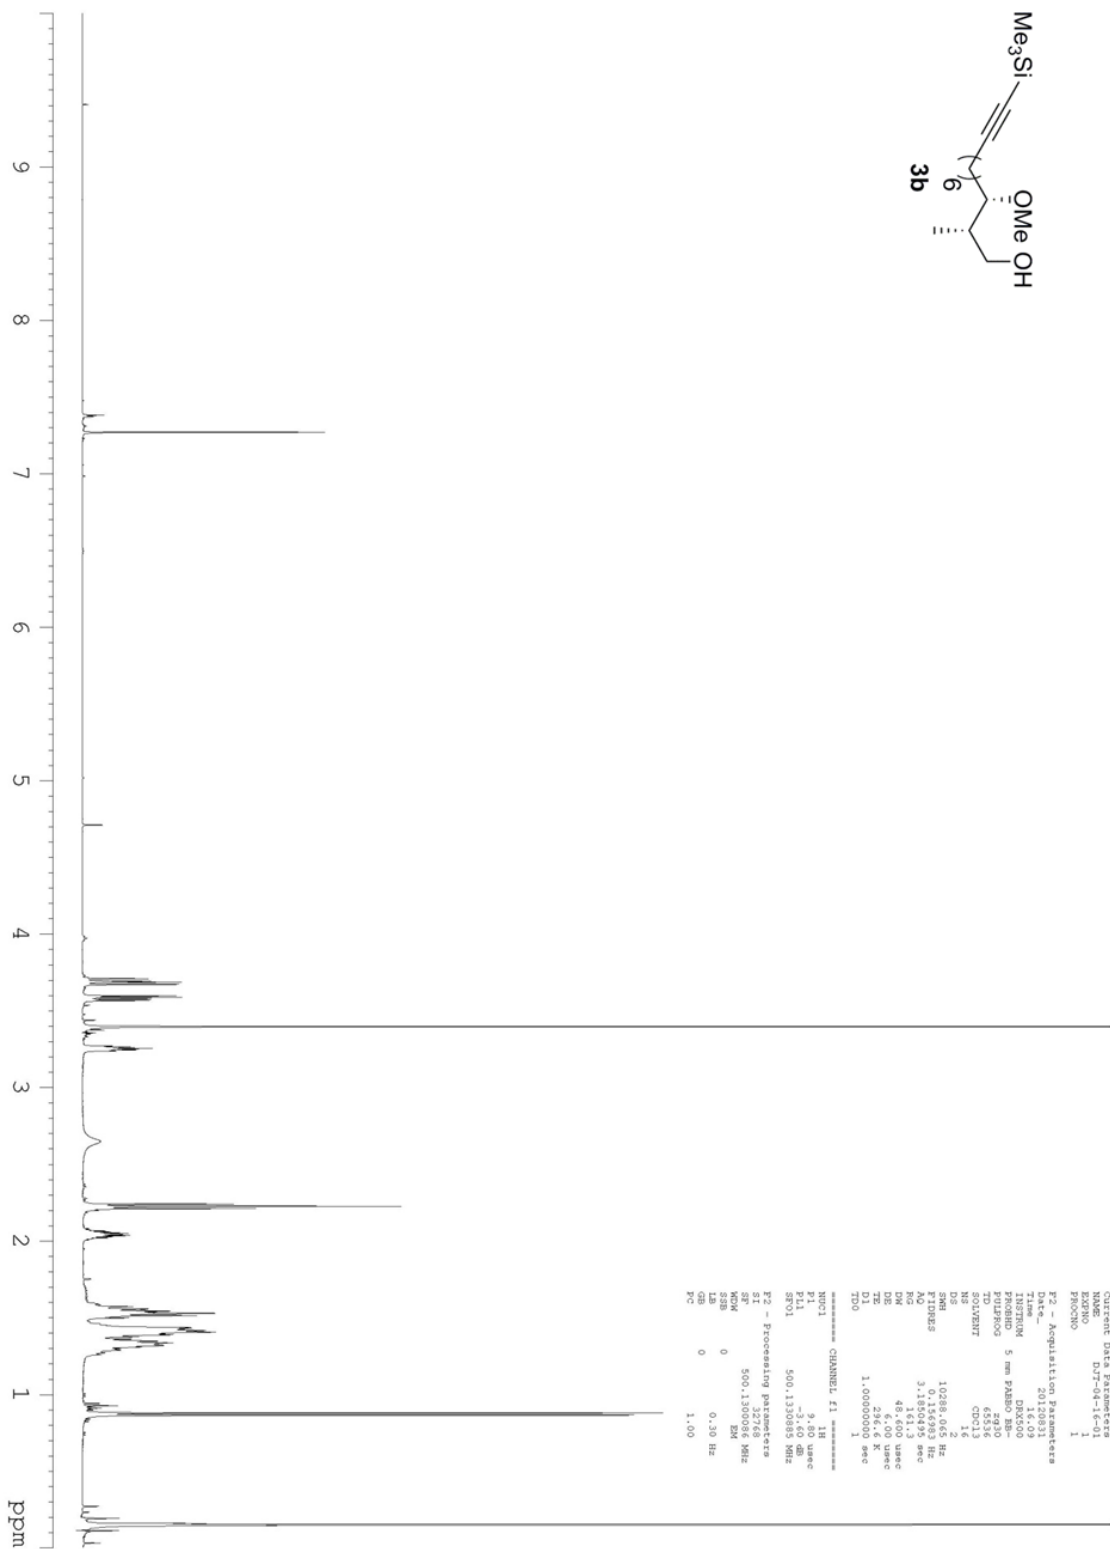

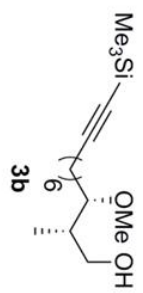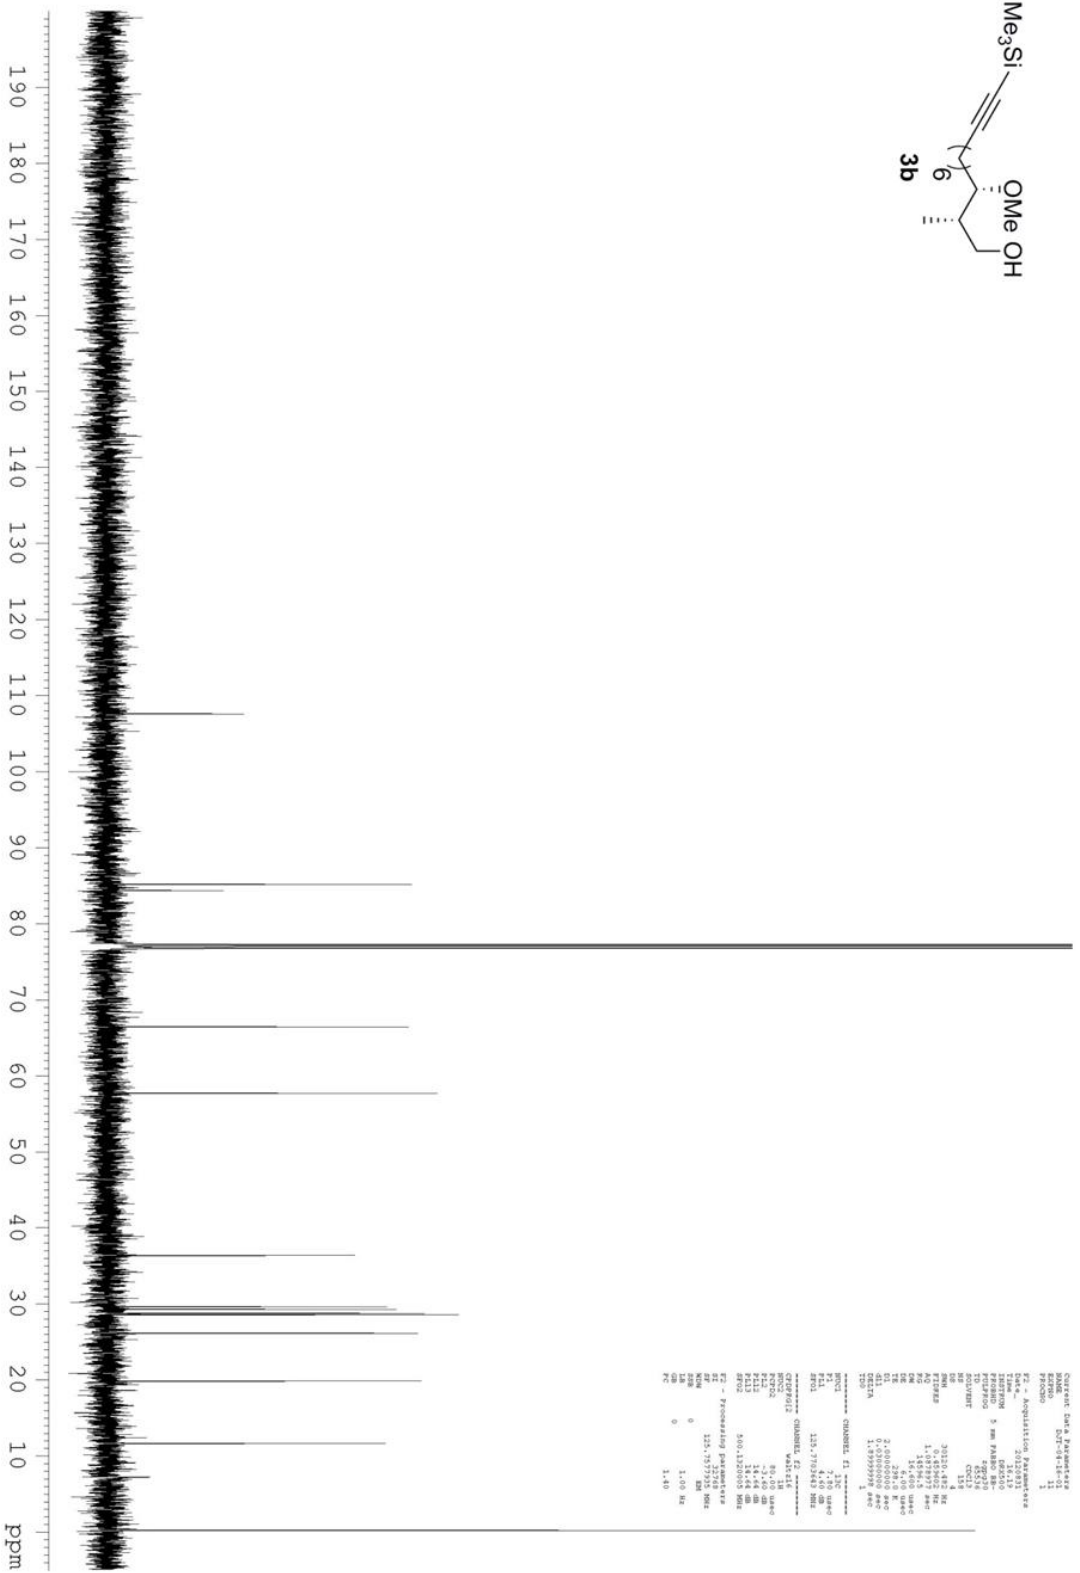

```

Current Date Parameters
=====
Date_   20120801
Time    11:41:11
INSTRUM spect
PROBHD  5 mm BBO
PULPROG zgpg30
SOLVENT CDCl3
NS      2023
DS      4
SWH      12139.438 Hz
FIDRES  0.4200000 Hz
AQ      1.4549615 sec
RG      655
DE      4.000 usec
TE      300.2 K
DILUTION 1.0000000 sec
===== CHANNEL f1 =====
NUC1     13C
P1      7.00 usec
PL1     0.00 dB
FREQ1   125.7628443 MHz
===== CHANNEL f2 =====
NUC2     1H
P2      13.00 usec
PL2     19.00 dB
FREQ2   500.1360500 MHz
=====
PC      0
=====
  
```

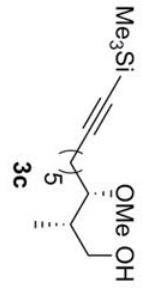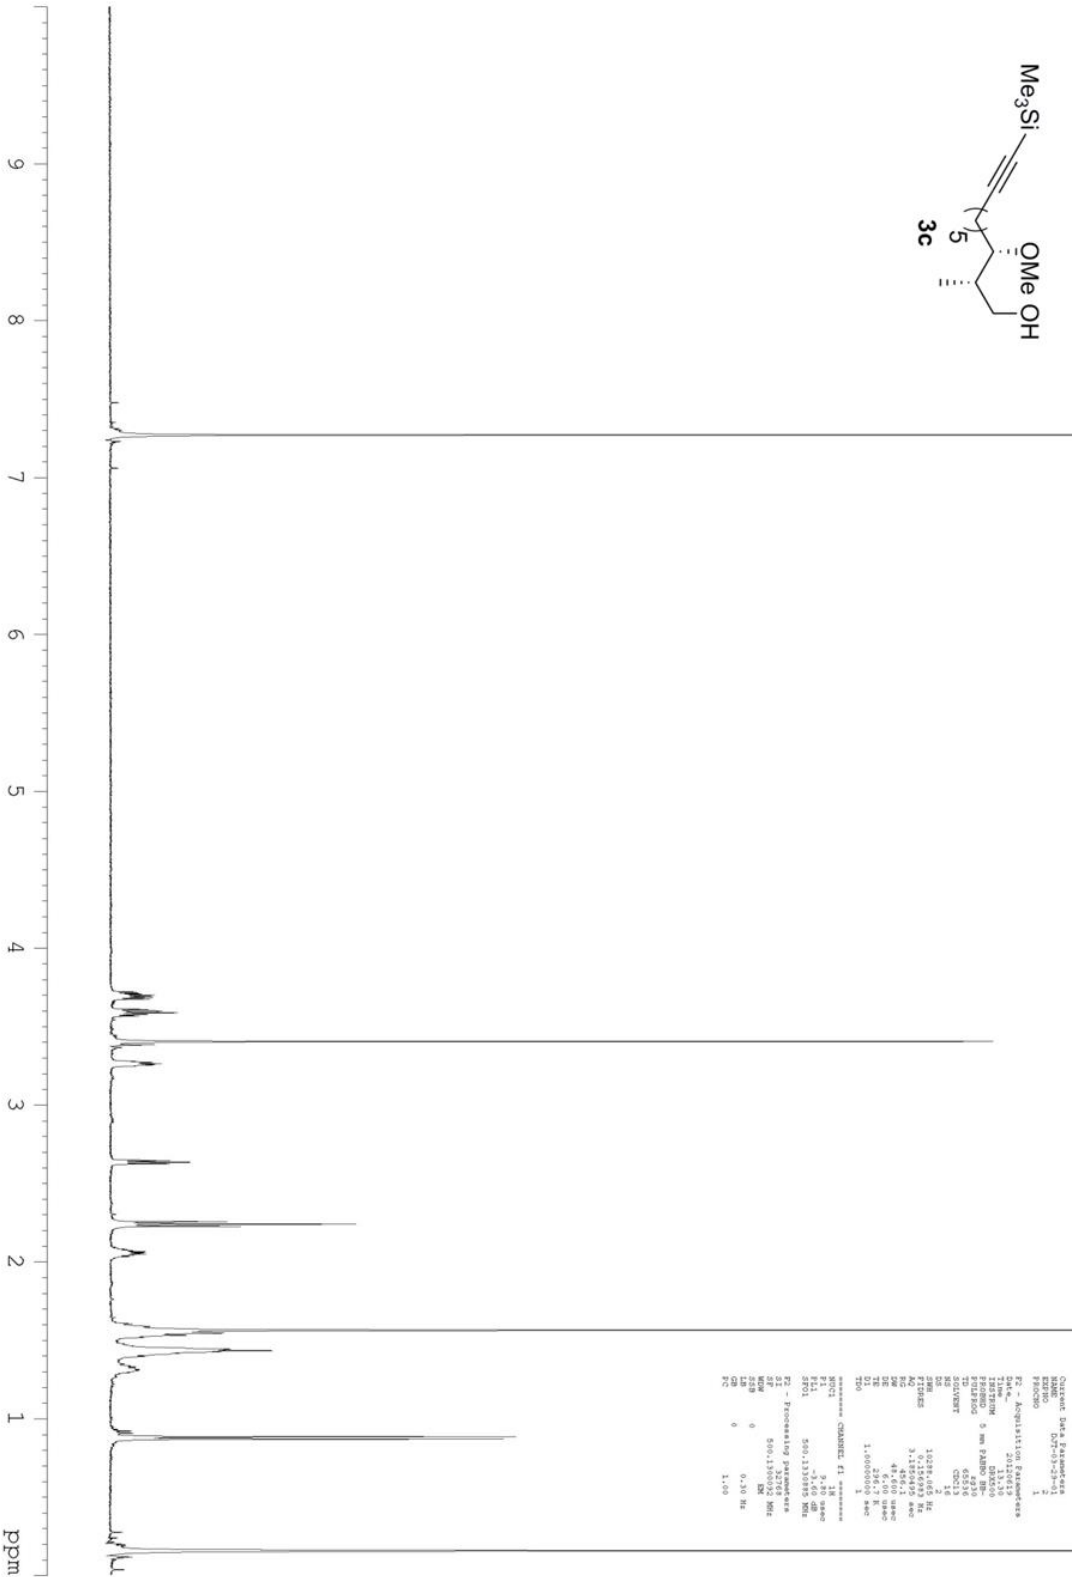

Output Data Parameters  
 EXPNO 1  
 PROCNO 1  
 F2 - Acquisition Parameters  
 Date\_ 20110301  
 Time 13:30  
 Name 3c  
 PULPROG zgpg30  
 PRGNAME 5 nm BIRD90  
 EDITOR 6230  
 SOLVENT CDCl<sub>3</sub>  
 NS 1024  
 DS 2  
 SWH 10278.400 Hz  
 FIDRES 0.1256693 Hz  
 AQ 48.61600000 sec  
 RG 312.8564750000000  
 DQ 396.7 Hz  
 TE 300.2 K  
 DE 1.0000000000000001  
 TD 1  
 ===== CHANNEL f1 =====  
 P1 9.40000000  
 PL 0.00000000  
 F1 500.1370000000000  
 SFO 500.1370000000000  
 F2 - Processing parameters  
 SI 32768  
 SF 500.1370000000000  
 MD 32  
 EQ 0  
 F2 0.250 Hz  
 SFO 0 1.000

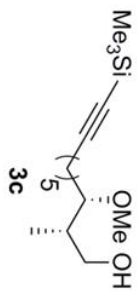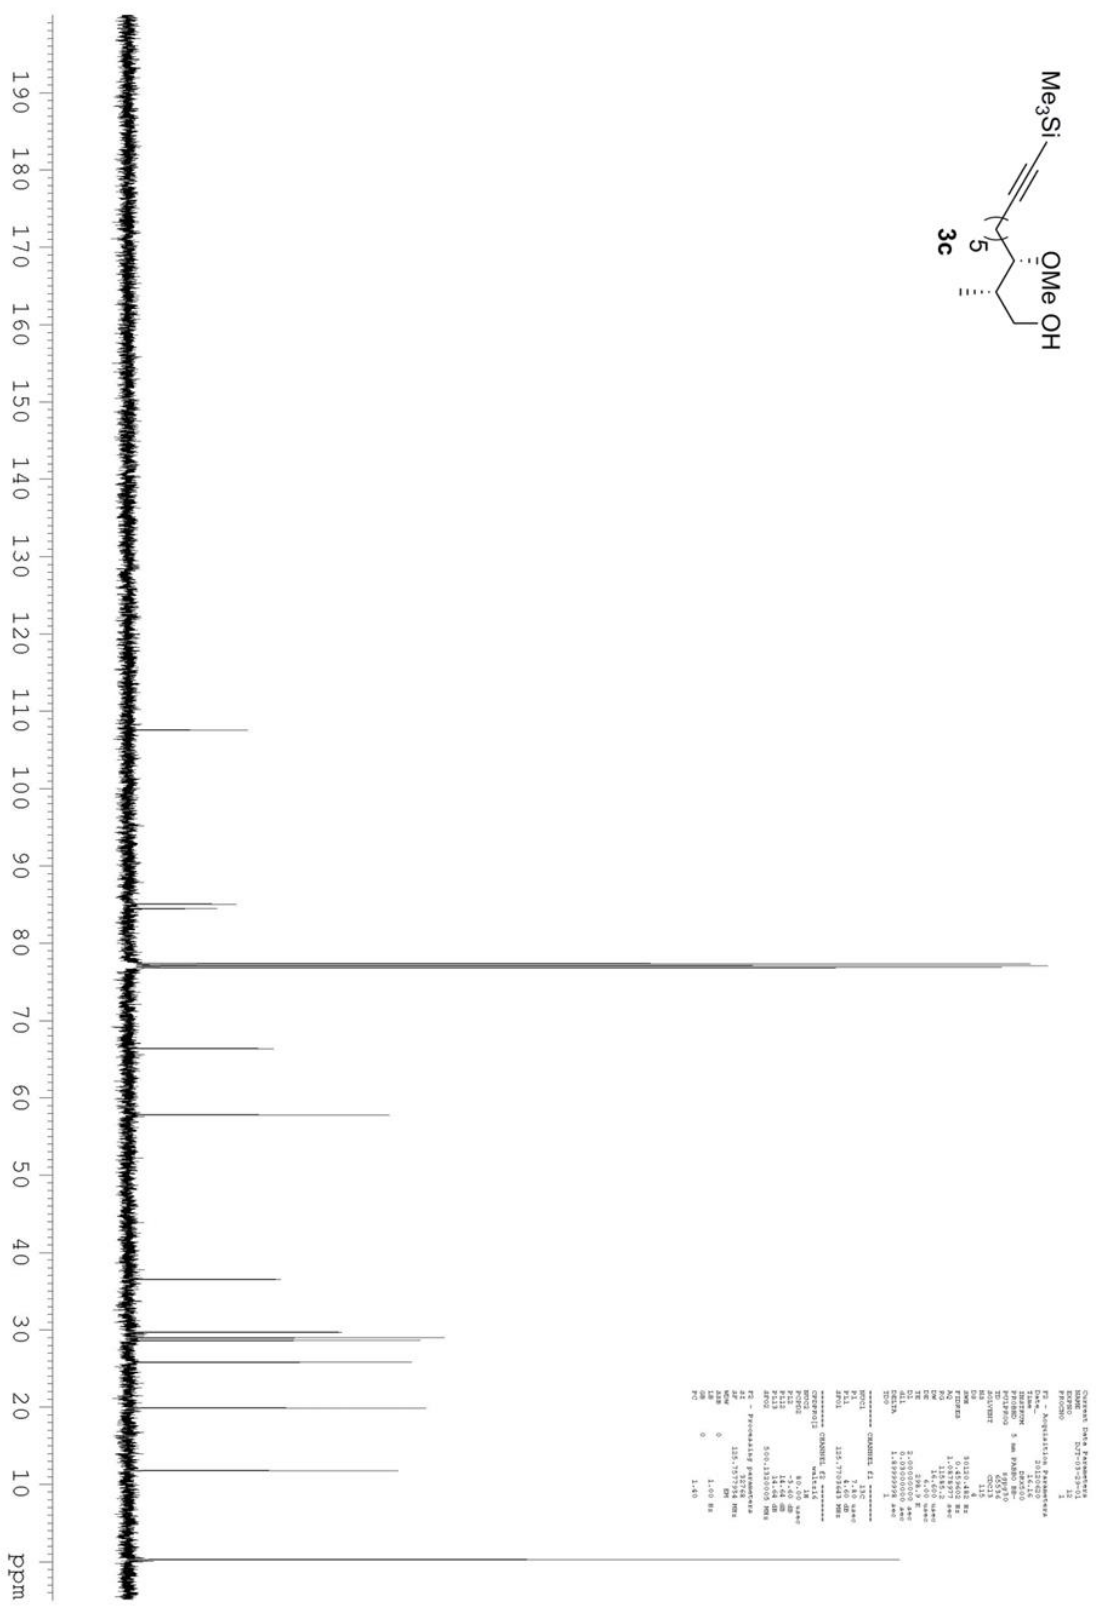





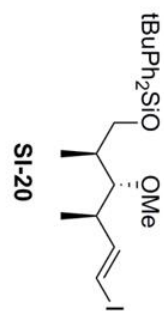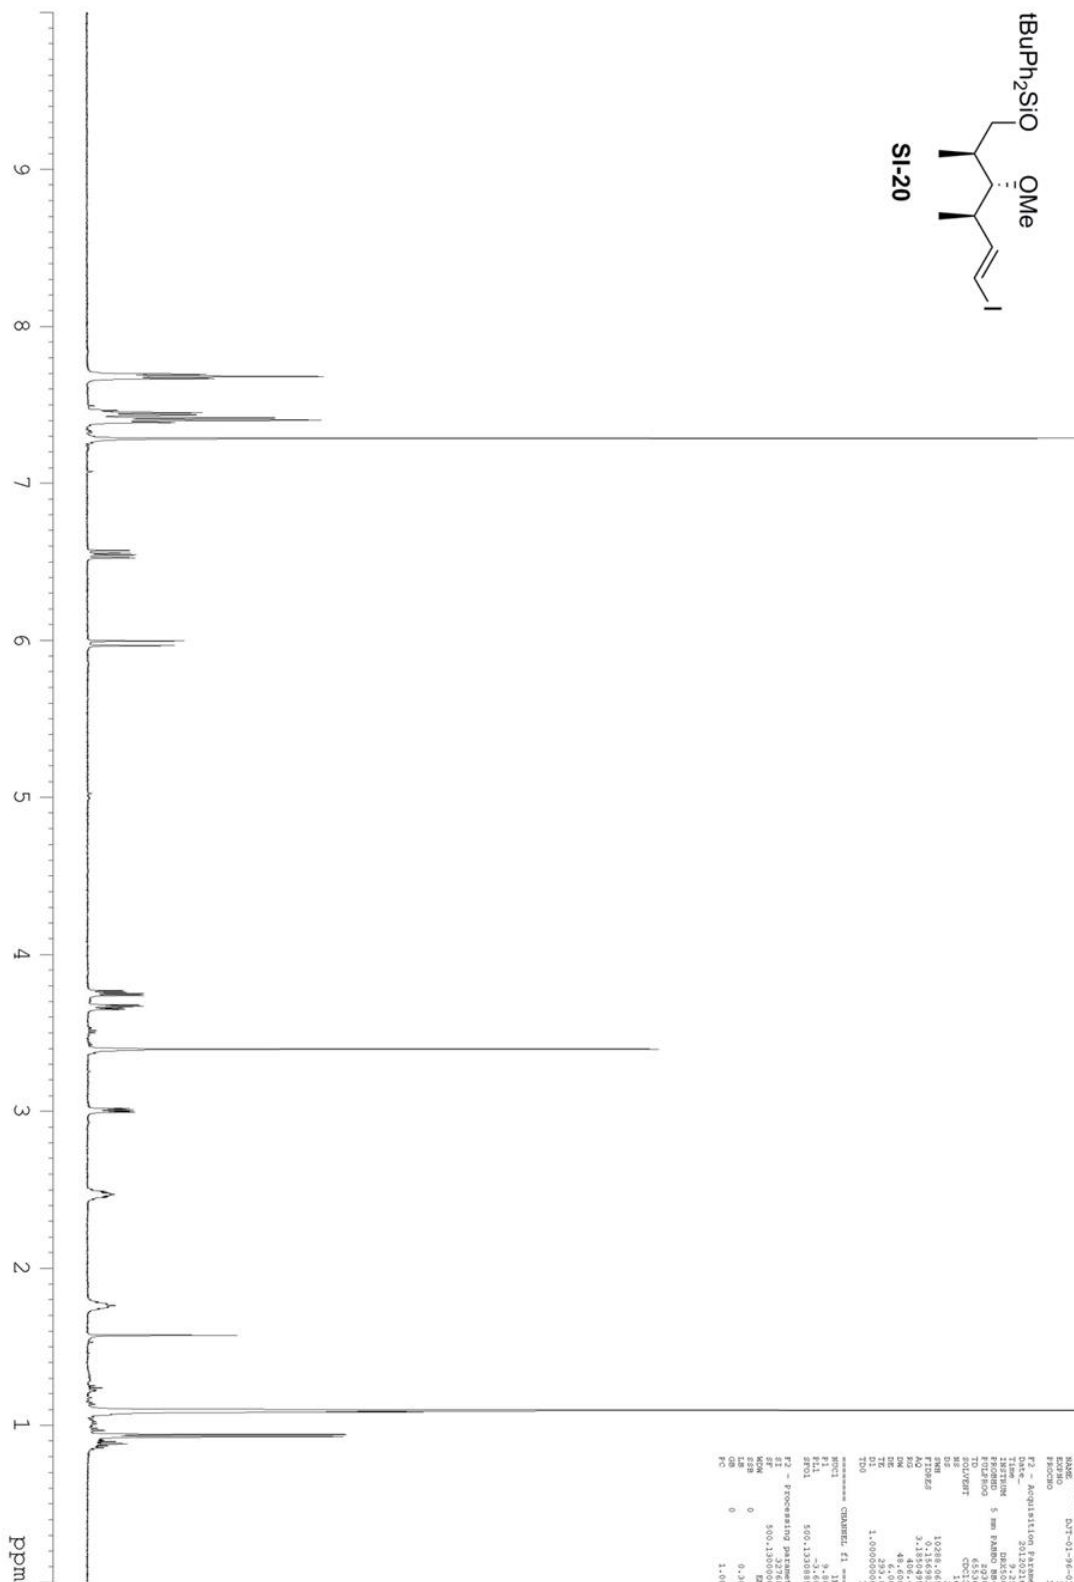

```

===== CHANNEL f1 =====
PROC1
P1 18
F1 500.130885 MHz
NUC1 13C
P2 - Acquisition Parameters
Date_ 20190911
Time 9:22
P1 18
P2 18
PROCNO 5
PROBHD 5 mm BBOBO
PULPROG zgpg30
TD 65536
SFO 500.130885 MHz
AQ 0.239
RG 327.5
WDW EM
SSB 0
GB 0
PC 1.000000000 sec
===== CHANNEL f2 =====
PROC2
P1 18
F1 500.130885 MHz
NUC1 13C
P2 - Processing parameters
SI 327.5
SF 500.130885 MHz
WDW EM
SSB 0
GB 0
PC 1.00
  
```





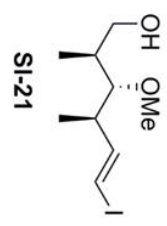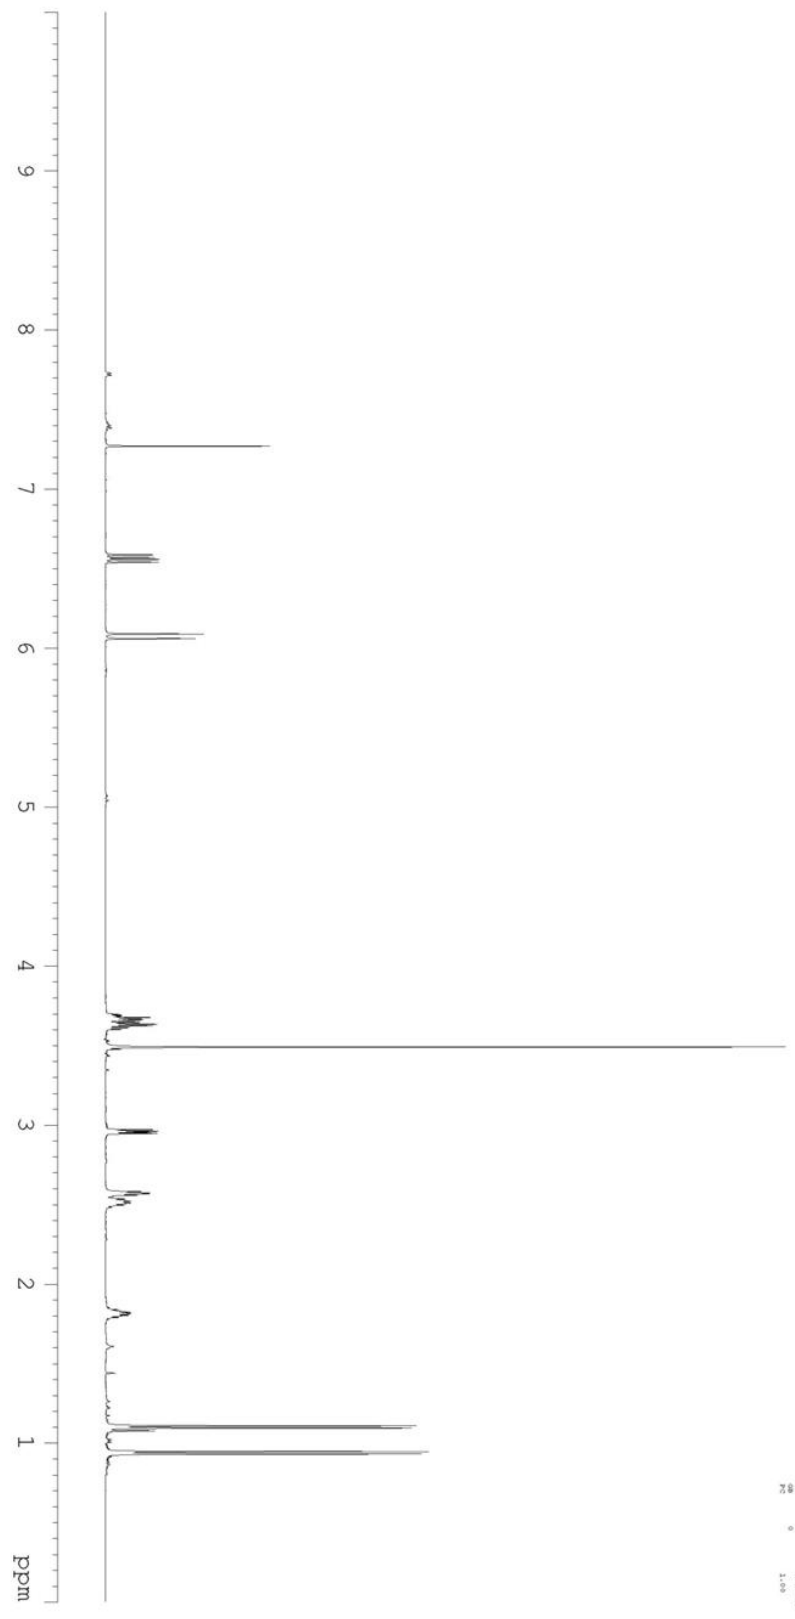

```

Name: SI-21
EXPNO: 1
PROCNO: 1
PROBHD: 5mm QNP 1H/13
PULPROG: zgpg30
Date_ Acquired: 20100714
Time: 12.00
INSTRUM: spect
PROBHD: 5mm QNP 1H/13
P1: 12.00
PCYCLE: 1
AQUANT: 0.00
RG: 327.50
AQ: 0.05000000
SFO1: 500.1313500 MHz
SFO2: 125.7613500 MHz
NUC1: 13C
NUC2: 1H
DECOUPL: none
===== CHANNEL f1 =====
NUC1: 13C
P1: 12.00
PCYCLE: 1
AQUANT: 0.00
RG: 327.50
AQ: 0.05000000
SFO1: 500.1313500 MHz
SFO2: 125.7613500 MHz
===== CHANNEL f2 =====
NUC1: 1H
P1: 12.00
PCYCLE: 1
AQUANT: 0.00
RG: 327.50
AQ: 0.05000000
SFO1: 500.1313500 MHz
SFO2: 125.7613500 MHz
=====

```

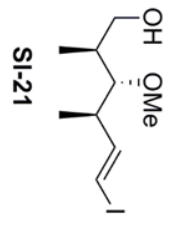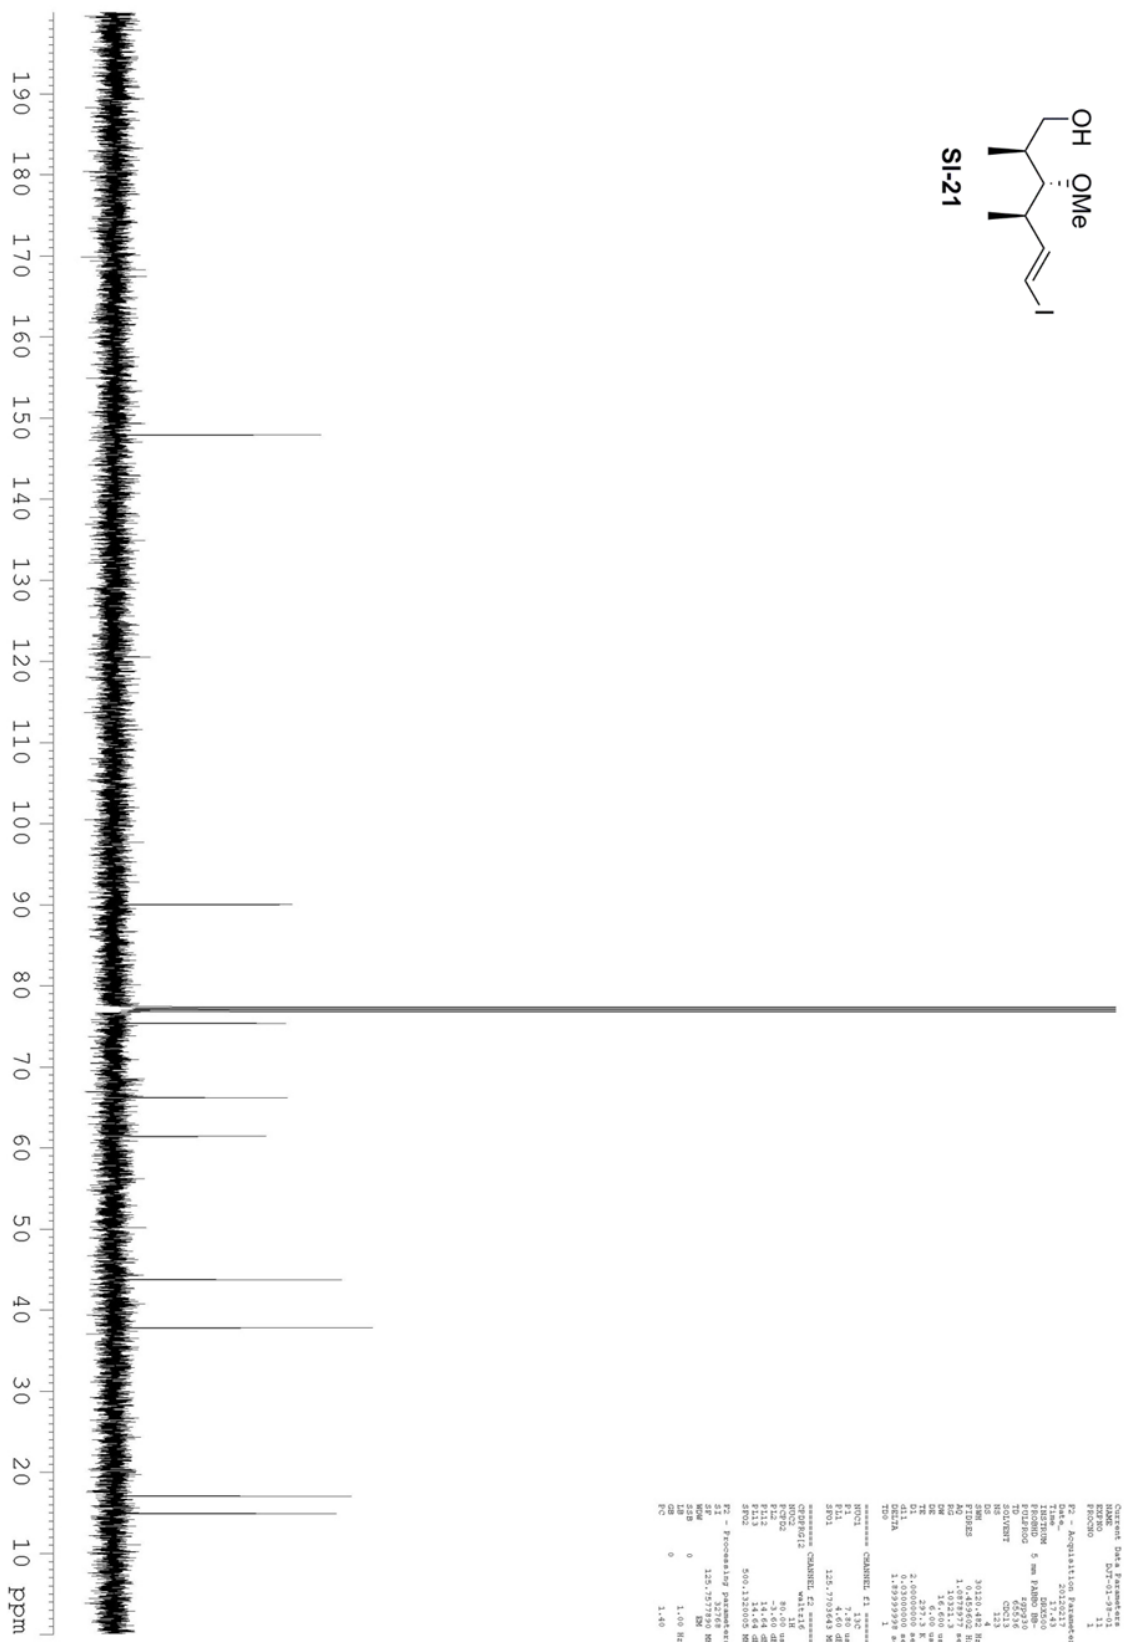

Current Data Parameters  
 NAME DT-01-18-01  
 EXPNO 1  
 PROCNO 1  
 F2 - Acquisition Parameters  
 Date\_ 20120217  
 Time 11:47  
 INSTRUM 5 mm BBO-CPD  
 PULPROG zgpg30  
 SFO2500  
 SOLVENT CDCl3  
 NS 4  
 DS 4  
 SWH 30220.481 Hz  
 AQ 0.0265  
 RG 1024  
 FIDRES 0.16000000  
 DE 6.00 usec  
 O1 2.00000000 usec  
 O2 1.00000000 usec  
 DELTA 1.00000000 usec  
 T0 1  
 ===== CHANNEL f1 =====  
 NUC 13C  
 P1 12.00 usec  
 PL1 0.00 dB  
 F1 125.760449 MHz  
 ===== CHANNEL f2 =====  
 CPDPRG2 waltz16  
 NUC2 1H  
 P2 19.00 usec  
 PL2 -2.00 dB  
 F2 500.1320000 MHz  
 P2 - Processing parameters  
 SI 125.757920 MHz  
 SF 0 MHz  
 GB 0  
 CB 0  
 LB 1.00 Hz  
 GB 0  
 RB 1.40



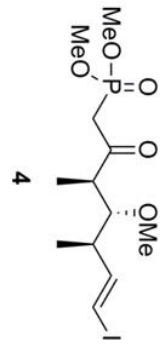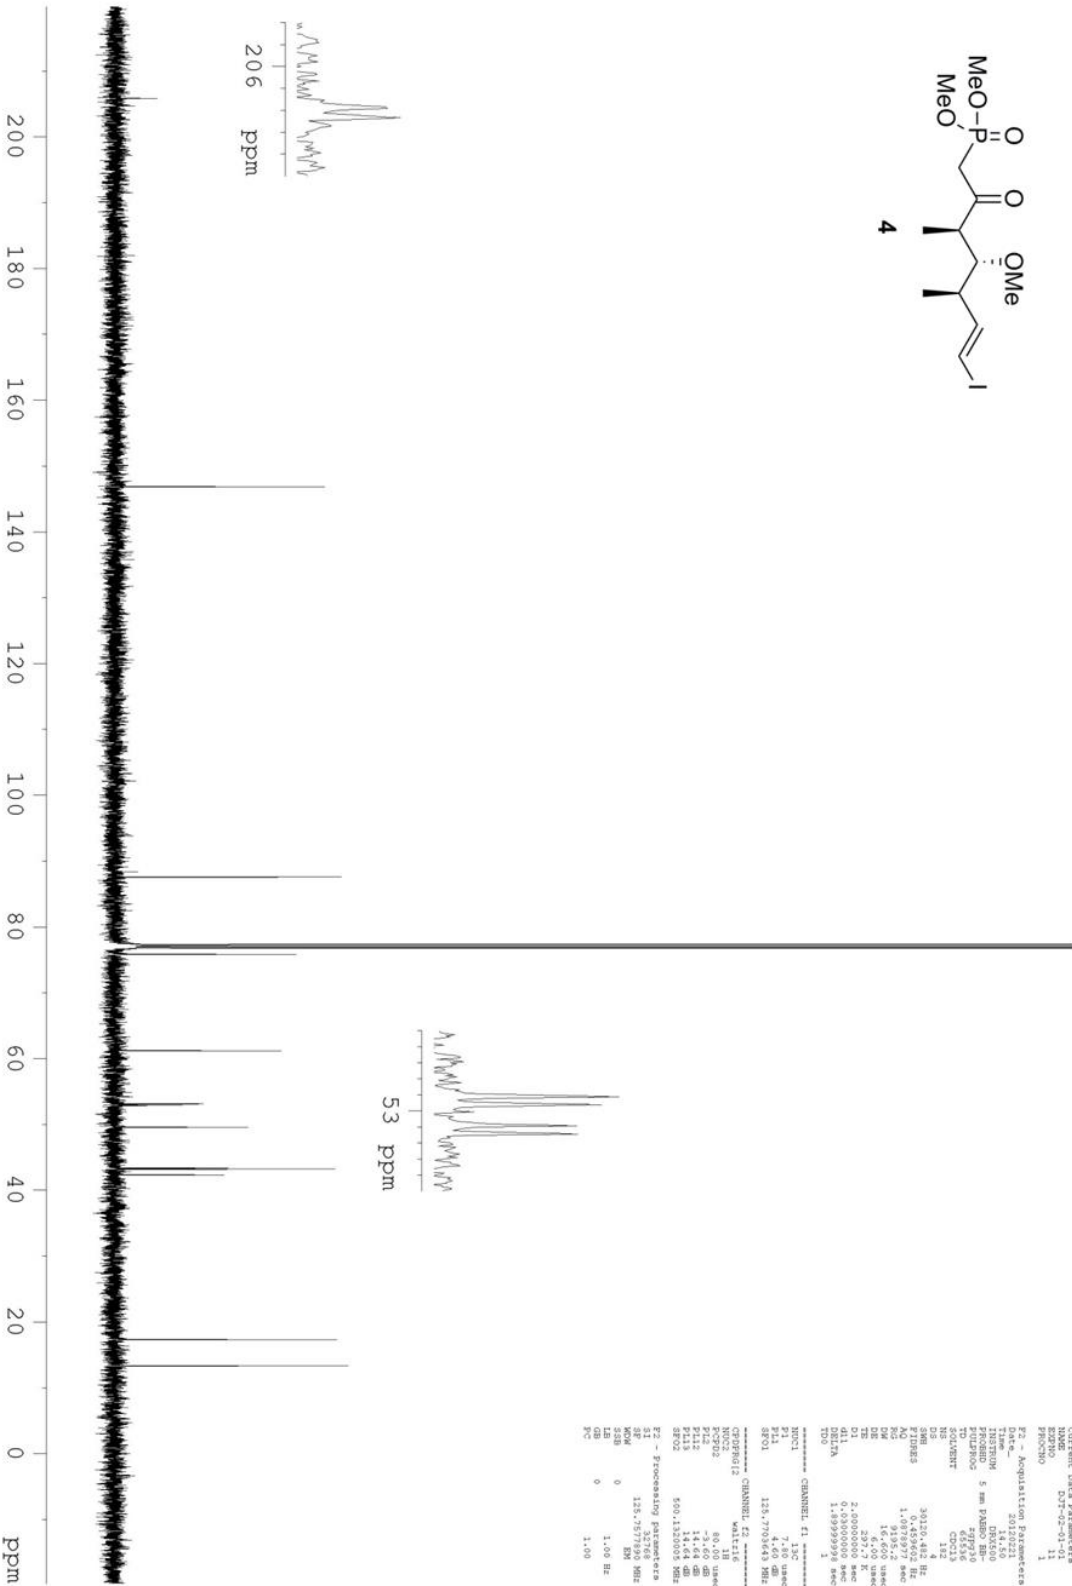

```

Current: Data Parameters
NAME: 207-02-01-01
EXPNO: 11
PROCNO: 1
F2 - Acquisition Parameters
Date_UTC: 20170804
Time: 14.50
PROBHD: 5 mm PABBO BB
PULPROG: zgpg30
SOLVENT: CDCl3
AQ: 1.00
RG: 320
DS: 4
SWH: 30120.481 Hz
AQ: 0.00829 sec
F2 - Processing parameters
SI: 32768
SF: 125.760369 MHz
WDW: EM
SSB: 0
LB: 1.008 Hz
GB: 0
PC: 1.00
===== CHANNEL f1 =====
NUC1: 13C
P1: 7.142 usec
PL1: 0.00 dB
SFO1: 125.770369 MHz
===== CHANNEL f2 =====
NUC2: 13C
P2: 7.142 usec
PL2: 0.00 dB
SFO2: 125.770369 MHz
===== CHANNEL f3 =====
NAME: WALTZ16
NUC3: 1H
PCPDPRG2:
PCPDPRG1:
PCPDPRG0: 80.000 usec
SF3: 500.136053 MHz
SF2: 500.136053 MHz
SF1: 500.136053 MHz
F2 - Processing parameters
SI: 32768
SF: 125.767930 MHz
WDW: EM
SSB: 0
LB: 1.008 Hz
GB: 0
PC: 1.00

```



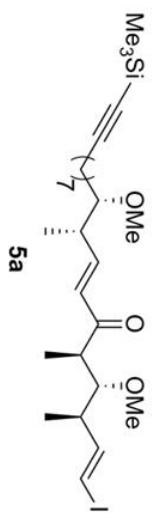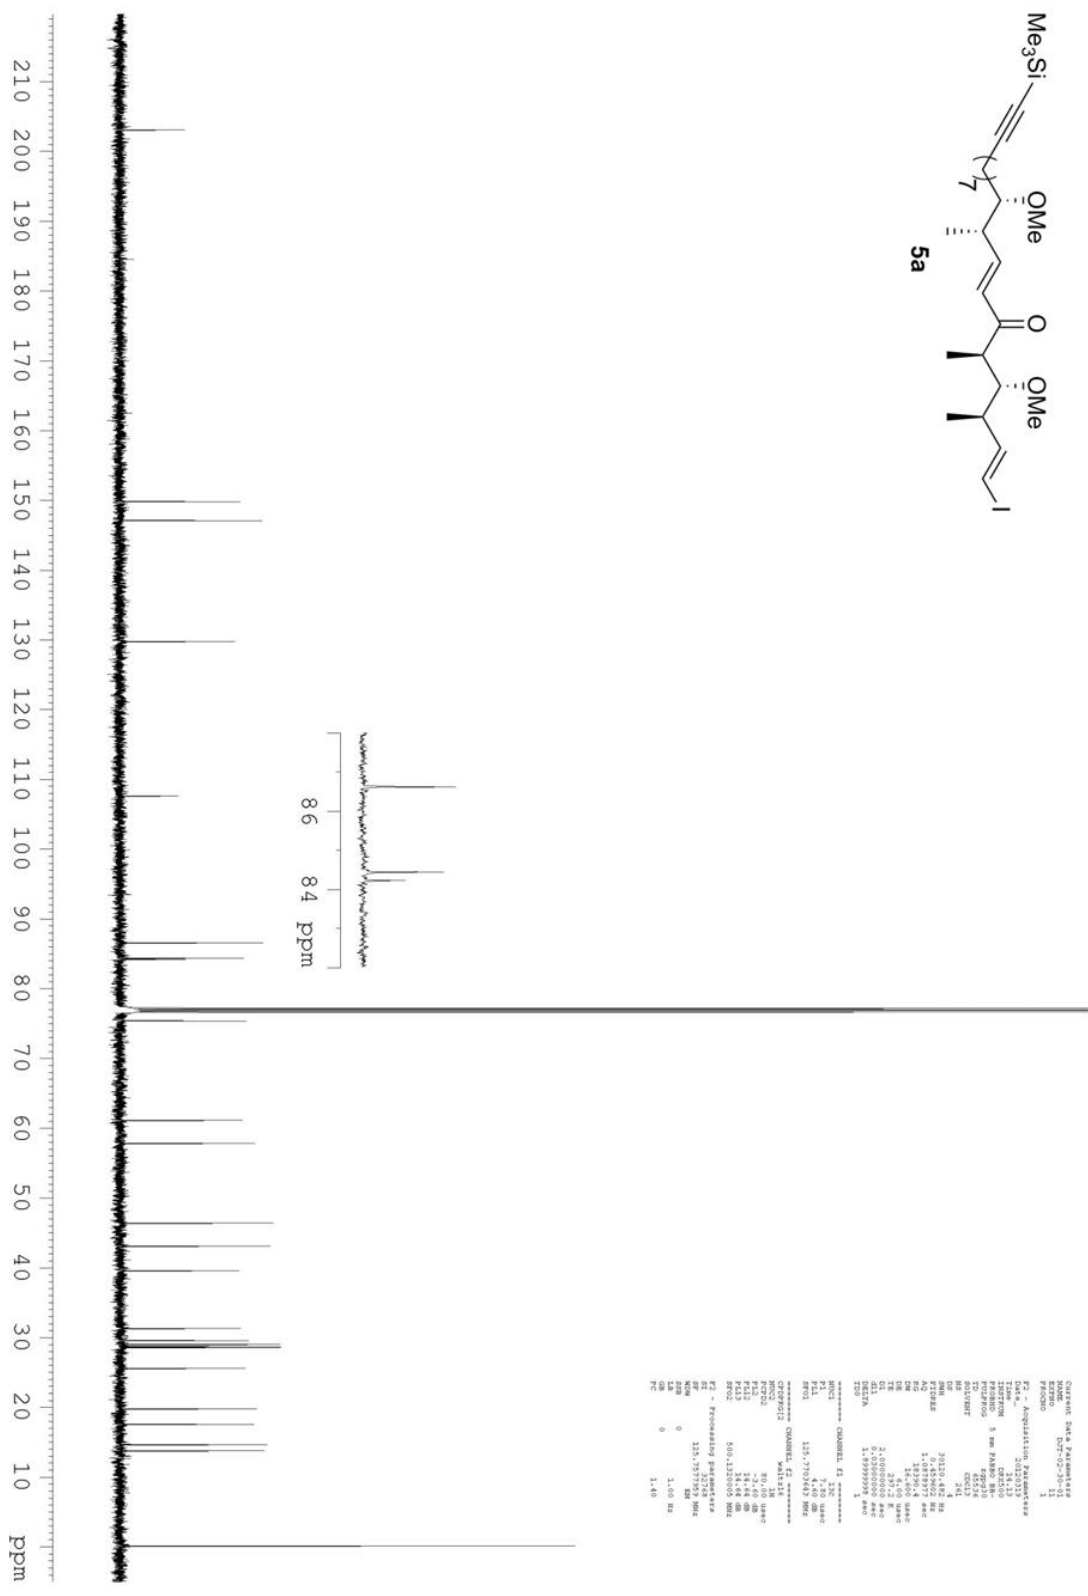

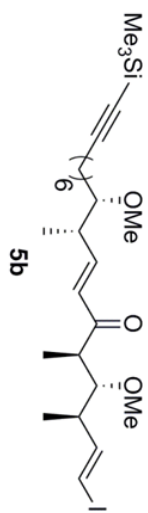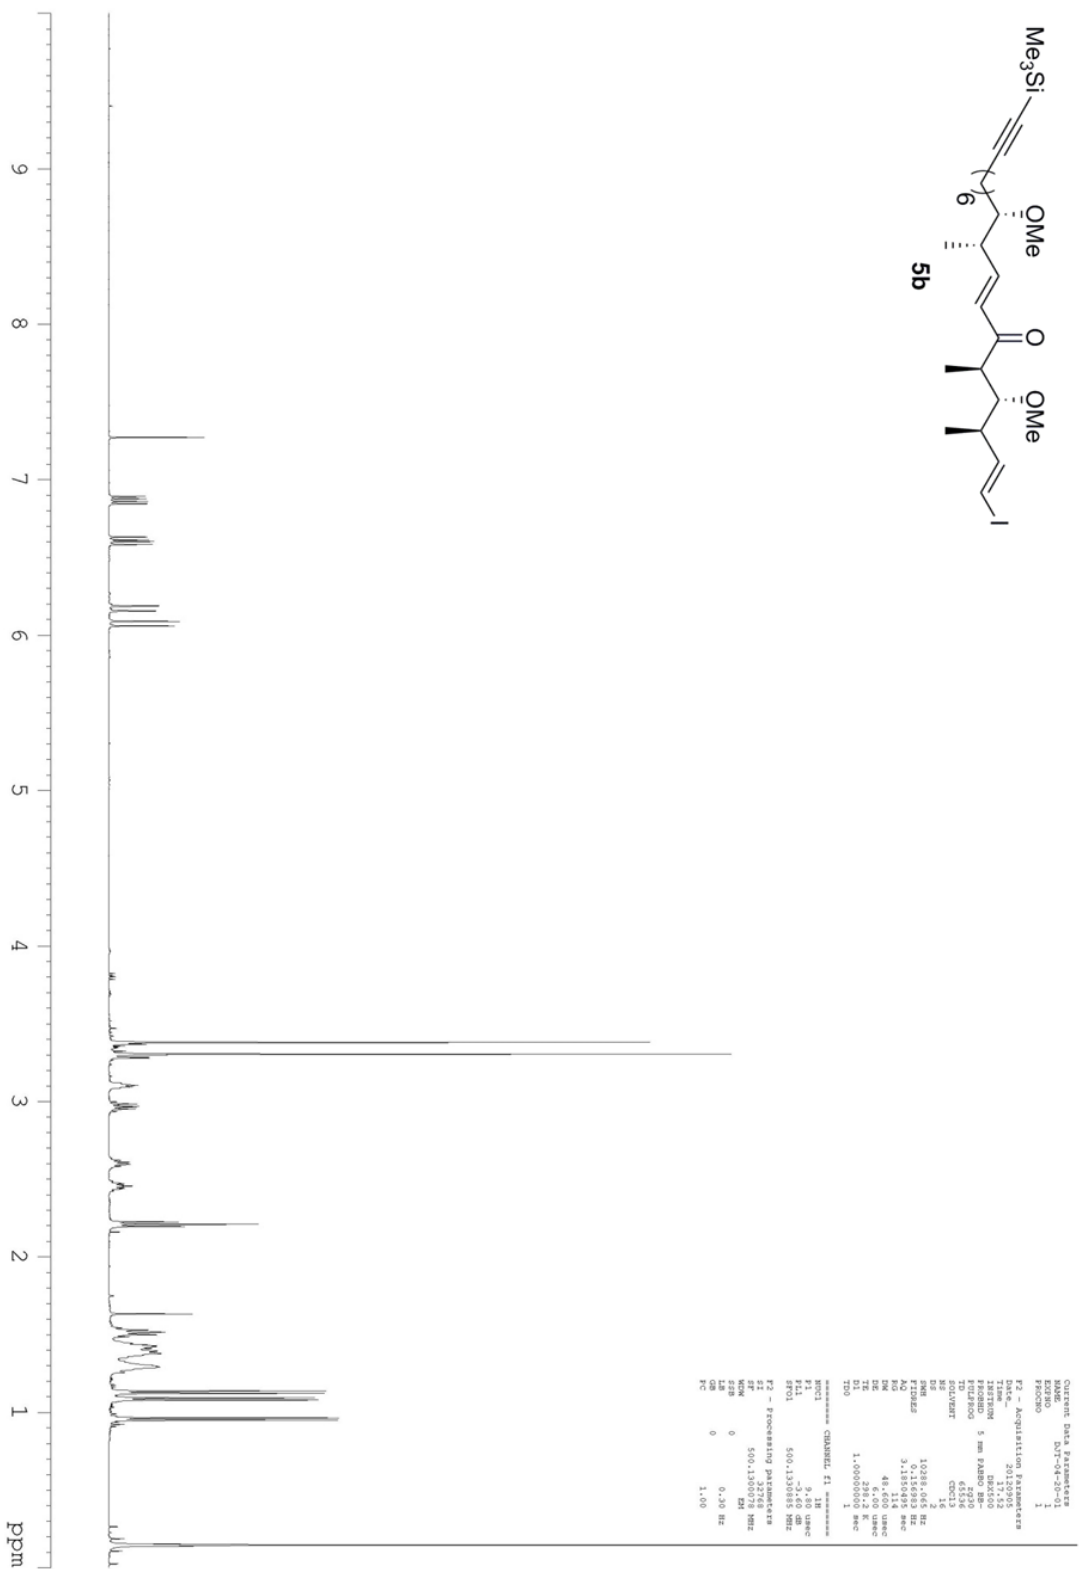





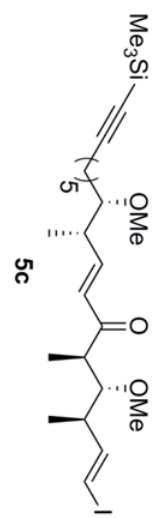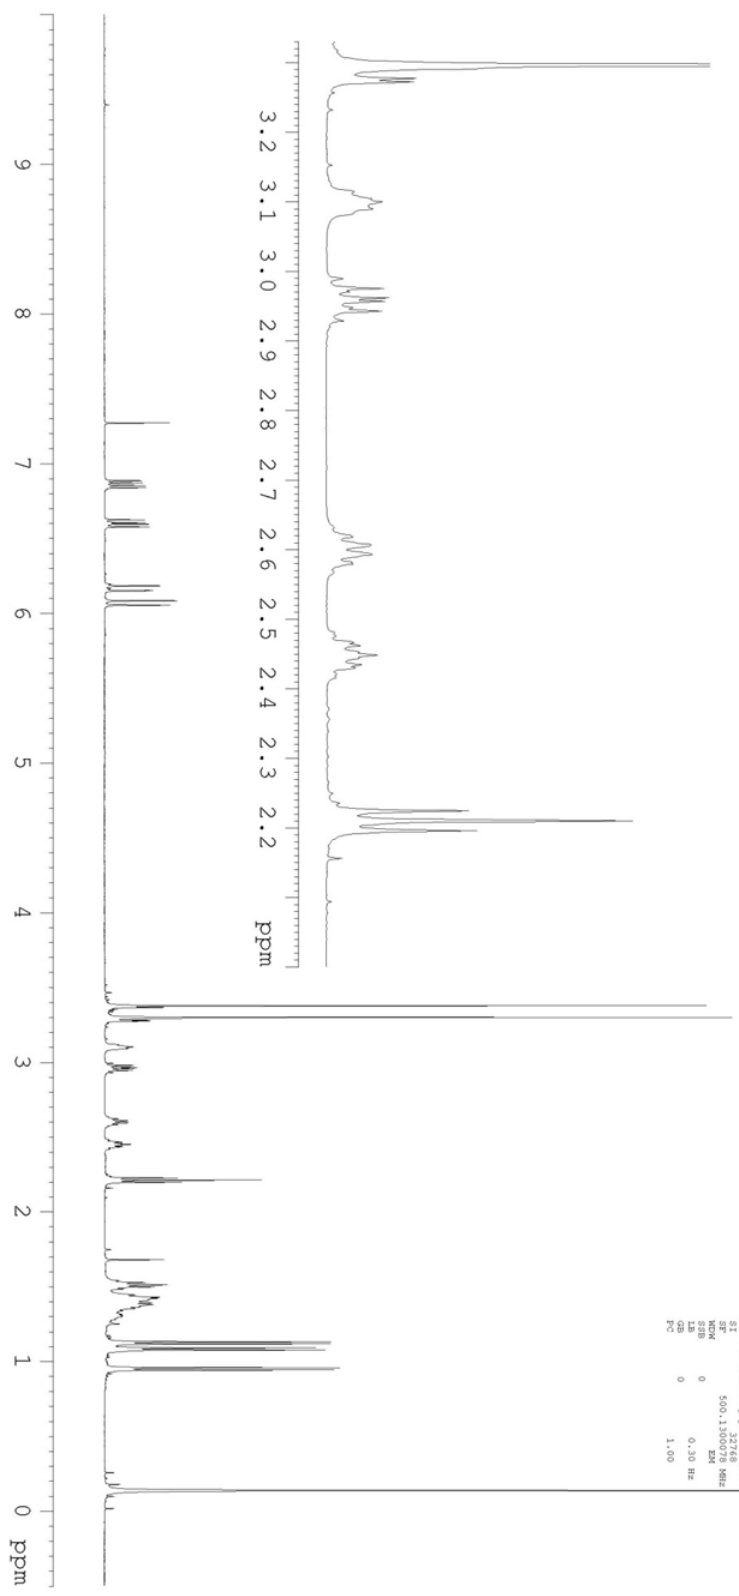

Current Data Parameters  
 NAME: D-T-03-56-01  
 EXPNO: 1  
 PROCNO: 1  
 F2 - Acquisition Parameters  
 Date\_Time: 20140715 11:33  
 INSTRUM: spect  
 PROBMOD: 5 mm BBO-BB  
 PULPROG: zgpg30  
 FIDRES: 0.16383 Hz  
 SOLVENT: CDCl3  
 NS: 16  
 DS: 4  
 SFO: 10281.025 Hz  
 FIDRES: 0.156983 Hz  
 AQ: 0.19000000 sec  
 DM: 48.400 usec  
 DE: 71.9 usec  
 TE: 284.2 K  
 D1: 1.00000000 sec  
 D11: 1  
 ===== CHANNEL f1 =====  
 Name: f1  
 P1: 9.40 usec  
 PL1: -2.40 dB  
 Freq: 500.1300000 MHz  
 F2 - Processing parameters  
 SI: 32768  
 SF: 500.1300078 MHz  
 MD: 32K  
 LB: 0.30 Hz  
 GB: 0  
 PC: 1.00



```

Current Data Parameters
Name: D27-02-24-11
Date:
Time: 1
PROCNO: 1
F2 - Acquisition Parameters
Date_ Acq: 20120224
Time: 13:43
Instr: spect
PROBHD: 5 mm PABBO BH-
PULPROG: zgpg30
TE: 300.2
TD: 65536
AQ: 1.00000000
RG: 327.680
WDW: EM
SSB: 0
GB: 0
PC: 1.00000000
FREQ: 125.7612500 MHz
NUC1: 13C
P1: 12.00000000
PL1: 0.00
PL2: 0.00
PL3: 0.00
PL4: 0.00
PL5: 0.00
===== CHANNEL f2 =====
NUC2: 13C
P2: 12.00000000
PL2: 0.00
PL3: 0.00
PL4: 0.00
PL5: 0.00
===== CHANNEL f1 =====
NUC3: 13C
P3: 12.00000000
PL3: 0.00
PL4: 0.00
PL5: 0.00
===== CHANNEL f0 =====
GRPPRG2: WALTZ16
PCPD2: 90.00000000
PCPD1: 90.00000000
PFL2: 500.1250000 MHz
PFL1: 500.1250000 MHz
F2 - Processing parameters
SI: 32768
SF: 125.7612500 MHz
WDW: EM
SSB: 0
GB: 0
PC: 1.00000000
AQ: 1.00000000

```

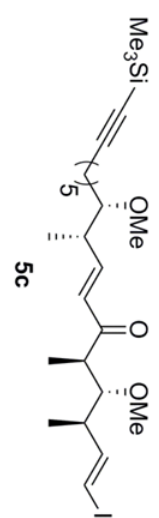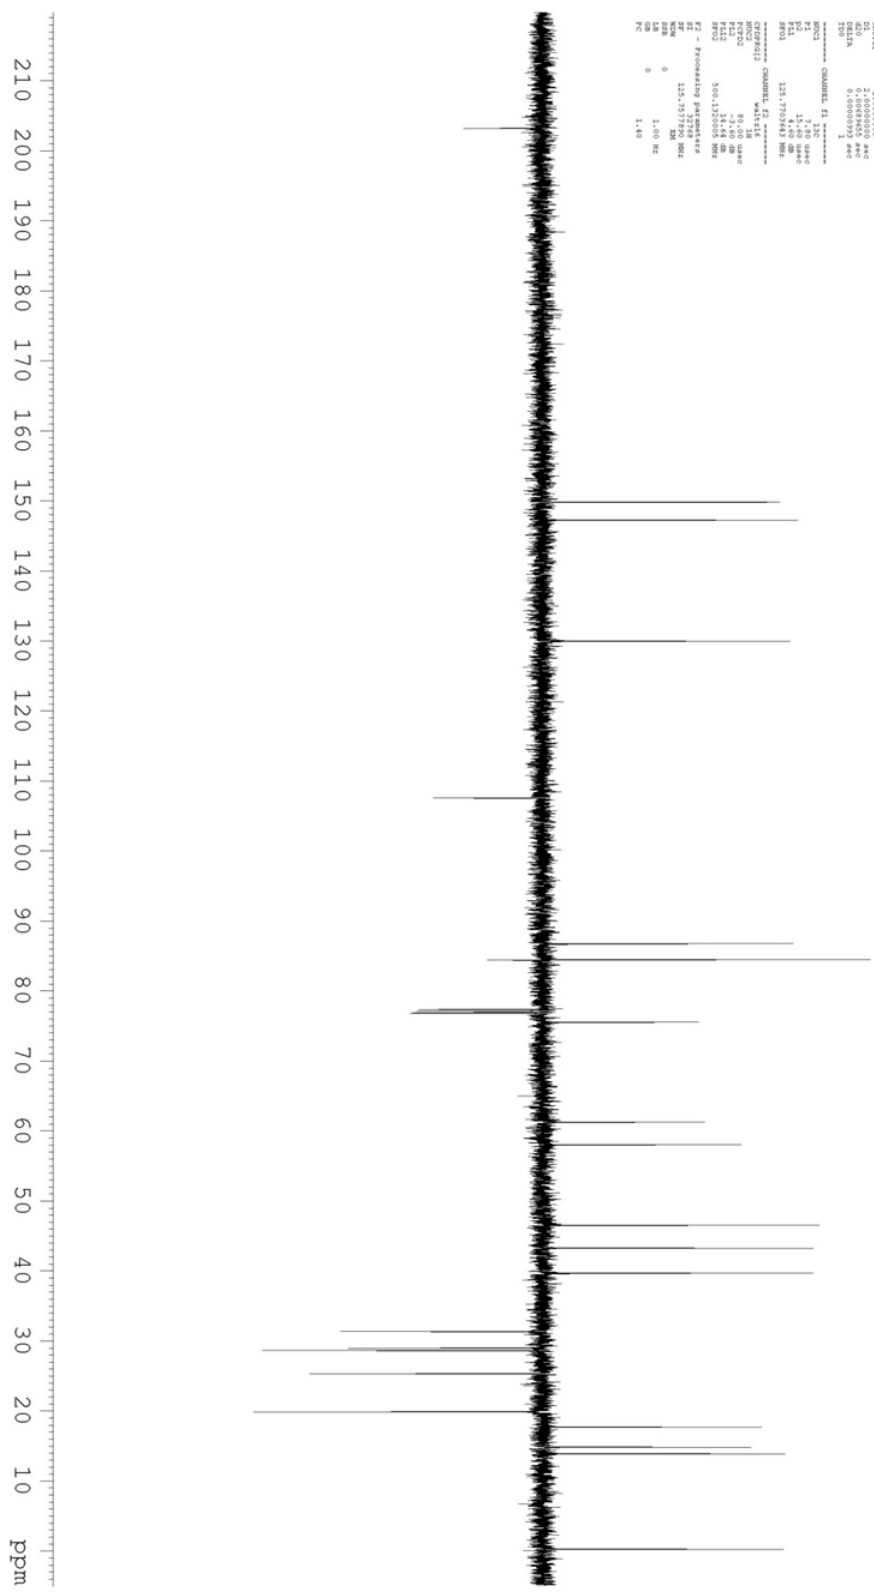

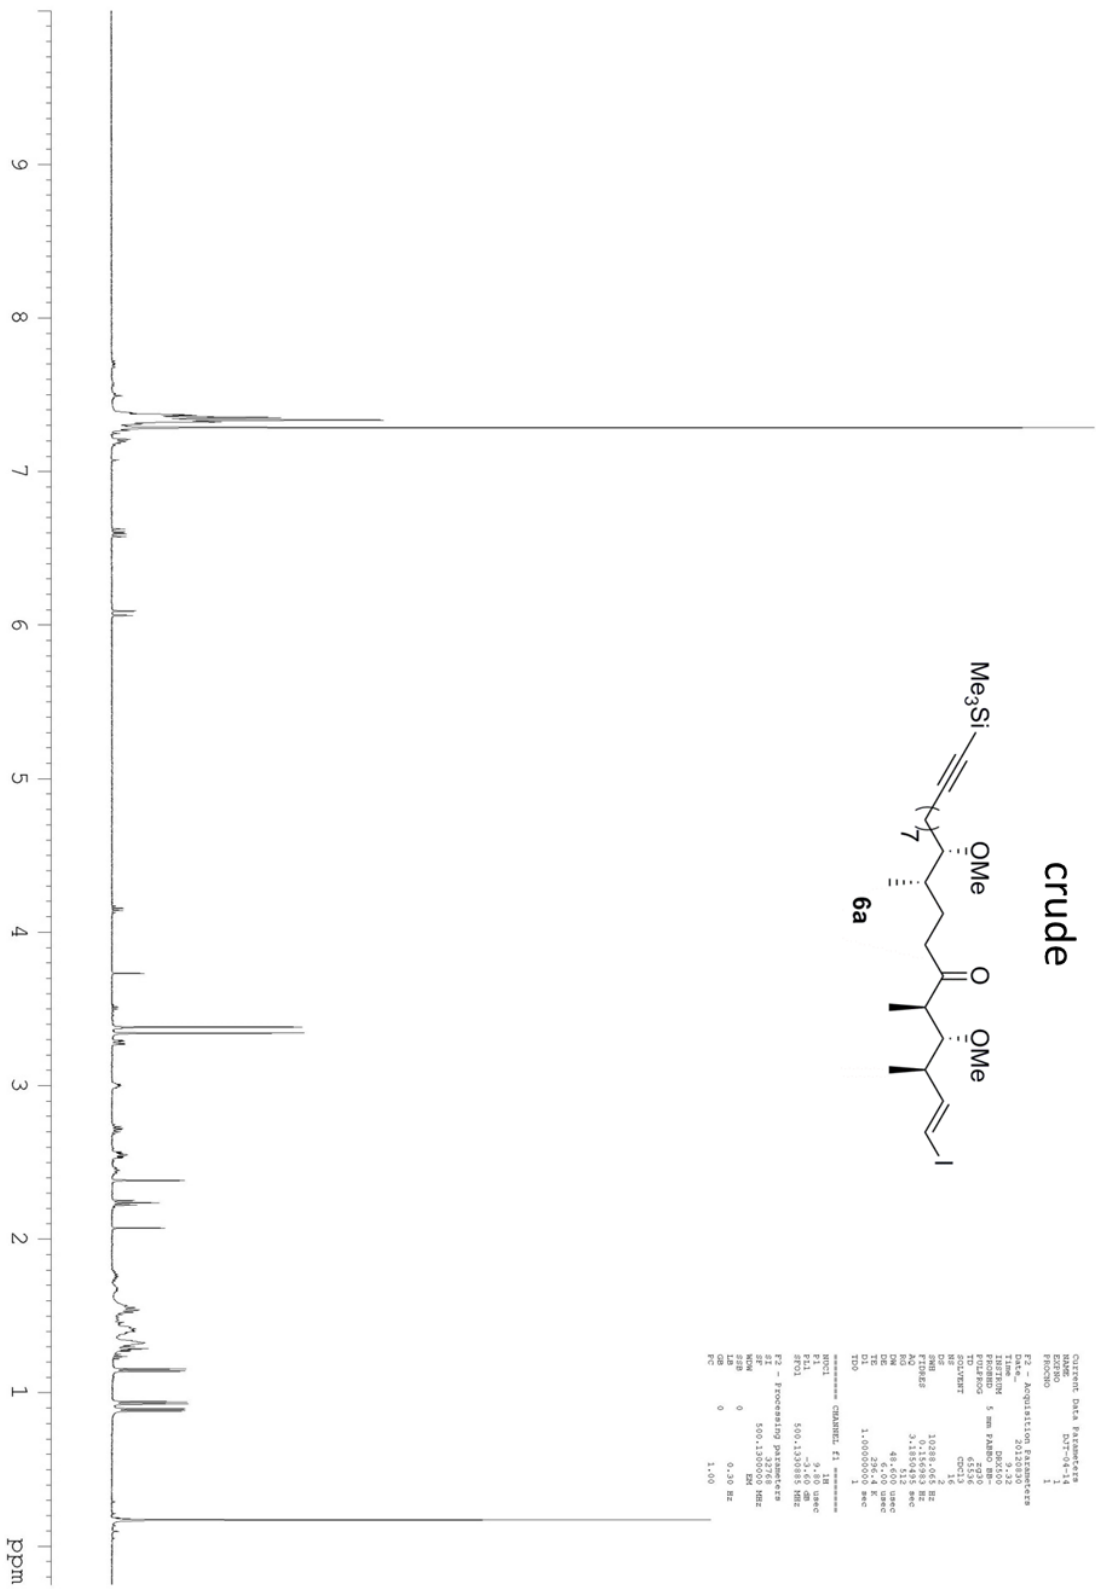





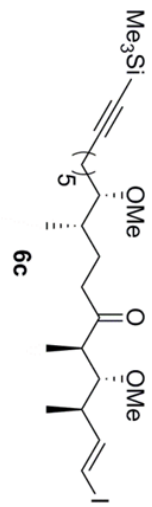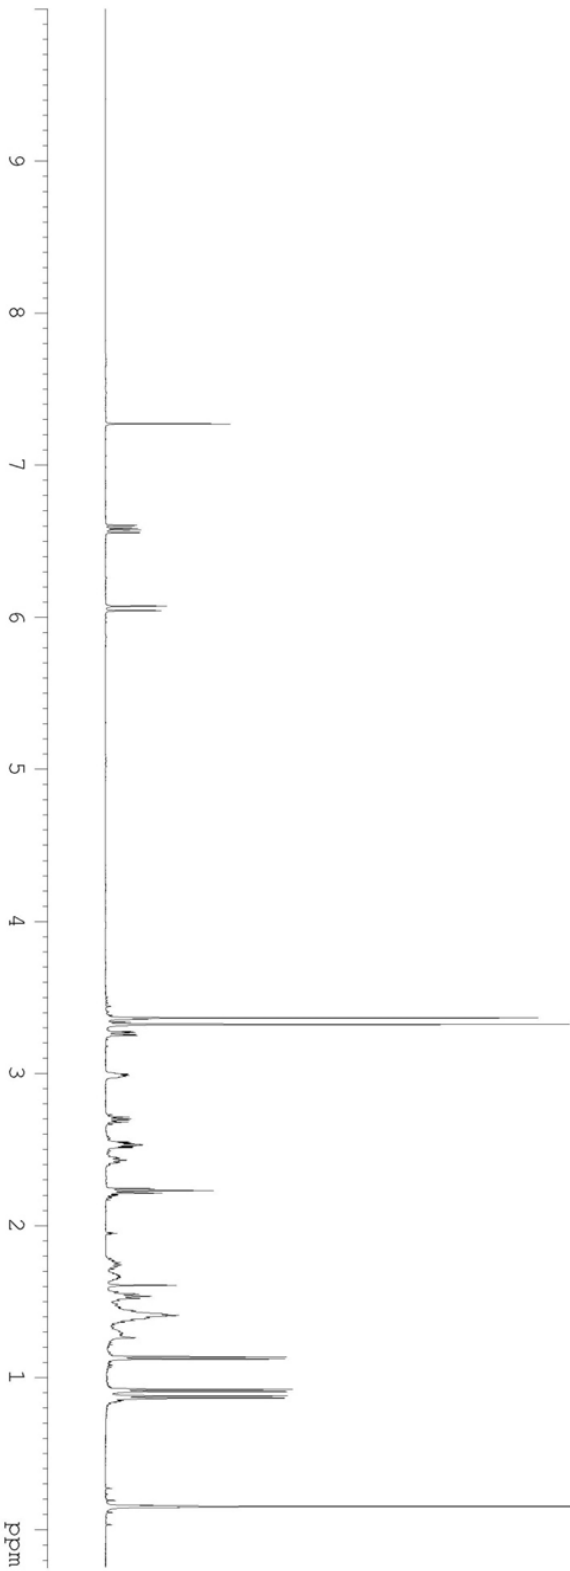

Experiment Data Parameters  
 NAME: D2T-53-73-01  
 EXPNO: 3  
 PROCNO: 1  
 F2 - Acquisition Parameters  
 Date\_ : 2011-07-14  
 Time: 14:07  
 INSTRUM: spect  
 PROBNM: 5 mm BBOXBO  
 PULPROG: zgpg30  
 SOLVENT: CDCl3  
 NS: 16  
 DS: 4  
 SWH: 10283.045 Hz  
 FIDRES: 0.156993 Hz  
 AQ: 0.0800000 sec  
 RG: 327  
 INEPT: 143.7  
 DE: 48.000 usec  
 TE: 296.6 K  
 D1: 1.00000000 sec  
 ===== CHANNEL f1 =====  
 NUC1: 1H  
 P1: 3.00 usec  
 PL1: 0.00 dB  
 SFO1: 500.130889 MHz  
 F2 - Processing parameters  
 SI: 32768  
 SF: 500.1300072 MHz  
 WDW: EM  
 SSB: 0  
 GB: 0  
 PC: 1.00



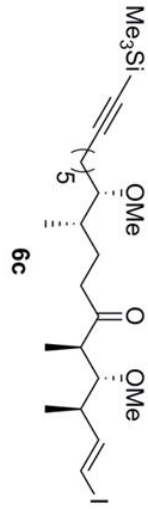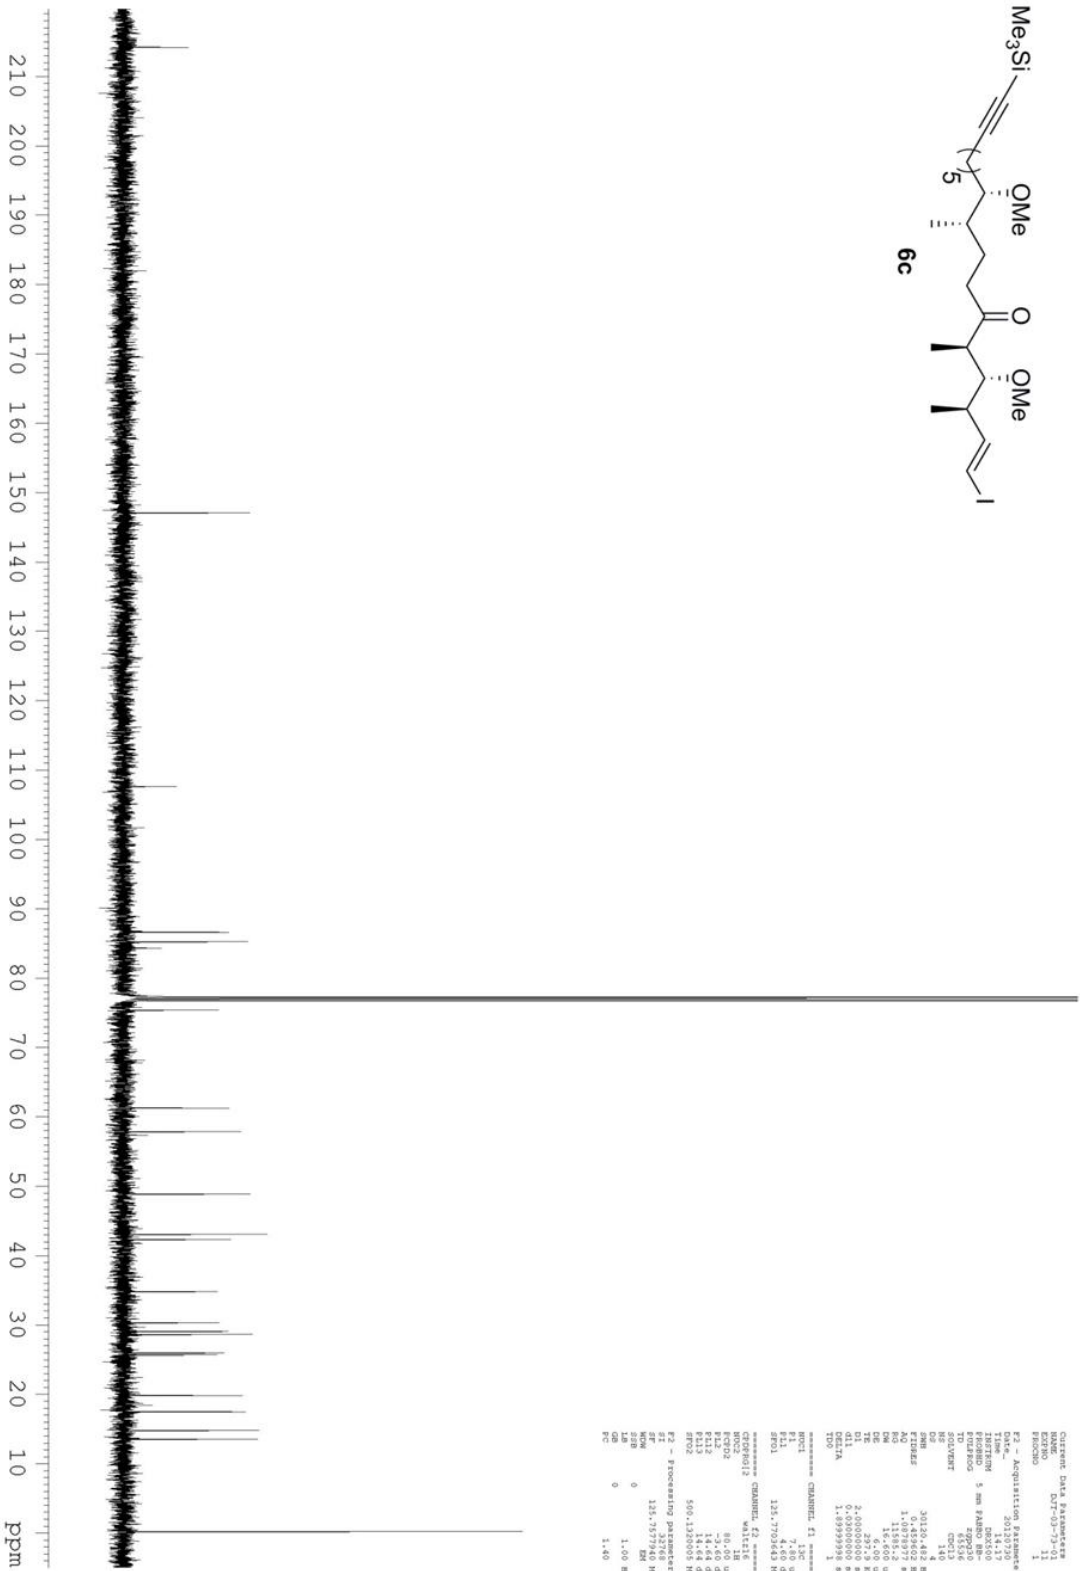

```

===== CHANNEL F1 =====
NUC1 13C
P1 4.00
SFO1 125.7703443 MHz
===== CHANNEL F2 =====
NUC2 1H
P2 16.00
SFO2 500.1300000 MHz
=====
PROC12
SI 32768
SF 500.1300000 MHz
WDW EM
SSB 0
LB 0
GB 0
PC 1.60
===== Acquisition Parameters =====
Date_ 20120720
Time 14:17
INSTRUM spect
PROBHD 5 mm BBO BO-
TD 65536
AQ 0.65338
RG 327.68
WDW EM
SSB 0
LB 0
GB 0
PC 1.60
=====
===== Processing parameters =====
SI 32768
SF 500.1300000 MHz
WDW EM
SSB 0
LB 0
GB 0
PC 1.60

```

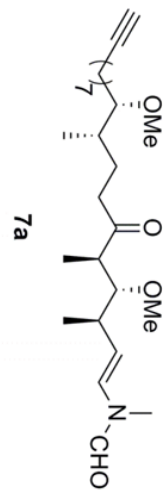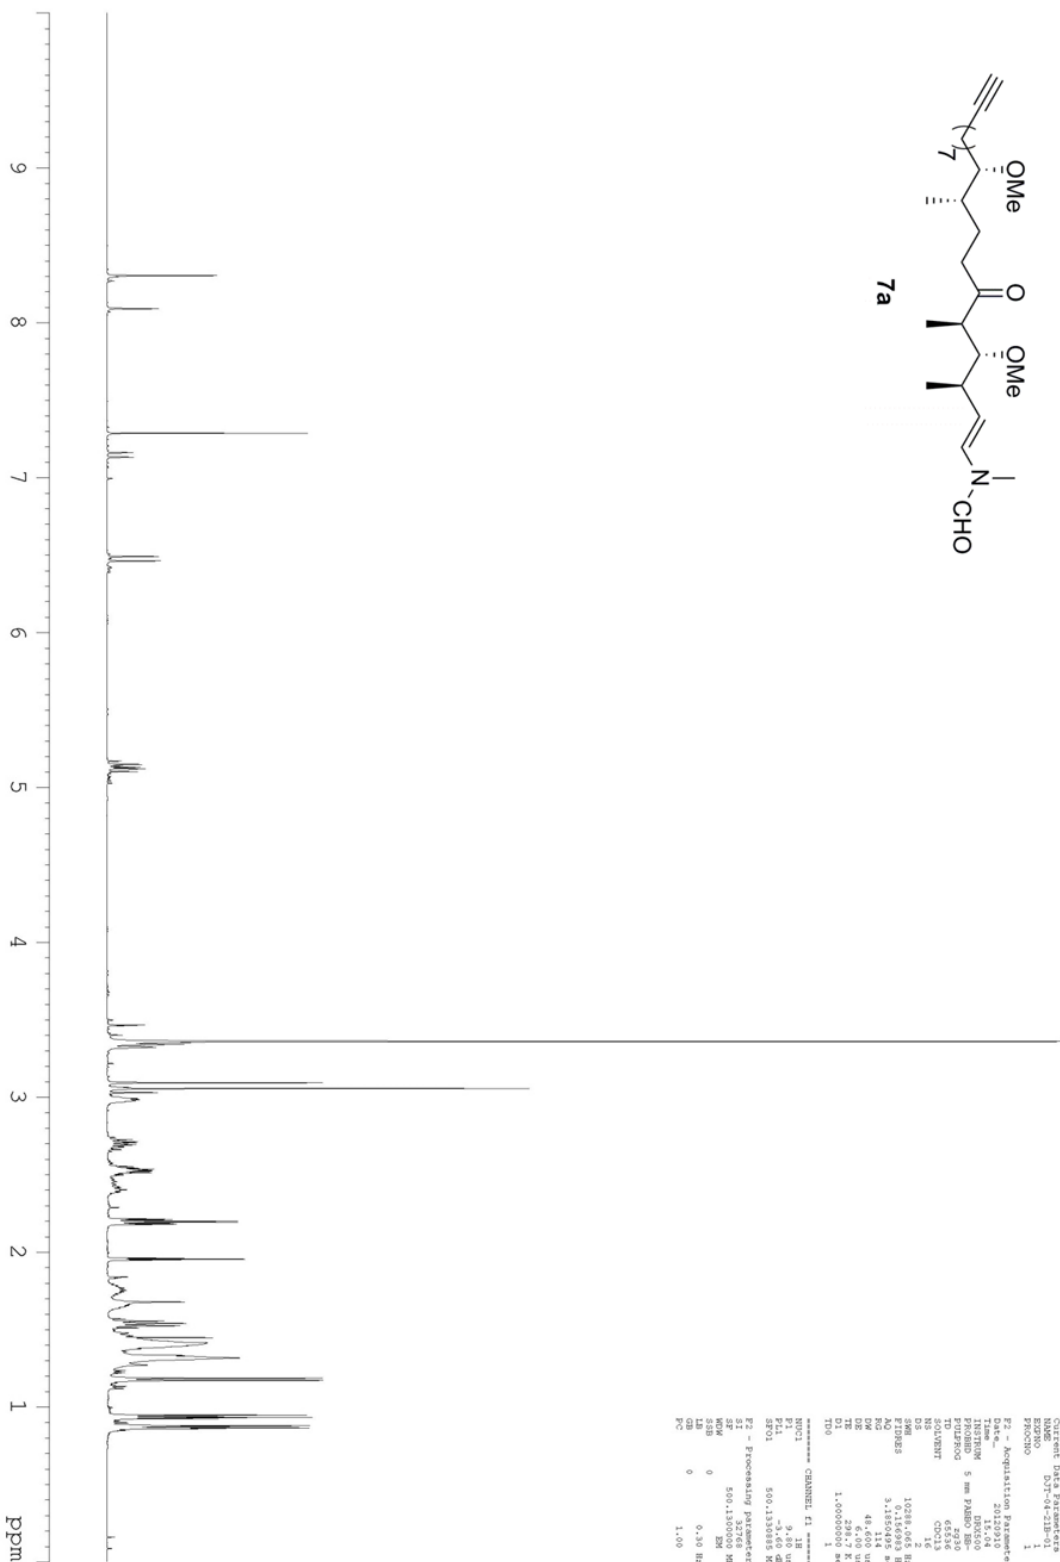

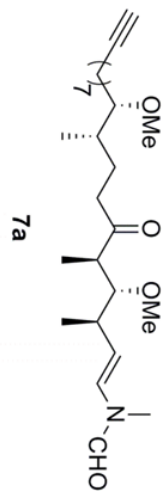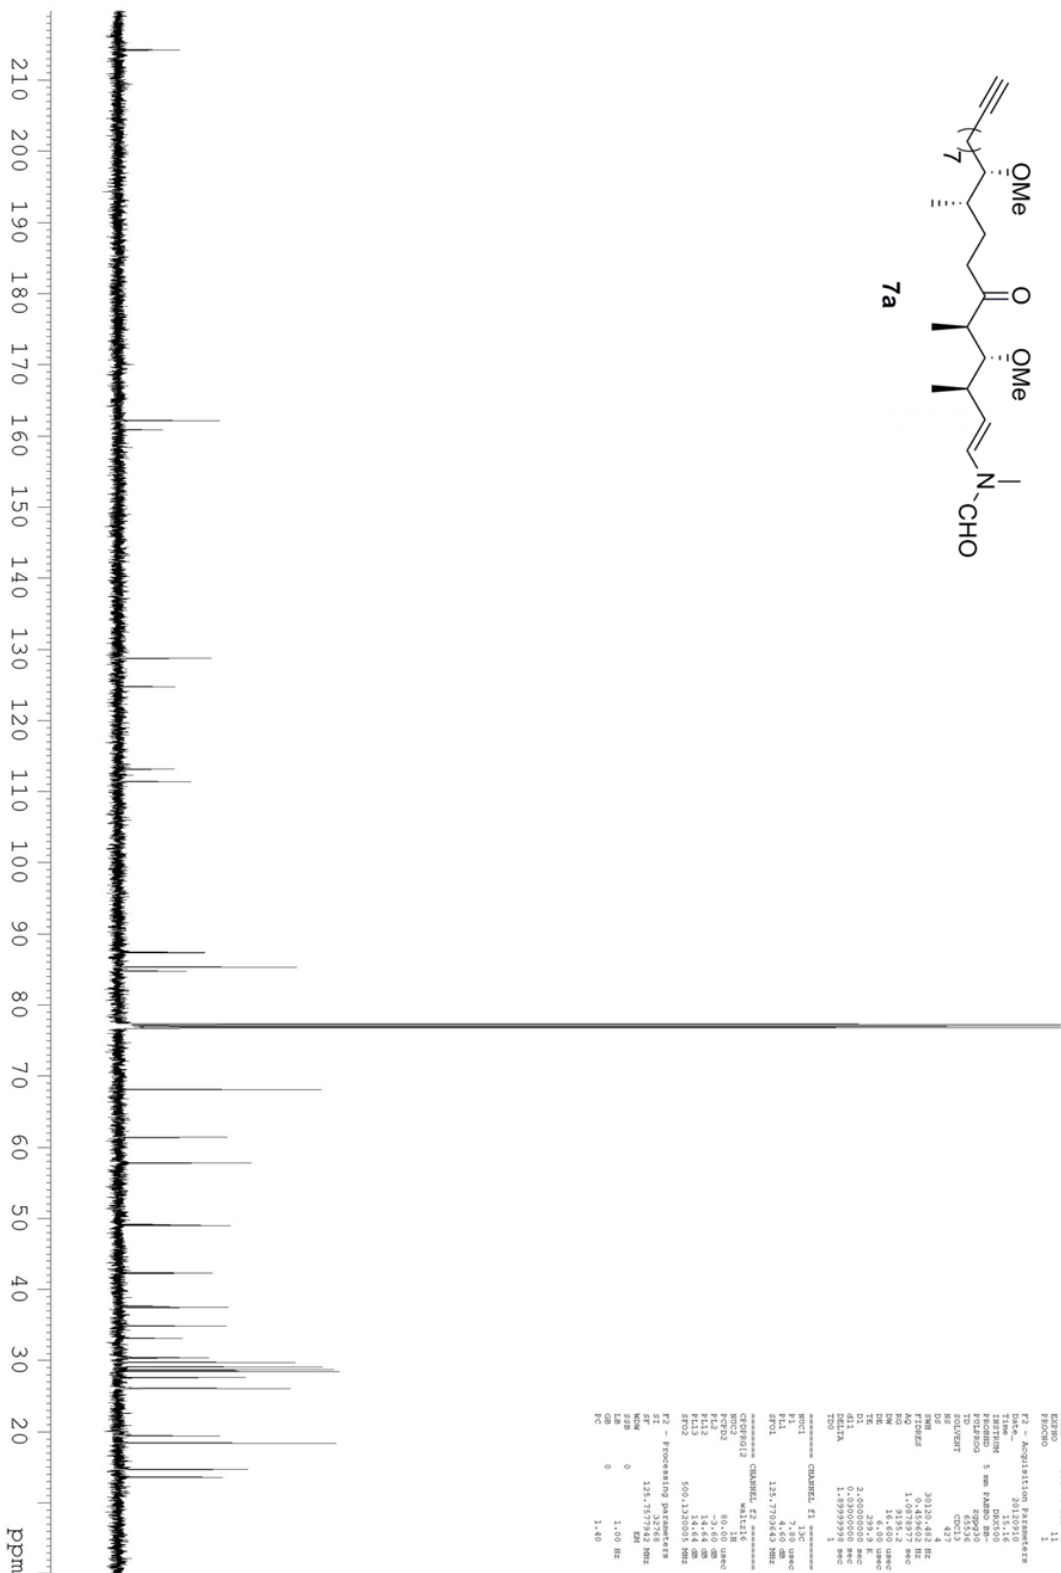

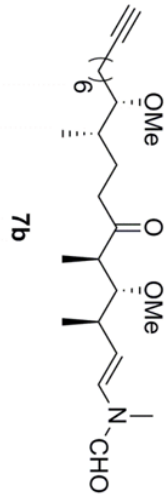

```

===== CHANNEL f1 =====
Date_      20131122
Time_      12:44
INSTRUM    DSK600
PROBHD     5 mm PABBO 5
PULPROG    zgpg30
TD         65536
AQ         6.00
RG         4
RG2        4
SOLVENT    CDCl3
DS         2
SFO1       100.628468 Hz
SFO2       100.628468 Hz
AQ ACQUIS  3.1800495 sec
DE         6.00
TE         300.2 K
T0         1.000000000
===== CHANNEL f1 =====
NUC1       1H
P1         12.00
P11        3.45
SFO1       500.1300885 MHz
===== CHANNEL f2 =====
P2 - Processing parameters
SI         32768
SF         500.1300138 MHz
WDW        EM
SSB        0
GB         0.30
PC         1.00
  
```

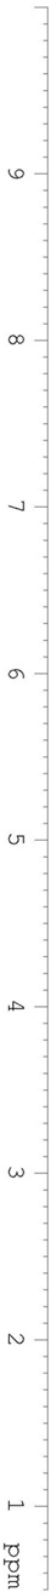

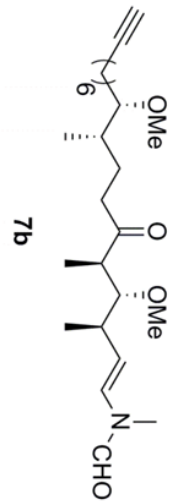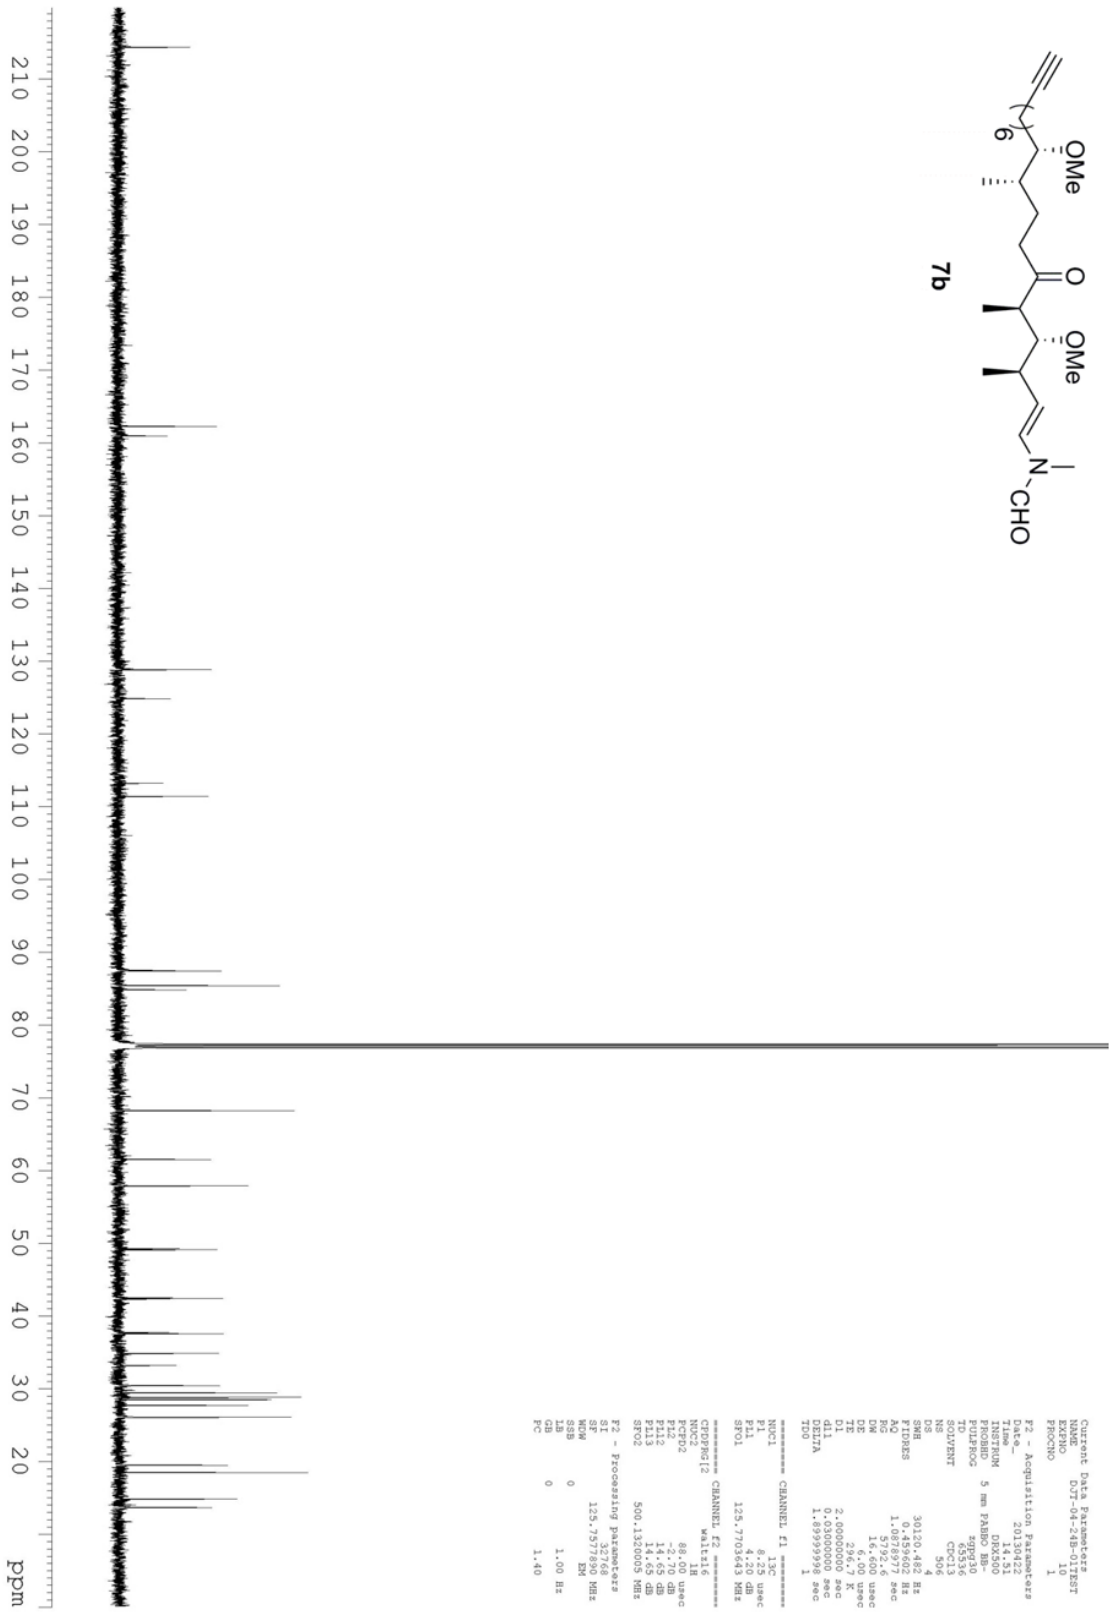

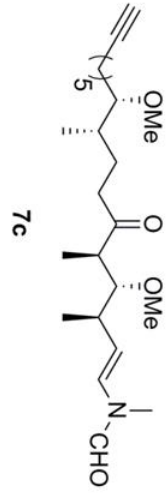

```

Current Data Parameters
NAME      DJT-07-197B-01
EXPNO    1
PROCNO   1
F2 - Acquisition Parameters
Date_      20131126
Time      10:30
PROBHD    5 mm PABBO 1H-
PULPROG   zgpg30
TD        65536
SOLVENT   CDCl3
DS        2
SH        1000.000 Hz
SI        32768
SF        500.1360000 MHz
AQ        3.2767999 sec
RG        327.680
DE        6.450 usec
TE        300.2 K
D1        1.0000000 sec
TD0       1
----- CHANNEL f1 -----
NUC1      13C
P1        800.1360000 MHz
PL1       0.0000000 M
PC1       26.0000000 M
F2 - Processing parameters
SI        32768
SF        500.1360000 MHz
WDW       EM
SSB       0
LB        0
GB        0
PC        1.00
  
```

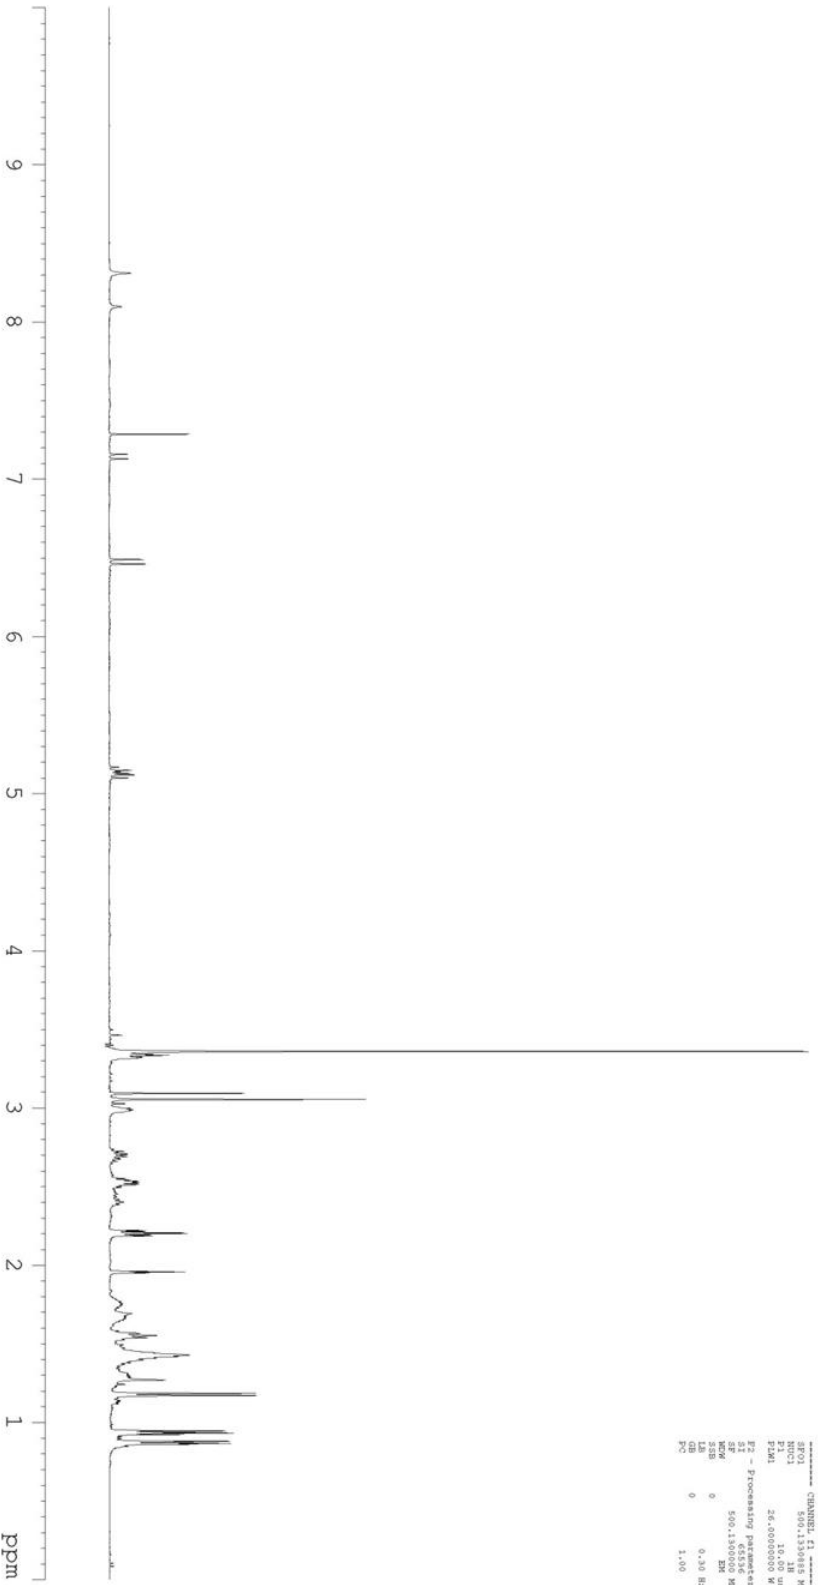



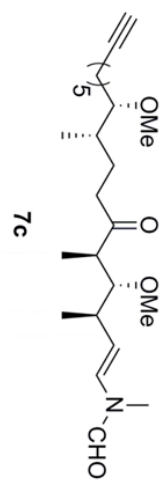

HSQC

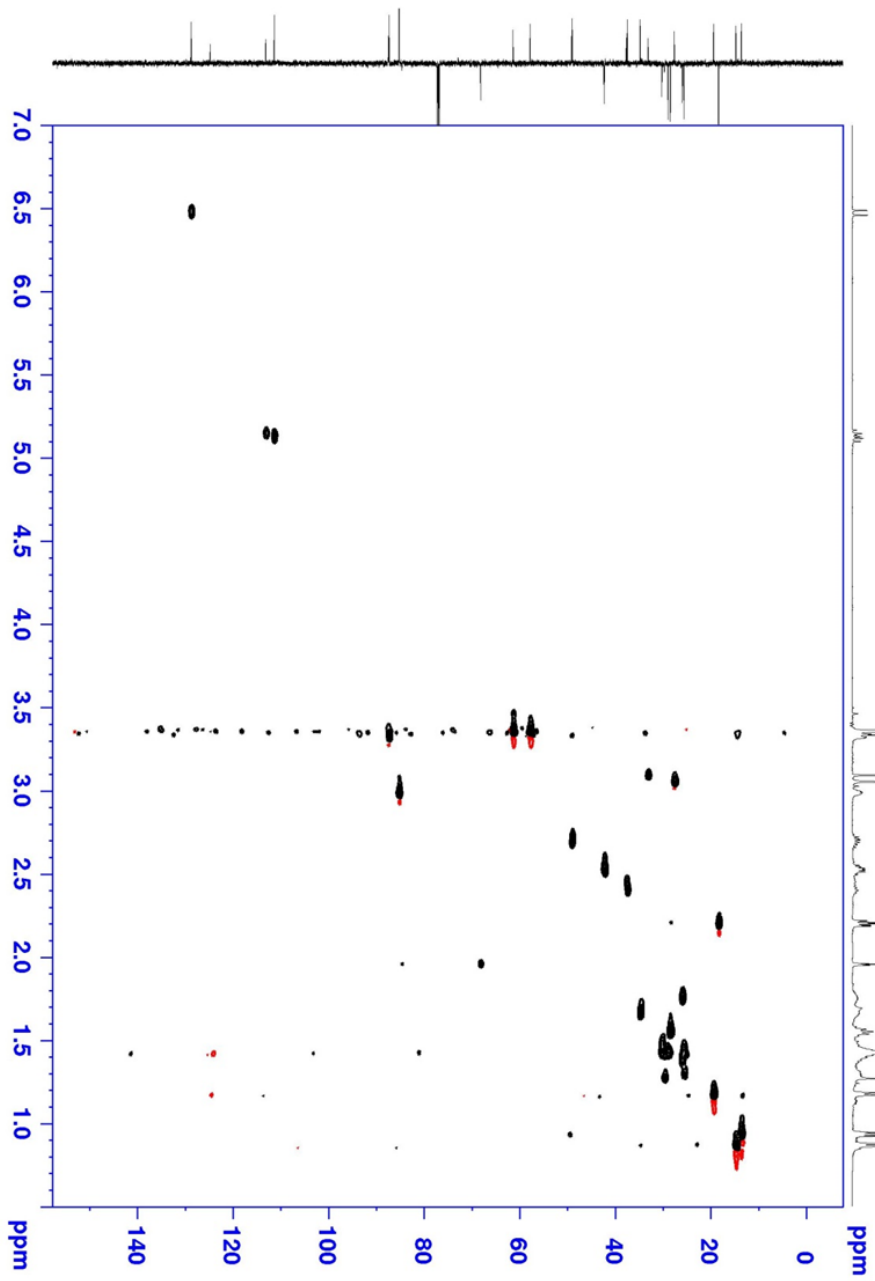



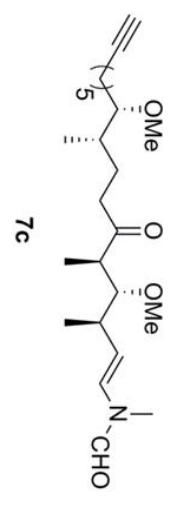

HSQC

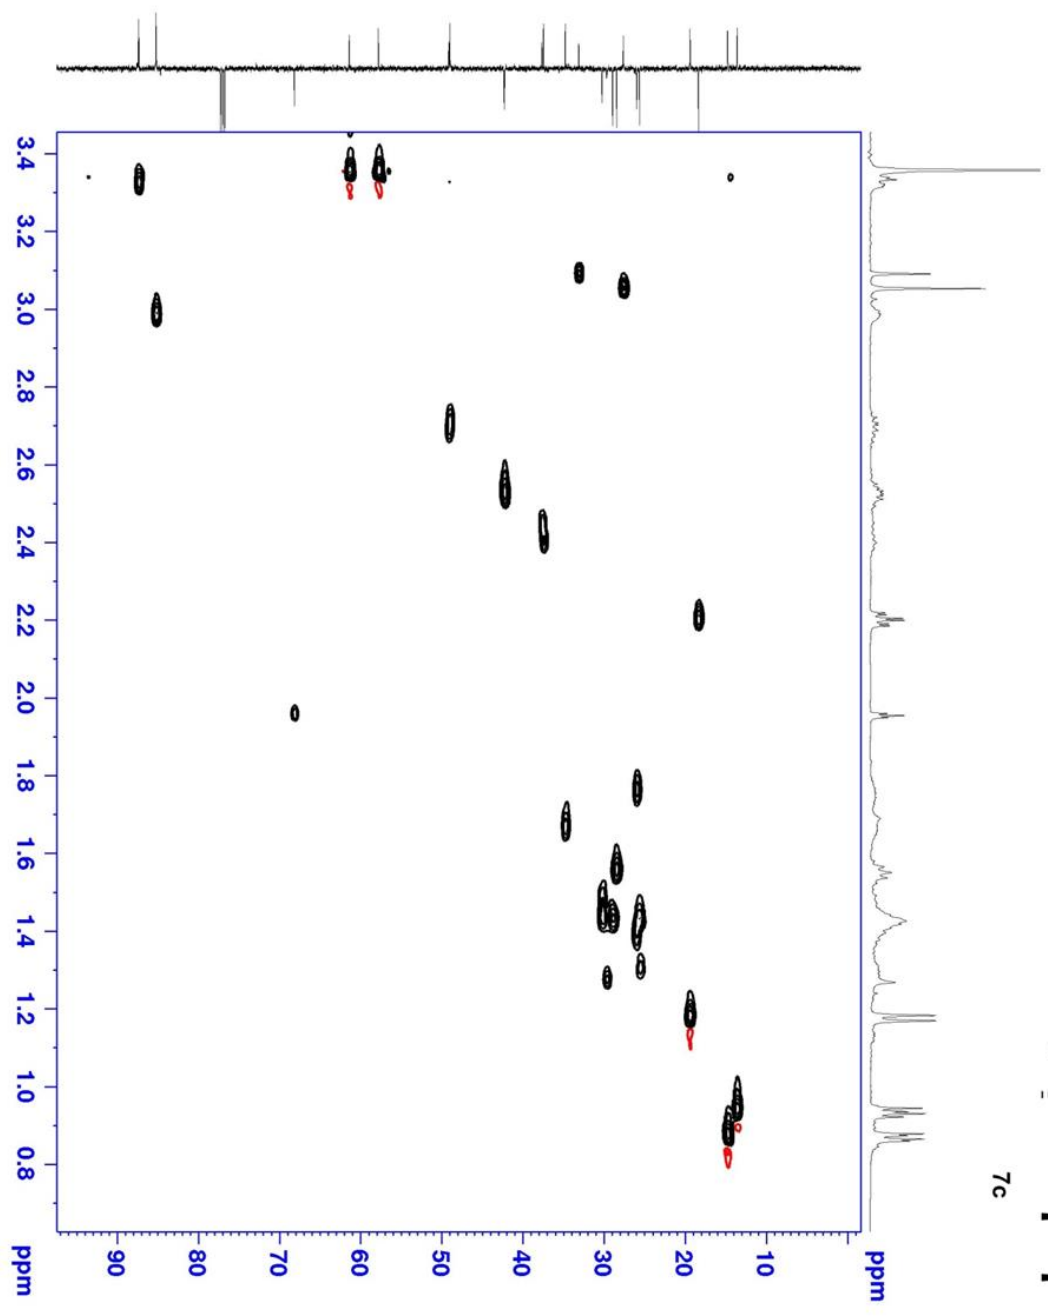

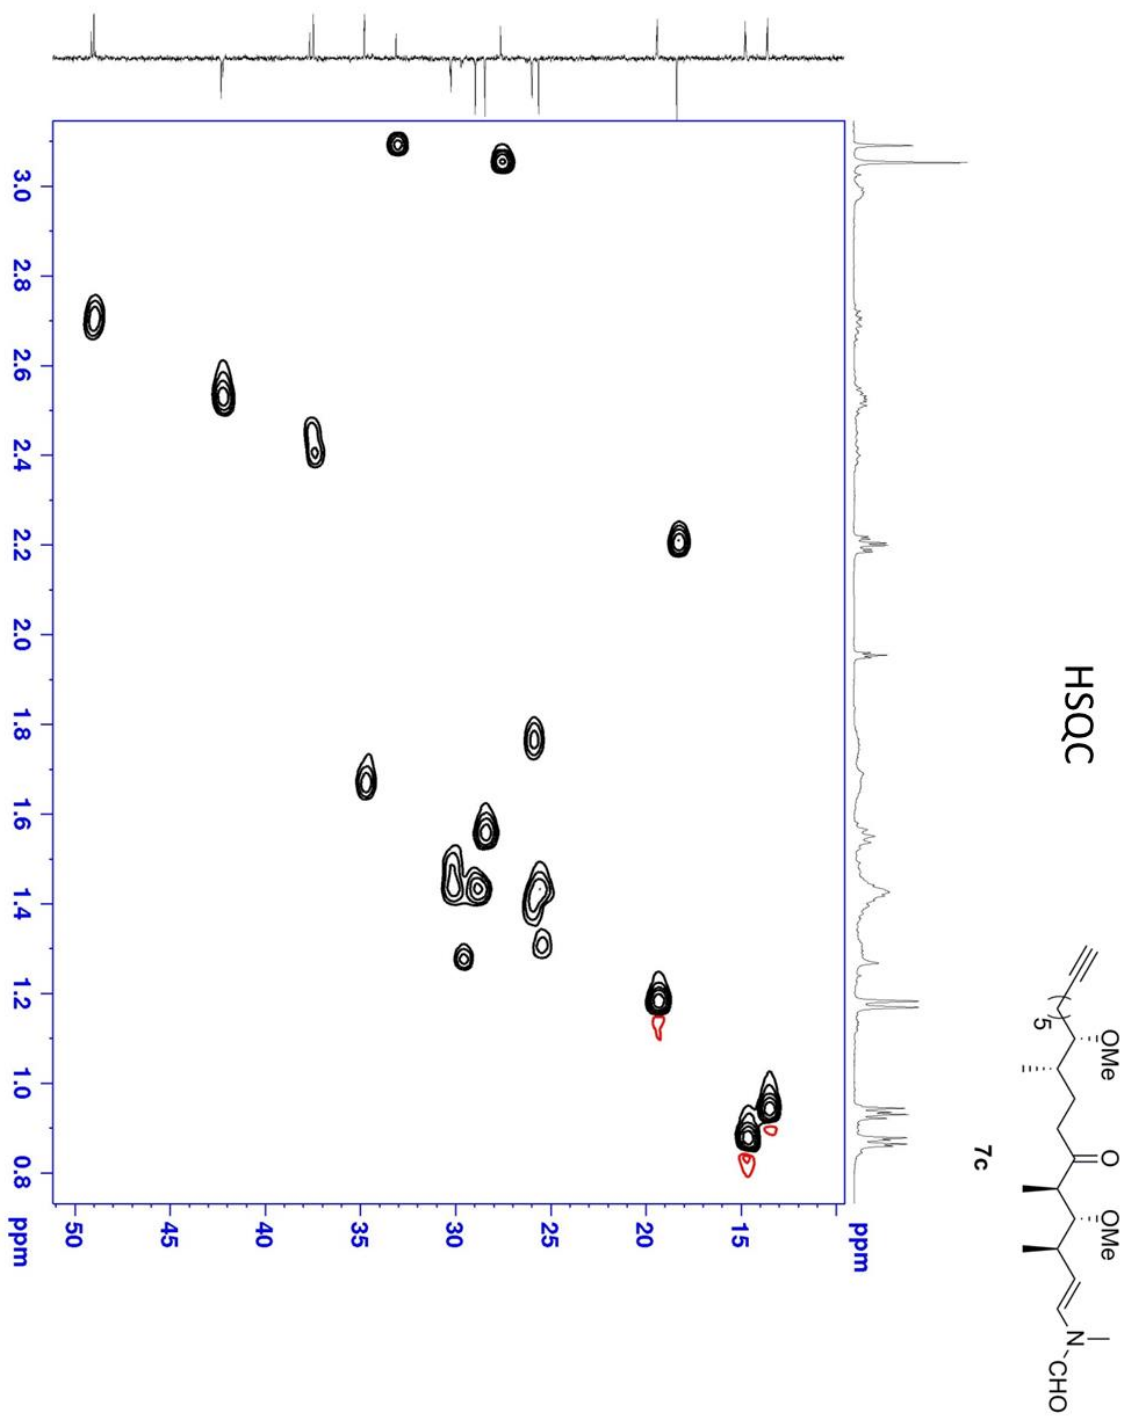

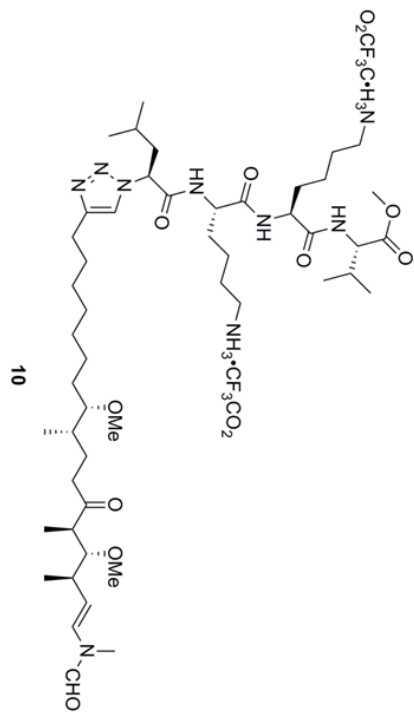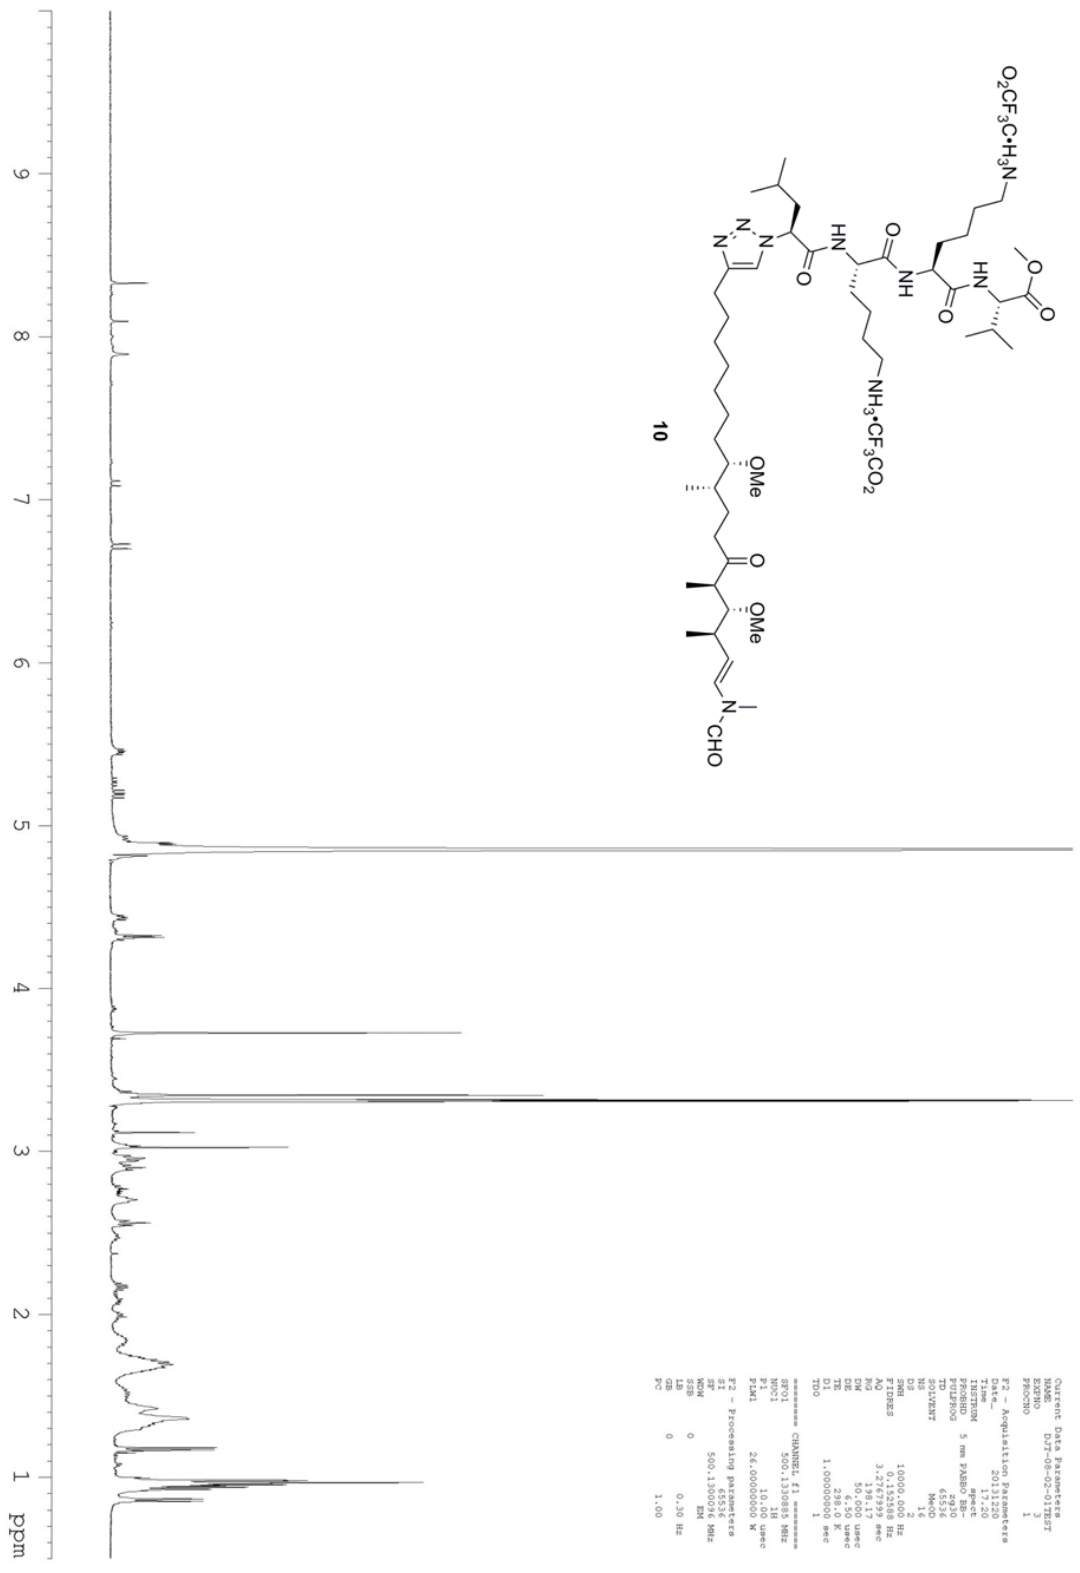

Current Data Parameters  
 NAME: D:\T-08-02-017E5T  
 EXPNO: 3  
 PROCNO: 1  
 F2 - Acquisition Parameters  
 Date\_Time: 2010/09/17 17:20  
 Time: 17.20  
 INSTRUM: spect  
 PROBHD: 5 mm PABBO  
 PULPROG: zgpg30  
 TO: 65536  
 SFO: 500.130461  
 NS: 16  
 DS: 16  
 SWH: 10000.000 Hz  
 FIDRES: 0.152588 Hz  
 AQ: 3.227979 sec  
 RG: 327.500  
 DM: 50.000 usec  
 DE: 2.000 usec  
 TE: 300.2 K  
 D1: 1.00000000 sec  
 TDO: 1  
 ===== CHANNEL f1 =====  
 NUCL1: 13C  
 P1: 10.00 usec  
 PL1: 24.00000000 W  
 FWD1:  
 F2 - Processing parameters  
 SI: 32768  
 SF: 500.130056 MHz  
 WDM: 0  
 LB: 0.30 Hz  
 GB: 0  
 PC: 1.00
